# Supplementary material for: Domino C–C/C–O bond formation: palladium-catalyzed regioselective synthesis of 7-iodobenzo[b]furans using 1,2,3-triiodobenzenes and benzylketones
Source: Royal Society of Chemistry journal article supplement (doi:10.1039/d1ra05730h), 2021-01-01
Supplement: d1ra05730h1.pdf [file d1ra05730h1.pdf]

*Jordan University of Science and Technology – Department of Chemistry  
University of Waterloo – Department of Chemistry*

***DOMINO C-C/C-O BOND FORMATION:  
PALLADIUM-CATALYZED REGIOSELECTIVE  
SYNTHESIS OF 7-iodobenzo[b]furans  
Using 1,2,3-triiodobenzenes and  
benzylketones***

*Supporting Information*

## Table of Contents

|                                                                                                                                                                       |    |
|-----------------------------------------------------------------------------------------------------------------------------------------------------------------------|----|
| Table of Contents .....                                                                                                                                               | i  |
| 1. Experimental Details and Compound Data .....                                                                                                                       | 1  |
| 1.1 General Information .....                                                                                                                                         | 1  |
| 1.2 General procedure for palladium-catalyzed regioselective domino $\alpha$ -arylation/intramolecular <i>O</i> -arylation of 5-substituted-1,2,3-triiodoarenes ..... | 1  |
| 1.2.1 Synthesis of 7-iodo-2,3-bis(4-methoxyphenyl)benzo[b]furan ( <b>7a</b> ).....                                                                                    | 2  |
| 1.2.2 Synthesis of 7-iodo-2,3-diphenylbenzo[b]furan ( <b>7b</b> ).....                                                                                                | 2  |
| 1.2.3 Synthesis of 2-(4-chlorophenyl)-7-iodo-3-phenylbenzo[b]furan ( <b>7c</b> ).....                                                                                 | 3  |
| 1.2.4 Synthesis of 7-iodo-3-(4-methoxyphenyl)-2-methylbenzo[b]furan ( <b>7d</b> ).....                                                                                | 3  |
| 1.2.5 Synthesis of 7-iodo-2,3-bis(4-methoxyphenyl)-5-methylbenzo[b]furan ( <b>7e</b> ).....                                                                           | 3  |
| 1.2.6 Synthesis of 7-iodo-5-methyl-2,3-diphenylbenzo[b]furan ( <b>7f</b> ).....                                                                                       | 4  |
| 1.2.7 Synthesis of 2-(4-chlorophenyl)-7-iodo-5-methyl-3-phenylbenzo[b]furan ( <b>7g</b> ).....                                                                        | 4  |
| 1.2.8 Synthesis of 7-iodo-5-methoxy-2,3-bis(4-methoxyphenyl)benzo[b]furan ( <b>7h</b> ).....                                                                          | 5  |
| 1.2.9 Synthesis of 7-iodo-5-methoxy-2,3-diphenylbenzo[b]furan ( <b>7i</b> ).....                                                                                      | 5  |
| 1.2.10 Synthesis of 7-iodo-5-methoxy-3-(4-methoxyphenyl)-2-methylbenzo[b]furan ( <b>7j</b> ).....                                                                     | 6  |
| 1.2.11 Synthesis of 5-fluoro-7-iodo-2,3-bis(4-methoxyphenyl)benzo[b]furan ( <b>7k</b> ).....                                                                          | 6  |
| 1.2.12 Synthesis of 5-chloro-7-iodo-2,3-bis(4-methoxyphenyl)benzo[b]furan ( <b>7l</b> ).....                                                                          | 7  |
| 1.2.13 Synthesis of 5-chloro-7-iodo-2,3-diphenylbenzo[b]furan ( <b>7m</b> ).....                                                                                      | 7  |
| 1.2.14 Synthesis of 2-benzyl-5-chloro-7-iodo-3-phenylbenzo[b]furan ( <b>7n</b> ).....                                                                                 | 7  |
| 1.2.15 Synthesis of 5-bromo-7-iodo-2,3-bis(4-methoxyphenyl)benzo[b]furan ( <b>7p</b> ).....                                                                           | 8  |
| 1.2.16 Synthesis of methyl 7-iodo-2,3-bis(4-methoxyphenyl)benzo[b]furan-5-carboxylate ( <b>7q</b> ).....                                                              | 8  |
| 1.2.17 Synthesis of 7-chloro-2,3-bis(4-methoxyphenyl)benzo[b]furan ( <b>7r</b> ).....                                                                                 | 10 |
| 1.2.18 Synthesis of 7-chloro-2,3-diphenylbenzo[b]furan ( <b>7s</b> ).....                                                                                             | 10 |
| 1.2.19 Synthesis of 7-bromo-2,3-bis(4-methoxyphenyl)benzo[b]furan ( <b>7t</b> ).....                                                                                  | 9  |
| 1.2.20 Synthesis of 7-bromo-2,3-diphenylbenzo[b]furan ( <b>7u</b> ).....                                                                                              | 9  |
| 1.2.21 Synthesis of 1-(5-chloro-2,3-diiodophenyl)-1-(4-methoxyphenyl)propan-2-one .....                                                                               | 10 |
| 1.3 NMR Spectra for New Compounds .....                                                                                                                               | 12 |
| 1.3.1 <sup>1</sup> H-NMR of 7-iodo-2,3-bis(4-methoxyphenyl)benzo[b]furan ( <b>7a</b> ) in d-CDCl <sub>3</sub> at 25 °C.....                                           | 12 |
| 1.3.2 <sup>13</sup> C-NMR of 7-iodo-2,3-bis(4-methoxyphenyl)benzo[b]furan ( <b>7a</b> ) in d-CDCl <sub>3</sub> at 25 °C.....                                          | 13 |
| 1.3.3 <sup>1</sup> H-NMR of 7-iodo-2,3-diphenylbenzo[b]furan ( <b>7b</b> ) in d-CDCl <sub>3</sub> at 25 °C.....                                                       | 14 |
| 1.3.4 <sup>13</sup> C-NMR of 7-iodo-2,3-diphenylbenzo[b]furan ( <b>7b</b> ) in d-CDCl <sub>3</sub> at 25 °C.....                                                      | 15 |
| 1.3.5 <sup>1</sup> H-NMR of 2-(4-chlorophenyl)-7-iodo-3-phenylbenzo[b]furan ( <b>7c</b> ) in d-CDCl <sub>3</sub> at 25 °C.....                                        | 16 |
| 1.3.6 <sup>13</sup> C-NMR of 2-(4-chlorophenyl)-7-iodo-3-phenylbenzo[b]furan ( <b>7c</b> ) in d-CDCl <sub>3</sub> at 25 °C.....                                       | 17 |
| 1.3.7 <sup>1</sup> H-NMR of 7-iodo-3-(4-methoxyphenyl)-2-methylbenzofuran ( <b>7d</b> ) in d-CDCl <sub>3</sub> at 25 °C.....                                          | 18 |
| 1.3.8 <sup>13</sup> C-NMR of 7-iodo-3-(4-methoxyphenyl)-2-methylbenzo[b]furan ( <b>7d</b> ) in d-CDCl <sub>3</sub> at 25 °C.....                                      | 19 |
| 1.3.9 <sup>1</sup> H-NMR of 7-iodo-2,3-bis(4-methoxyphenyl)-5-methylbenzo[b]furan ( <b>7e</b> ) in d-CDCl <sub>3</sub> at 25 °C.....                                  | 20 |
| 1.3.10 <sup>13</sup> C-NMR of 7-iodo-2,3-bis(4-methoxyphenyl)-5-methylbenzo[b]furan ( <b>7e</b> ) in d-CDCl <sub>3</sub> at 25 °C.....                                | 21 |
| 1.3.11 <sup>1</sup> H-NMR of 7-iodo-5-methyl-2,3-diphenylbenzo[b]furan ( <b>7f</b> ) in d-CDCl <sub>3</sub> at 25 °C.....                                             | 22 |
| 1.3.12 <sup>13</sup> C-NMR of 7-iodo-5-methyl-2,3-diphenylbenzo[b]furan ( <b>7f</b> ) in d-CDCl <sub>3</sub> at 25 °C.....                                            | 23 |
| 1.3.13 <sup>1</sup> H-NMR of 2-(4-chlorophenyl)-7-iodo-5-methyl-3-phenylbenzo[b]furan ( <b>7g</b> ) in d-CDCl <sub>3</sub> at 25 °C.....                              | 24 |
| 1.3.14 <sup>13</sup> C-NMR of 2-(4-chlorophenyl)-7-iodo-5-methyl-3-phenylbenzo[b]furan ( <b>7g</b> ) in d-CDCl <sub>3</sub> at 25 °C.....                             | 25 |
| 1.3.15 <sup>1</sup> H-NMR of 7-iodo-5-methoxy-2,3-bis(4-methoxyphenyl)benzo[b]furan ( <b>7h</b> ) in d-CDCl <sub>3</sub> at 25 °C.....                                | 26 |
| 1.3.16 <sup>13</sup> C-NMR of 7-iodo-5-methoxy-2,3-bis(4-methoxyphenyl)benzo[b]furan ( <b>7h</b> ) in d-CDCl <sub>3</sub> at 25 °C.....                               | 27 |
| 1.3.17 <sup>1</sup> H-NMR of 7-iodo-5-methoxy-2,3-diphenylbenzo[b]furan ( <b>7i</b> ) in d-CDCl <sub>3</sub> at 25 °C.....                                            | 28 |
| 1.3.18 <sup>13</sup> C-NMR of 7-iodo-5-methoxy-2,3-diphenylbenzo[b]furan ( <b>7i</b> ) in d-CDCl <sub>3</sub> at 25 °C.....                                           | 29 |
| 1.3.19 <sup>1</sup> H-NMR of 7-iodo-5-methoxy-3-(4-methoxyphenyl)-2-methylbenzo[b]furan ( <b>7j</b> ) in d-CDCl <sub>3</sub> at 25 °C.....                            | 30 |

|            |                                                                                                                                           |           |
|------------|-------------------------------------------------------------------------------------------------------------------------------------------|-----------|
| 1.3.20     | <sup>13</sup> C-NMR of 7-iodo-5-methoxy-3-(4-methoxyphenyl)-2-methylbenzo[b]furan ( <b>7j</b> ) in d-CDCl <sub>3</sub> at 25 °C.....      | 31        |
| 1.3.21     | <sup>1</sup> H-NMR of 5-fluoro-7-iodo-2,3-bis(4-methoxyphenyl)benzo[b]furan nzo-furan ( <b>7k</b> ) in d-CDCl <sub>3</sub> at 25 °C.....  | 32        |
| 1.3.22     | <sup>13</sup> C-NMR of 5-fluoro-7-iodo-2,3-bis(4-methoxyphenyl)benzo[b]furan ( <b>7k</b> ) in d-CDCl <sub>3</sub> at 25 °C.....           | 33        |
| 1.3.23     | <sup>1</sup> H-NMR of 5-chloro-7-iodo-2,3-bis(4-methoxyphenyl)benzo[b]furan ( <b>7l</b> ) in d-CDCl <sub>3</sub> at 25 °C.....            | 34        |
| 1.3.24     | <sup>13</sup> C-NMR of 5-chloro-7-iodo-2,3-bis(4-methoxyphenyl)benzo[b]furan ( <b>7l</b> ) in d-CDCl <sub>3</sub> at 25 °C.....           | 35        |
| 1.3.25     | <sup>1</sup> H-NMR of 5-chloro-7-iodo-2,3-diphenylbenzo[b]furan ( <b>7m</b> ) in d-CDCl <sub>3</sub> at 25 °C.....                        | 36        |
| 1.3.26     | <sup>13</sup> C-NMR of 5-chloro-7-iodo-2,3-diphenylbenzo[b]furan ( <b>7m</b> ) in d-CDCl <sub>3</sub> at 25 °C.....                       | 37        |
| 1.3.27     | <sup>1</sup> H-NMR of 2-benzyl-5-chloro-7-iodo-3-phenylbenzo[b]furan ( <b>7n</b> ) in d-CDCl <sub>3</sub> at 25 °C.....                   | 38        |
| 1.3.28     | <sup>13</sup> C-NMR of 2-benzyl-5-chloro-7-iodo-3-phenylbenzo[b]furan ( <b>7n</b> ) in d-CDCl <sub>3</sub> at 25 °C.....                  | 39        |
| 1.3.1      | <sup>1</sup> H-NMR of 5-bromo-7-iodo-2,3-bis(4-methoxyphenyl)benzo[b]furan ( <b>7p</b> ) in d-CDCl <sub>3</sub> at 25 °C.....             | 40        |
| 1.3.2      | <sup>13</sup> C-NMR of 5-bromo-7-iodo-2,3-bis(4-methoxyphenyl)benzo[b]furan ( <b>7p</b> ) in d-CDCl <sub>3</sub> at 25 °C.....            | 41        |
| 1.3.3      | <sup>1</sup> H-NMR of methyl 7-iodo-2,3-bis(4-methoxyphenyl)benzo[b]furan-5-carboxylate ( <b>7q</b> ) in d-CDCl <sub>3</sub> at 25 °C.... | 42        |
| 1.3.4      | <sup>13</sup> C-NMR of methyl 7-iodo-2,3-bis(4-methoxyphenyl)benzo[b]furan-5-carboxylate ( <b>7q</b> ) in d-CDCl <sub>3</sub> at 25 °C... | 43        |
| 1.3.1      | <sup>1</sup> H-NMR of 7-chloro-2,3-bis(4-methoxyphenyl)benzo[b]furan ( <b>7r</b> ) in d-CDCl <sub>3</sub> at 25 °C.....                   | 46        |
| 1.3.2      | <sup>13</sup> C-NMR of 7-chloro-2,3-bis(4-methoxyphenyl)benzo[b]furan ( <b>7r</b> ) in d-CDCl <sub>3</sub> at 25 °C.....                  | 47        |
| 1.3.3      | <sup>1</sup> H-NMR of 7-bromo-2,3-bis(4-methoxyphenyl)benzo[b]furan ( <b>7t</b> ) in d-CDCl <sub>3</sub> at 25 °C.....                    | 44        |
| 1.3.4      | <sup>13</sup> C-NMR of 7-bromo-2,3-bis(4-methoxyphenyl)benzo[b]furan ( <b>7t</b> ) in d-CDCl <sub>3</sub> at 25 °C.....                   | 45        |
| 1.3.5      | <sup>1</sup> H-NMR of 1-(5-chloro-2,3-diiodophenyl)-1-(4-methoxyphenyl)propan-2-one in d-CDCl <sub>3</sub> at 25 °C.....                  | 48        |
| 1.3.6      | <sup>13</sup> C-NMR of 1-(5-chloro-2,3-diiodophenyl)-1-(4-methoxyphenyl)propan-2-one in d-CDCl <sub>3</sub> at 25 °C.....                 | 49        |
| <b>1.4</b> | <b>X-ray of new compounds.....</b>                                                                                                        | <b>50</b> |
| 1.4.1      | X-ray data of 2-(4-chlorophenyl)-7-iodo-3-phenyl-1-benzo[b]furan ( <b>7c</b> ) .....                                                      | 50        |
| 1.4.2      | X-ray data of 2-(4-chlorophenyl)-7-iodo-5-methyl-3-phenyl-1-benzo[b]furan ( <b>7g</b> ) .....                                             | 62        |

## **1. Experimental Details and Compound Data**

### **1.1 General Information**

All commercial reagents and chromatography solvents were used as obtained unless otherwise stated. Ethanol, toluene, ethyl acetate, hexanes, anhydrous sodium sulfate (Na<sub>2</sub>SO<sub>4</sub>, BDH). Anhydrous solvents were distilled over appropriate drying agents prior to use. Analytical thin layer chromatography (TLC) was performed on Merck silica gel 60 F<sub>254</sub>. Merck Silica gel 60 (0.063 - 0.2 mm) was used for column chromatography. Visualization of TLC was accomplished with UV light (254 nm). NMR spectra were recorded on a Bruker-Avance 400 MHz spectrometer. The residual solvent protons (<sup>1</sup>H) or the solvent carbon (<sup>13</sup>C) were used as internal standards. <sup>1</sup>H-NMR data are presented as follows: chemical shift in ppm (δ) downfield from trimethylsilane (multiplicity, integration, coupling constant). The following abbreviations are used in reporting NMR data: s, singlet; bs, broad singlet; d, doublet; t, triplet; q, quartet; dq, doublet of quartets; dd, doublet of doublets; m, multiplet. High resolution mass spectra were recorded using Chemical Ionization (CI) and Electrospray ionization (ESI) techniques.

### **1.2 General procedure for palladium-catalyzed regioselective domino $\alpha$ -arylation/intramolecular O-arylation of 5-substituted-1,2,3-triiodoarenes and benzylketones**

A flame-dry round bottom flask with condenser was charged with 5-substituted-1,2,3-triiodobenzene (0.65 mmol, 1.0 equiv.), benzylketone (0.78 mmol, 1.2 equiv.), tetrakis-(triphenylphosphine)palladium(0) (20 mol%), cesium carbonate (3.0 equiv.) and 6.5 mL toluene (0.1M). The reaction mixture was sealed with septa, purged with argon

and then heated to 130 °C for 12 h. The reaction was cooled down to room temperature, 15 mL of distilled water was added and extracted with ethyl acetate (2 x 50 mL). The organic layers were combined and washed with brine, dried with Na<sub>2</sub>SO<sub>4</sub>, filtered and then concentrated under reduced pressure. The crude product was purified by flash chromatography (15% EthOAc/Hexanes) to yield the pure desired product.

### 1.2.1 Synthesis of 7-iodo-2,3-bis(4-methoxyphenyl)benzo[b]furan (7a)

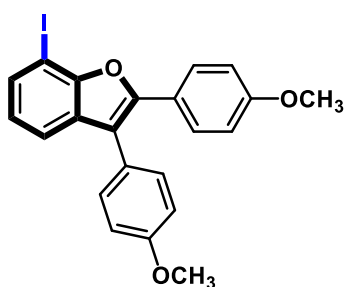

The title compound was prepared using the general procedure and isolated as white solid (75% yields). **IR** (cast film, cm<sup>-1</sup>) 3017, 2922, 1589, 1575, 1208, 1128, 1027, 697.  $\delta_{\text{H}}$  (400 MHz, *d*-CDCl<sub>3</sub>)  $\delta$ : 7.62-7.66 (m, 3H), 7.38-7.42 (m, 3H), 6.95-7.1 (m, 3H), 6.85-6.88 (d, 2H, *J* = 8.84 Hz), 3.89 (s, 3H), 3.83 (s, 3H).  $\delta_{\text{C}}$  (100 MHz, *d*-CDCl<sub>3</sub>)  $\delta$ : 160.0, 159.0, 154.2, 151.1, 133.1, 131.0, 130.9, 128.7, 124.9, 124.6, 123.1, 119.9, 116.6, 114.7, 114.1, 74.9, 55.5, 55.4. **M.p**: 117-118°C. **HRMS** (EI) *m/z* for C<sub>22</sub>H<sub>17</sub>IO<sub>3</sub> [M]<sup>+</sup>: calcd. Exact 456.0222; found, 456.0217

### 1.2.2 Synthesis of 7-iodo-2,3-diphenylbenzo[b]furan (7b)

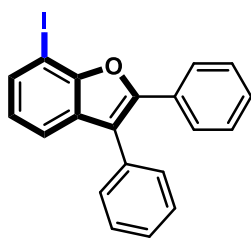

The title compound was prepared using the general procedure and isolated as white solid (73% yields). **IR** (cast film, cm<sup>-1</sup>) 2998, 2975, 1602, 1589, 982, 702.  $\delta_{\text{H}}$  (400 MHz, *d*-CDCl<sub>3</sub>)  $\delta$ : 7.68-7.70 (m, 3H), 7.43-7.50 (m, 6H), 7.30-7.35 (m, 3H), 7.00 (dd, 1H, *J* = 7.8 Hz, *J* = 7.7 Hz).  $\delta_{\text{C}}$  (100 MHz, *d*-CDCl<sub>3</sub>)  $\delta$ : 154.4, 151.1, 133.7, 132.7, 130.5, 130.3, 129.9, 128.9, 128.7, 128.1, 127.3, 124.8, 120.3, 118.5, 75.0. **M.p**: 107-109°C. **HRMS** (EI) *m/z* for C<sub>20</sub>H<sub>13</sub>IO [M]<sup>+</sup>: calcd. Exact 396.0011; found, 396.0008.

### 1.2.3 Synthesis of 2-(4-chlorophenyl)-7-iodo-3-phenylbenzo[b]furan (7c)

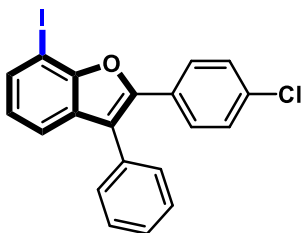

The title compound was prepared using the general procedure for and isolated as white solid (**67%** yields). **IR** (cast film,  $\text{cm}^{-1}$ ) 3011, 2989, 1584, 1562, 1018, 875, 771.  $\delta_{\text{H}}$  (400 MHz,  $d\text{-CDCl}_3$ )  $\delta$ : 7.69 (d, 1H,  $J = 7.64$  Hz), 7.61 (d, 2H,  $J = 8.56$  Hz), 7.42-7.50 (m, 6H), 7.30 (2H), 7.00 (dd, 1H,  $J_1 = 7.68$ ,  $J_2 = 7.76$  Hz).  $\delta_{\text{C}}$  (100 MHz,  $d\text{-CDCl}_3$ )  $\delta$ : 154.4, 149.9, 134.8, 133.9, 132.4, 130.4, 129.8, 129.4, 128.9, 128.8, 128.4, 128.3, 124.9, 120.3, 118.9, 75.0. **M.p.**: 105-107°C. **HRMS** (EI)  $m/z$  for  $\text{C}_{20}\text{H}_{12}\text{ClIO}$   $[\text{M}]^+$ : calcd. Exact 429.9621; found, 429.9617.

### 1.2.4 Synthesis of 7-iodo-3-(4-methoxyphenyl)-2-methylbenzo[b]furan (7d)

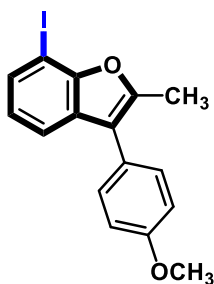

The title compound was prepared using the general procedure and isolated as pale-yellow oil (**53%** yields). **IR** (cast film,  $\text{cm}^{-1}$ ) 3025, 2998, 1602, 1586, 1208, 1127, 938, 706.  $\delta_{\text{H}}$  (400 MHz,  $d\text{-CDCl}_3$ )  $\delta$ : 7.60 (d, 1H,  $J = 7.64$  Hz), 7.48 (d, 1H,  $J = 7.76$  Hz), 7.39 (d, 1H,  $J = 8.48$  Hz), 6.95-7.10 (m, 3H), 3.87 (s, 3H), 2.56 (s, 3H).  $\delta_{\text{C}}$  (100 MHz,  $d\text{-CDCl}_3$ )  $\delta$ : 159.0, 151.8, 132.5, 130.2, 129.4, 124.8, 124.4, 119.6, 117.7, 114.6, 114.5, 74.8, 55.5, 13.1. **HRMS** (EI)  $m/z$  for  $\text{C}_{16}\text{H}_{13}\text{IO}_2$   $[\text{M}]^+$ : calcd. 363.9960; found, 363.9956.

### 1.2.5 Synthesis of 7-iodo-2,3-bis(4-methoxyphenyl)-5-methylbenzo[b]furan (7e)

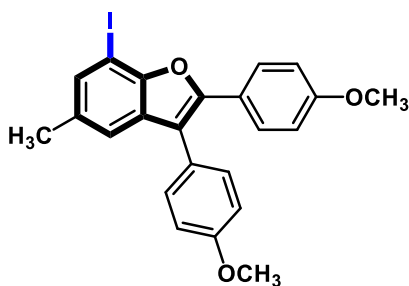

The title compound was prepared using the general procedure and isolated as pale-yellow oil (**72%** yields). **IR** (cast film,  $\text{cm}^{-1}$ ) 3051, 3007, 1208, 1157, 972, 751.  $\delta_{\text{H}}$  (400 MHz,  $d\text{-CDCl}_3$ )  $\delta$ : 7.61 (d, 2H,  $J = 8.96$  Hz), 7.47 (s,

1H), 7.38 (d, 2H,  $J = 8.68$  Hz), 7.16 (s, 1H), 7.00 (d, 2H,  $J = 8.72$  Hz), 6.85 (d, 2H,  $J = 8.92$  Hz), 3.88 (s, 3H), 3.82 (s, 3H), 2.37 (s, 3H).  $\delta_c$  (100 MHz,  $d$ -CDCl<sub>3</sub>)  $\delta$ : 159.9, 159.3, 152.7, 151.2, 134.4, 134.1, 131.0, 130.8, 128.6, 125.2, 123.2, 119.9, 116.3, 114.7, 114.1, 74.36, 55.5, 55.4, 21.1. **HRMS** (EI)  $m/z$  for C<sub>23</sub>H<sub>19</sub>IO<sub>3</sub> [M]<sup>+</sup>: calcd. 470.0379; found, 470.0375.

### 1.2.6 Synthesis of 7-iodo-5-methyl-2,3-diphenylbenzo[b]furan (7f)

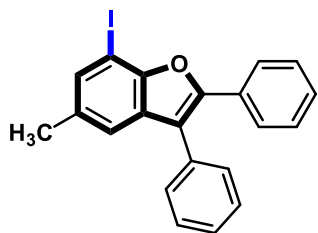

The title compound was prepared using the general procedure and isolated as pale-yellow oil (**71%** yields). **IR** (cast film, cm<sup>-1</sup>) 3022, 2937, 1602, 1586, 976, 772.  $\delta_H$  (400 MHz,  $d$ -CDCl<sub>3</sub>)  $\delta$ : 7.67 (dd, 2H,  $J_1 = 2.16$ Hz,  $J_2 = 8.0$ Hz), 7.52 (s, 1H), 7.42-7.50 (m, 5H), 7.30-7.33 (m, 3H), 7.20 (s, 1H), 2.39 (s, 3H).  $\delta_c$  (100 MHz,  $d$ -CDCl<sub>3</sub>)  $\delta$ : 152.9, 151.2, 134.7, 132.9, 130.4, 130.4, 129.9, 129.2, 128.8, 128.6, 127.9, 127.2, 125.7, 120.2, 118.2, 74.5, 21.1. **HRMS** (EI)  $m/z$  for C<sub>21</sub>H<sub>15</sub>IO [M]<sup>+</sup>: calcd. 410.0168; found, 410.0166.

### 1.2.7 Synthesis of 2-(4-chlorophenyl)-7-iodo-5-methyl-3-phenylbenzo[b]furan (7g)

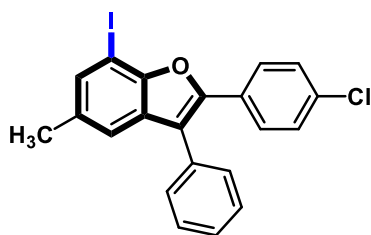

The title compound was prepared using the general procedure and isolated as pale-yellow solid (**63%** yields). **IR** (cast film, cm<sup>-1</sup>) 3004, 2984, 1601, 1598, 932, 695.  $\delta_H$  (400 MHz,  $d$ -CDCl<sub>3</sub>)  $\delta$ : 7.59 (d, 2H,  $J = 8.52$  Hz), 7.53 (s, 3H), 7.40-7.50 (m, 5H), 7.28 (d, 2H,  $J = 8.56$ Hz), 7.19 (s, 1H).  $\delta_c$  (100 MHz,  $d$ -CDCl<sub>3</sub>)  $\delta$ : 152.9, 150.1, 134.9, 134.8, 134.6, 132.5, 130.3, 129.8, 129.3, 128.9, 128.4, 128.2, 120.2, 118.7, 74.5, 21.1. **M.p**: 188-189°C. **HRMS** (EI)  $m/z$  for C<sub>21</sub>H<sub>14</sub>ClIO [M]<sup>+</sup>: calcd. 443.9778; found, 443.9769.

### 1.2.8 Synthesis of 7-iodo-5-methoxy-2,3-bis(4-methoxyphenyl)benzo[b]furan (7h)

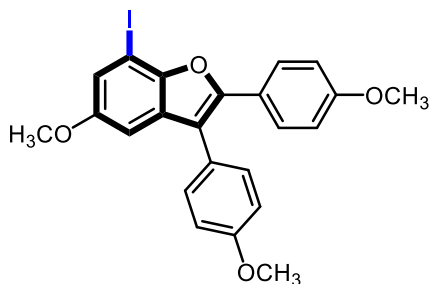

The title compound was prepared using the general procedure and isolated as colorless oil (**77%** yields).

**IR** (cast film,  $\text{cm}^{-1}$ ) 3012, 2997, 1614, 1601, 1253, 1165, 948, 758.  $\delta_{\text{H}}$  (400 MHz,  $d\text{-CDCl}_3$ )  $\delta$ : 7.55-7.62 (m, 2H), 7.35-7.43 (m, 3H), 7.00 (d, 2H,  $J = 8.56$  Hz),

6.83-6.88 (m, 3H), 3.89 (s, 3H), 3.82 (s, 3H), 3.79 (s, 3H).  $\delta_{\text{C}}$  (100 MHz,  $d\text{-CDCl}_3$ )  $\delta$ : 159.9, 159.3, 156.8, 152.1, 149.5, 130.9, 128.6, 125.1, 123.2, 121.3, 114.7, 114.6, 114.1, 114.0, 103.0, 74.5, 56.3, 55.5, 55.4. **HRMS** (EI)  $m/z$  for  $\text{C}_{23}\text{H}_{19}\text{IO}_4$   $[\text{M}]^+$ : calcd. Exact 486.0328; found, 486.0324.

### 1.2.9 Synthesis of 7-iodo-5-methoxy-2,3-diphenylbenzo[b]furan (7i)

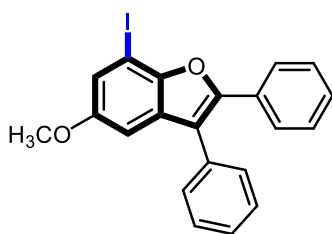

The title compound was prepared using the general procedure and isolated as colorless oil (**67%** yields). **IR**

(cast film,  $\text{cm}^{-1}$ ) 3021, 2992, 1592, 1128, 984, 783.  $\delta_{\text{H}}$  (400MHz,  $d\text{-CDCl}_3$ )  $\delta$ : 7.64-7.70 (m, 2H), 7.46-7.50 (m, 5H),

7.31-7.33 (m, 4H), 6.88 (d, 1H,  $J = 2.32$  Hz), 3.79 (s, 3H).  $\delta_{\text{C}}$  (100 MHz,  $d\text{-CDCl}_3$ )  $\delta$ : 156.9, 152.1, 149.8, 132.8, 130.4, 130.3, 129.8, 129.3, 128.8, 128.6, 128.0, 127.2, 122.0, 118.7, 103.2, 74.7, 56.4. **HRMS** (EI)  $m/z$  for  $\text{C}_{21}\text{H}_{15}\text{IO}_2$   $[\text{M}]^+$ : calcd. 426.0117; found, 426.0113.



### 1.2.10 Synthesis of 7-iodo-5-methoxy-3-(4-methoxyphenyl)-2-methyl benzo[b]furan (7j)

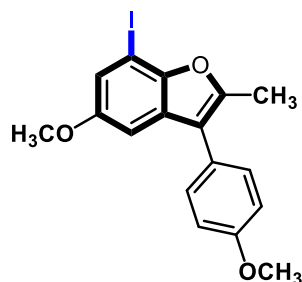

The title compound was prepared using the general procedure and isolated as colorless oil (**20%** yields). **IR** (cast film,  $\text{cm}^{-1}$ ) 3008, 2984, 1608, 1554, 1242, 1125, 968, 884, 745.  $\delta_{\text{H}}$  (400 MHz,  $d\text{-CDCl}_3$ )  $\delta$ : 7.37 (d, 2H,  $J = 8.56$  Hz), 7.21 (d, 1H,  $J = 2.20$  Hz), 7.02 (d, 2H,  $J = 8.56$  Hz), 6.95 (d, 1H,  $J = 2.16$  Hz), 3.87 (s, 3H), 3.79 (s, 3H), 2.52 (s, 3H).  $\delta_{\text{C}}$  (100 MHz,  $d\text{-CDCl}_3$ )  $\delta$ : 159.0, 156.7, 152.8, 149.8, 130.2, 129.3, 124.9, 120.4, 117.9, 114.5, 103.2, 74.3, 56.4, 55.5, 13.1. **HRMS** (EI)  $m/z$  for  $\text{C}_{17}\text{H}_{15}\text{IO}_3$   $[\text{M}]^+$ : calcd. Exact 394.0066; found, 394.0060.

### 1.2.11 Synthesis of 5-fluoro-7-iodo-2,3-bis(4-methoxyphenyl)benzo[b]furan (7k)

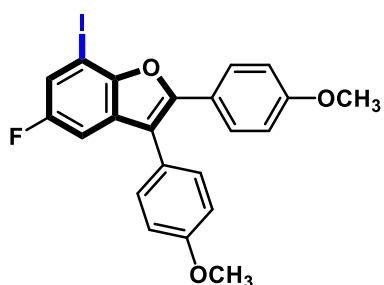

The title compound was prepared using the general procedure and isolated as colorless oil (**79%** yields). **IR** (cast film,  $\text{cm}^{-1}$ ) 3010, 2997, 1588, 1548, 1154, 1113, 744.  $\delta_{\text{H}}$  (400 MHz,  $d\text{-CDCl}_3$ )  $\delta$ : 7.62 (d, 2H,  $J = 8.68$  Hz), 7.34-7.40 (m, 3H), 7.05 (dd, 2H,  $J^1 = 2.04$  Hz,  $J^2 = 8.36$  Hz), 7.00 (d, 2H,  $J = 8.64$  Hz), 6.86 (d, 2H,  $J = 8.68$  Hz), 3.88 (s, 3H), 3.82 (s, 3H).  $\delta_{\text{C}}$  (100 MHz,  $d\text{-CDCl}_3$ )  $\delta$ : 160.4, 160.3, 159.5, 158.0, 152.9, 150.9, 130.9, 128.7, 124.5, 122.8, 120.6, 120.3, 116.9, 116.8, 114.8, 114.2, 105.8, 105.5, 73.9, 73.8, 55.5, 55.4. **HRMS** (EI)  $m/z$  for  $\text{C}_{22}\text{H}_{16}\text{FIO}_3$   $[\text{M}]^+$ : calcd. 474.0128; found, 474.0126.

### 1.2.12 Synthesis of 5-chloro-7-iodo-2,3-bis(4-methoxyphenyl)benzo[b]furan (7l)

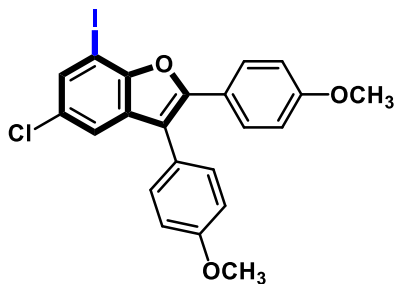

The title compound was prepared using the general procedure and isolated as pale-yellow oil (**68%** yields). **IR** (cast film,  $\text{cm}^{-1}$ ) 3001, 2984, 1584, 1543, 1216, 1128, 857, 687.  $\delta_{\text{H}}$  (400 MHz,  $d\text{-CDCl}_3$ )  $\delta$ : 7.60-7.64 (m, 3H), 7.34-7.40 (m, 3H), 7.00 (d, 2H,  $J = 8.44$  Hz), 6.86 (d, 2H,  $J = 8.68$  Hz), 3.89 (s, 3H), 3.82 (s, 3H).  $\delta_{\text{C}}$  (100 MHz,  $d\text{-CDCl}_3$ )  $\delta$ : 160.3, 159.5, 152.9, 152.6, 132.3, 131.6, 130.9, 129.2, 128.7, 124.3, 122.6, 119.5, 116.2, 114.8, 114.2, 74.8, 55.5, 55.4. **HRMS** (EI)  $m/z$  for  $\text{C}_{22}\text{H}_{16}\text{ClIO}_3$   $[\text{M}]^+$ : calcd. 489.9833; found, 489.9829.

### 1.2.13 Synthesis of 5-chloro-7-iodo-2,3-diphenylbenzo[b]furan (7m)

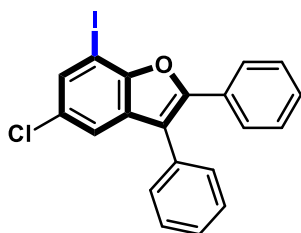

The title compound was prepared using the general procedure and isolated as white solid (**38%** yields). **IR** (cast film,  $\text{cm}^{-1}$ ) 2995, 1604, 1589, 972, 761.  $\delta_{\text{H}}$  (400 MHz,  $d\text{-CDCl}_3$ )  $\delta$ : 7.60-7.70 (m, 3H), 7.40-7.50 (m, 6H), 7.30-7.35 (m, 3H).  $\delta_{\text{C}}$  (100 MHz,  $d\text{-CDCl}_3$ )  $\delta$ : 153.2, 152.6, 132.9, 132.0, 131.2, 129.8, 129.7, 129.5, 129.4, 129.3, 128.7, 128.4, 125.7, 119.9, 118.1, 75.0. **M.p.**: 105-106 °C. **HRMS** (EI)  $m/z$  for  $\text{C}_{20}\text{H}_{12}\text{ClIO}$   $[\text{M}]^+$ : calcd. 429.9621; found, 429.9618.

### 1.2.14 Synthesis of 2-benzyl-5-chloro-7-iodo-3-phenylbenzo[b]furan (7n)

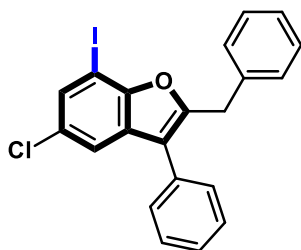

The title compound was prepared using the general procedure and isolated as pale-yellow oil (**66%** yields). **IR** (cast film,  $\text{cm}^{-1}$ ) 3024, 2994, 1599, 1584, 861, 782.  $\delta_{\text{H}}$  (400 MHz,  $d\text{-CDCl}_3$ )  $\delta$ :

7.62 (d, 1H,  $J = 1.72$  Hz), 7.39-7.55 (m, 6H), 7.23-7.35 (m, 5H), 4.22 (s, 2H).  $\delta_c$  (100 MHz,  $d\text{-CDCl}_3$ )  $\delta$ : 154.9, 153.6, 137.3, 132.4, 131.6, 129.7, 129.3, 129.2, 129.1, 128.9, 128.7, 128.0, 126.9, 119.7, 119.1, 75.1, 33.1. **HRMS** (EI)  $m/z$  for  $\text{C}_{21}\text{H}_{14}\text{ClIO}$   $[\text{M}]^+$ : calcd. 443.9778; found, 443.9775.

### 1.2.15 Synthesis of 5-bromo-7-iodo-2,3-bis(4-methoxyphenyl)benzo[*b*]furan (7p)

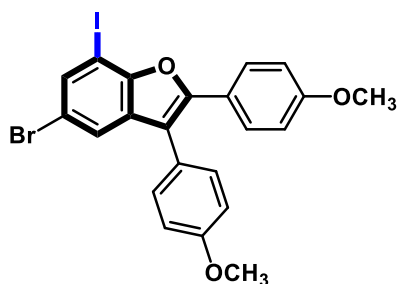

The title compound was prepared using the general procedure and isolated as pale-yellow oil (71% yields).

**IR** (cast film,  $\text{cm}^{-1}$ ) 2998, 1605, 1592, 1281, 1186, 864, 731.  $\delta_H$  (400 MHz,  $d\text{-CDCl}_3$ )  $\delta$ : 7.74 (d, 1H,  $J = 1.6$  Hz),

7.61 (d, 2H,  $J = 8.8$  Hz), 7.49 (d, 1H,  $J = 1.5$  Hz), 7.35 (d, 2H, (s, 2H,  $J = 8.56$  Hz), 7.00 (d, 2H,  $J = 8.6$  Hz), 6.86 (d, 2H,  $J = 9.43$  Hz), 3.88 (s, 3H), 3.82 (s, 3H).  $\delta_c$  (100 MHz,  $d\text{-CDCl}_3$ )  $\delta$ : 160.3, 159.6, 153.3, 152.4, 134.7, 132.3, 130.9, 128.7, 128.6, 124.2, 122.5, 116.5, 116.1, 114.8, 114.2, 75.4, 55.5, 55.4. **HRMS** (EI)  $m/z$  for  $\text{C}_{22}\text{H}_{16}\text{BrIO}_3$   $[\text{M}]^+$ : calcd. 533.9327; found, 533.9322.

### 1.2.16 Synthesis of methyl 7-iodo-2,3-bis(4-methoxyphenyl)benzo[*b*]furan-5-carboxylate (7q)

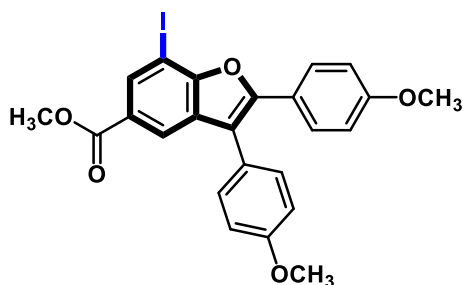

The title compound was prepared using the general procedure and isolated as colorless oil (83% yields). **IR** (cast film,  $\text{cm}^{-1}$ ) 3017, 2989, 1756,

1612, 1588, 1260, 1228, 837, 731.  $\delta_H$  (400 MHz,  $d\text{-CDCl}_3$ )  $\delta$ : 8.36 (s, 1H), 8.01 (s, 1H), 7.63 (d, 2H,  $J =$

8.44 Hz), 7.39 (d, 2H,  $J = 8.28$  Hz), 7.02 (d, 2H,  $J = 8.24$  Hz), 6.87 (d, 2H,  $J^1 = 8.48$  Hz),

3.91 (s, 3H), 3.89 (s, 3H), 3.82 (s, 3H).  $\delta_c$  (100 MHz, *d*-CDCl<sub>3</sub>)  $\delta$ : 166.3, 160.3, 159.6, 156.7, 152.4, 134.6, 131.0, 130.7, 128.7, 127.0, 124.2, 122.5, 122.2, 116.9, 114.9, 114.2, 74.5, 55.5, 55.4, 52.4. **HRMS** (EI) *m/z* for C<sub>24</sub>H<sub>19</sub>IO<sub>5</sub> [M]<sup>+</sup>: calcd. 514.0277; found, 514.0273.

### 1.2.17 Synthesis of 7-chloro-2,3-bis(4-methoxyphenyl)benzo[*b*]furan (7r)

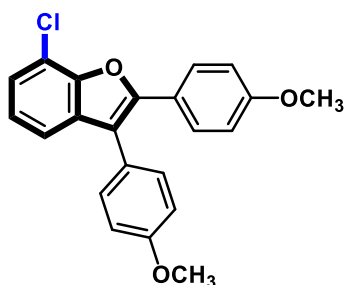

The title compound was prepared using the general procedure and isolated as colorless oil (**77%** yields). **IR** (cast film, cm<sup>-1</sup>) 3013, 2984, 1609, 1591, 1268, 1153, 855, 694.  $\delta_H$  (400 MHz, *d*-CDCl<sub>3</sub>)  $\delta$ : 7.63 (d, 2H, *J* = 8.64 Hz), 7.39 (d, 2H, *J* = 8.36 Hz), 7.34 (d, 1H, *J* = 7.72 Hz), 7.28 (dd, 1H, *J*<sup>1</sup> = 7.76 Hz, *J*<sup>2</sup> = 6.8 Hz), 7.15 (t, 1H, *J* = 7.76 Hz), 7.01 (d, 2H, *J* = 8.4 Hz), 6.86 (d, 2H, *J* = 8.64 Hz), 3.89 (s, 3H), 3.82 (s, 3H).  $\delta_c$  (100 MHz, *d*-CDCl<sub>3</sub>)  $\delta$ : 16.1, 159.4, 151.6, 149.7, 132.5, 131.0, 128.7, 124.8, 124.4, 123.8, 123.0, 118.4, 116.6, 116.2, 114.7, 114.1, 55.5, 55.4. **HRMS** (EI) *m/z* for C<sub>22</sub>H<sub>17</sub>ClO<sub>3</sub> [M]<sup>+</sup>: calcd. 364.0866; found, 364.0865.

### 1.2.18 Synthesis of 7-chloro-2,3-diphenylbenzo[*b*]furan (7s)

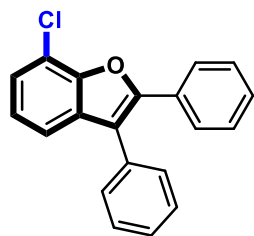

The title compound was prepared using the general procedure for palladium-catalyzed regioselective domino  $\alpha$ -arylation/intramolecular O-arylation reaction and isolated as white solid (**71%** yields). The spectroscopic data for this compound are matched the previous report by *Chem. Commun.*, **2013**, 49, 6611-6613.

### 1.2.19 Synthesis of 7-bromo-2,3-bis(4-methoxyphenyl)benzo[b]furan (7t)

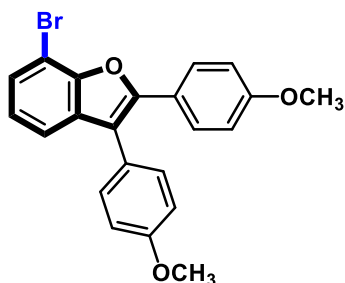

The title compound was prepared using the general procedure and isolated as pale-yellow oil (73% yields). IR (cast film,  $\text{cm}^{-1}$ ) 3005, 2998, 1601, 1576, 1291, 1183, 911, 844.  $\delta_{\text{H}}$  (400 MHz,  $d\text{-CDCl}_3$ )  $\delta$ : 7.63 (d, 2H,  $J = 8.88$  Hz), 7.37-7.45 (m, 4H), 7.09 (t, 1H,  $J = 7.76$  Hz), 7.00 (d, 2H,  $J = 8.68$  Hz), 6.86 (d, 2H,  $J = 8.88$  Hz), 3.89 (s, 3H), 3.82 (s, 3H).  $\delta_{\text{C}}$  (100 MHz,  $d\text{-CDCl}_3$ )  $\delta$ : 160.1, 159.4, 151.5, 151.1, 132.1, 131.0, 128.7, 127.2, 124.8, 124.2, 123.0, 119.0, 116.3, 114.7, 114.1, 103.9, 55.5, 55.4. HRMS (EI)  $m/z$  for  $\text{C}_{22}\text{H}_{17}\text{BrO}_3$   $[\text{M}]^+$ : calcd. 408.0361; found, 408.0355.

### 1.2.20 Synthesis of 7-bromo-2,3-diphenylbenzo[b]furan (7u)

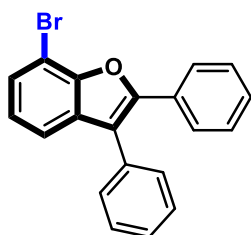

The title compound was prepared using the general procedure for palladium-catalyzed regioselective domino  $\alpha$ -arylation/intramolecular O-arylation reaction and isolated as white solid (72% yields). The spectroscopic data for this compound are matched the previous report by *Chem. Commun.*, **2013**, 49, 6611-6613.

### 1.2.21 Synthesis of 1-(5-chloro-2,3-diiodophenyl)-1-(4-methoxyphenyl)propan-2-one

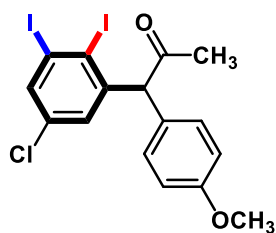

The title compound was prepared using the general procedure and isolated as pale-yellow oil (53% yields). IR (cast film,  $\text{cm}^{-1}$ ) 3012, 2985, 1715, 1625, 1601, 1253, 1107, 837, 721.  $\delta_{\text{H}}$  (400 MHz,  $d\text{-CDCl}_3$ )  $\delta$ : 7.78 (d, 1H,  $J = 2.2$  Hz), 7.12 (d, 2H,  $J = 8.56$  Hz), 6.94 (d, 2H,  $J = 8.6$  Hz), 6.78 (d, 1H,  $J = 2.2$  Hz), 5.55 (s, 1H), 3.83 (s, 3H), 2.30 (s, 3H).  $\delta_{\text{C}}$  (100 MHz,  $d\text{-CDCl}_3$ )  $\delta$ : 205.2, 159.6, 146.8, 137.9, 135.3, 130.8, 129.6, 128.2, 115.0,

113.4, 110.8, 71.9, 55.5, 30.9. **HRMS** (ESI)  $m/z$  for  $C_{16}H_{14}ClI_2O_2$   $[M+H]^+$ : calcd. 526.8772; found, 526.8765.



1.3.2  $^{13}\text{C}$ -NMR of 7-iodo-2,3-bis(4-methoxyphenyl)benzofuran (7a) in  $d\text{-CDCl}_3$  at 25  $^\circ\text{C}$ .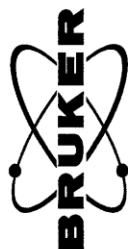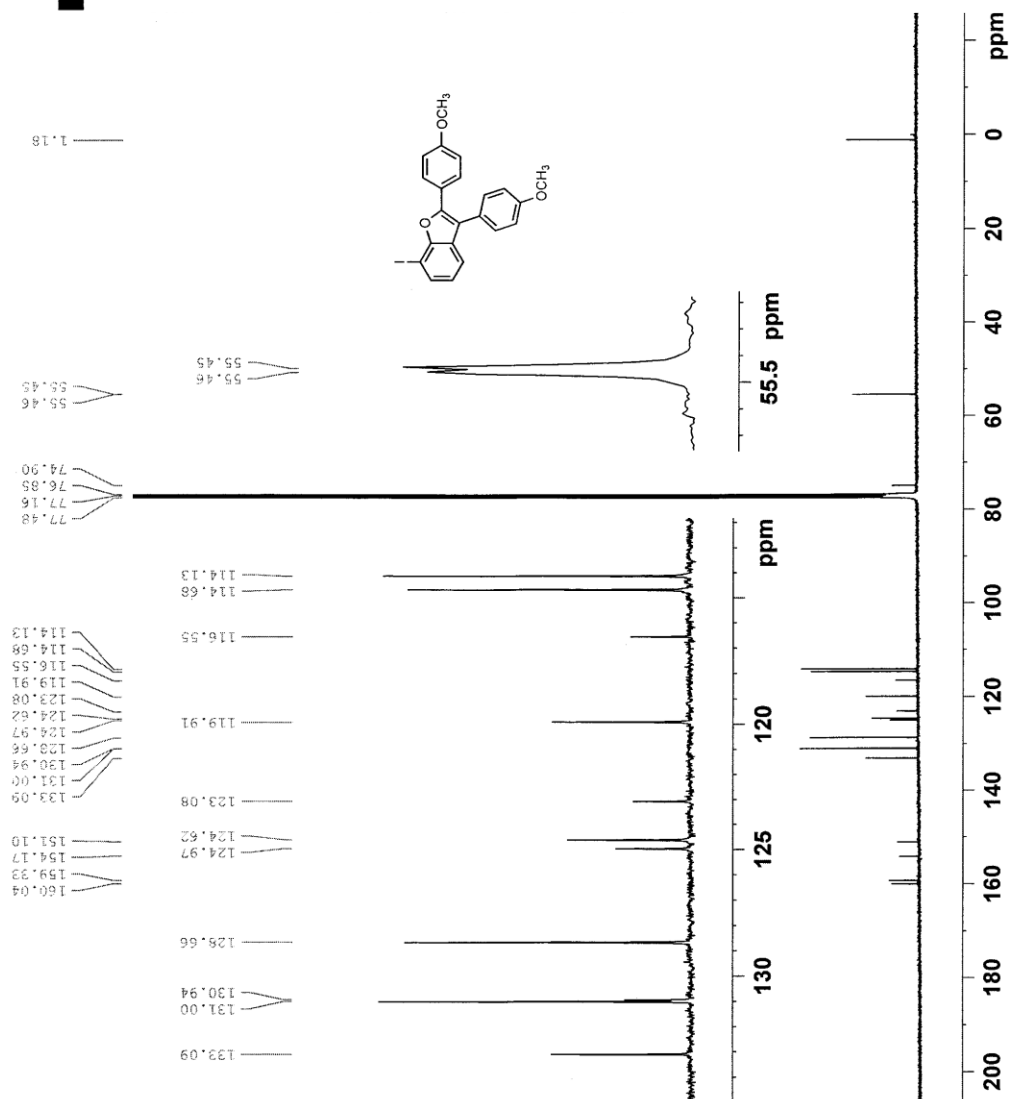



1.3.3  $^1\text{H-NMR}$  of 7-iodo-2,3-diphenylbenzofuran (7b) in  $d\text{-CDCl}_3$  at 25 °C.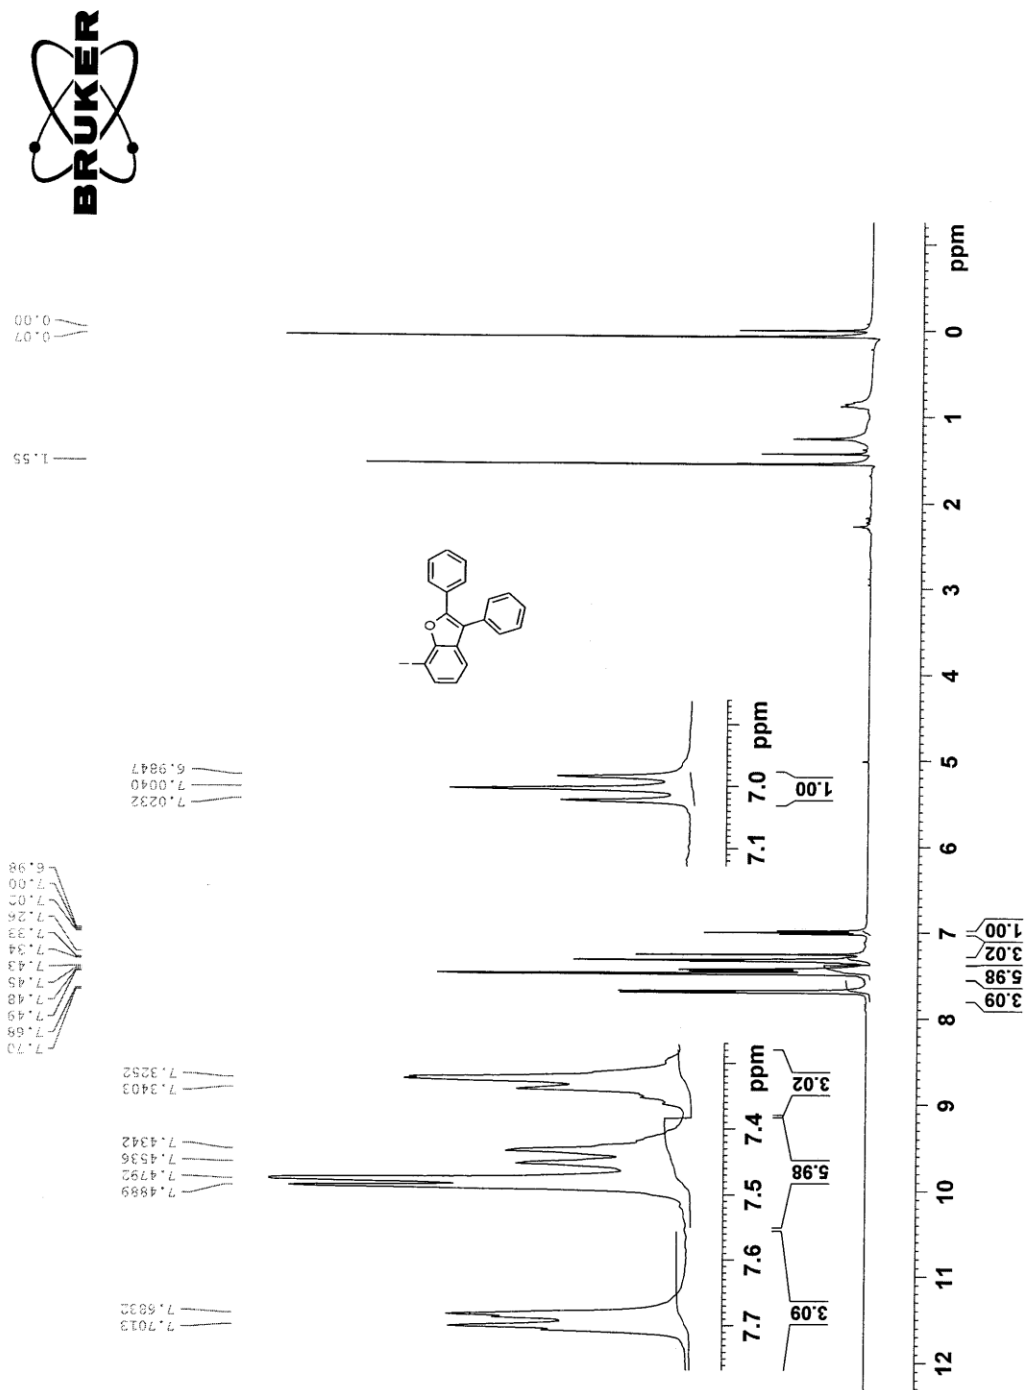



**1.3.5  $^1\text{H-NMR}$  of 2-(4-chlorophenyl)-7-iodo-3-phenylbenzofuran (7c) in  $d\text{-CDCl}_3$  at  $25\text{ }^\circ\text{C}$ .**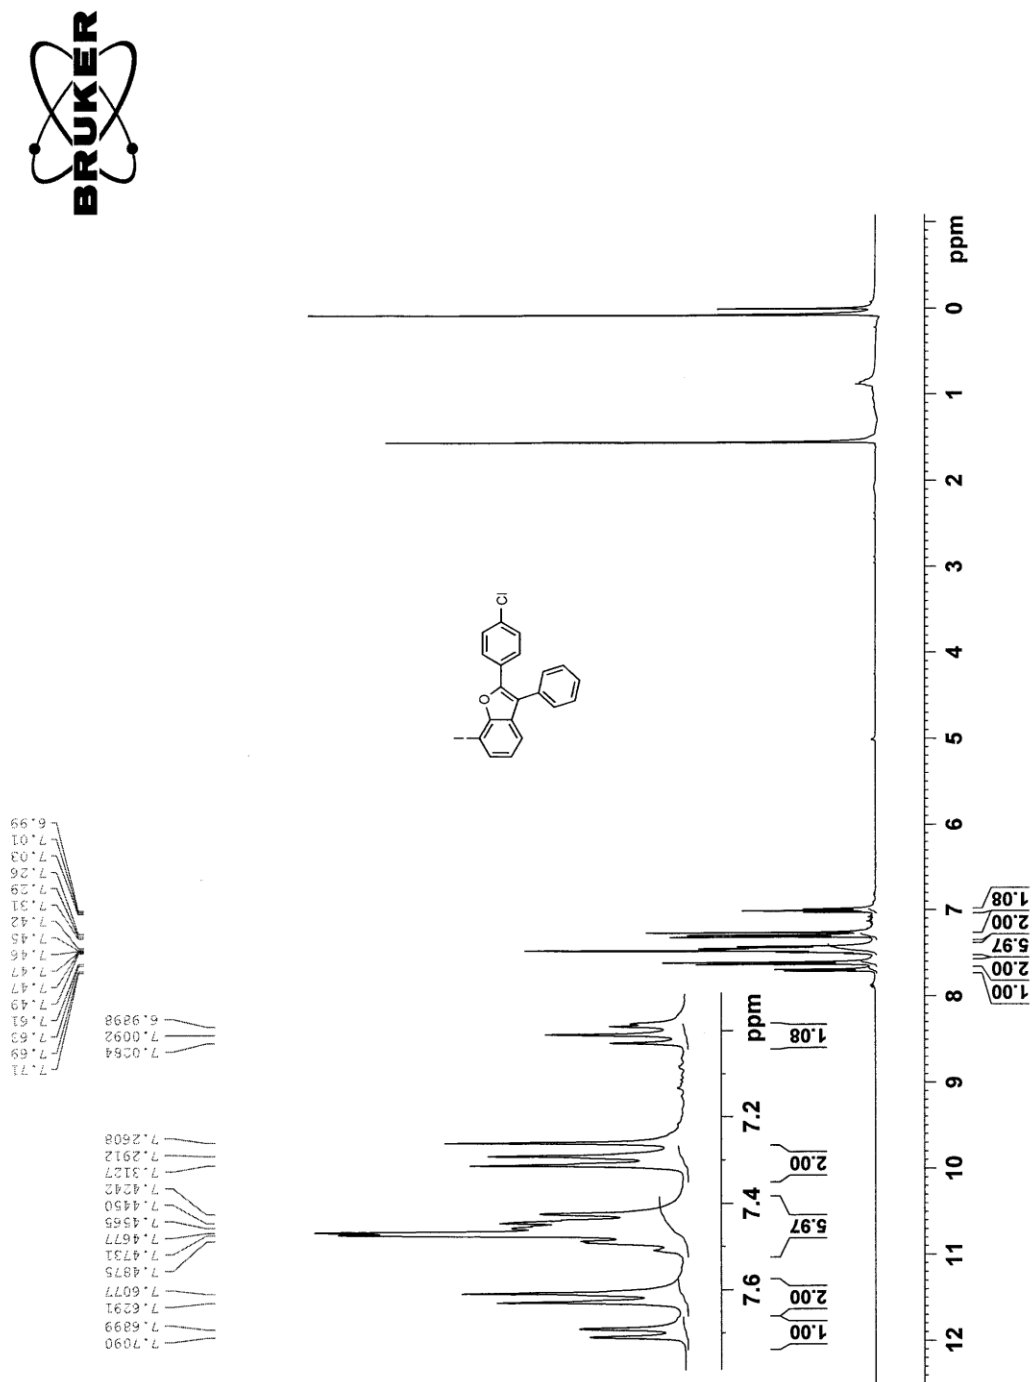

1.3.6  $^{13}\text{C}$ -NMR of 2-(4-chlorophenyl)-7-iodo-3-phenylbenzofuran (7c) in  $d\text{-CDCl}_3$  at  $25\text{ }^\circ\text{C}$ .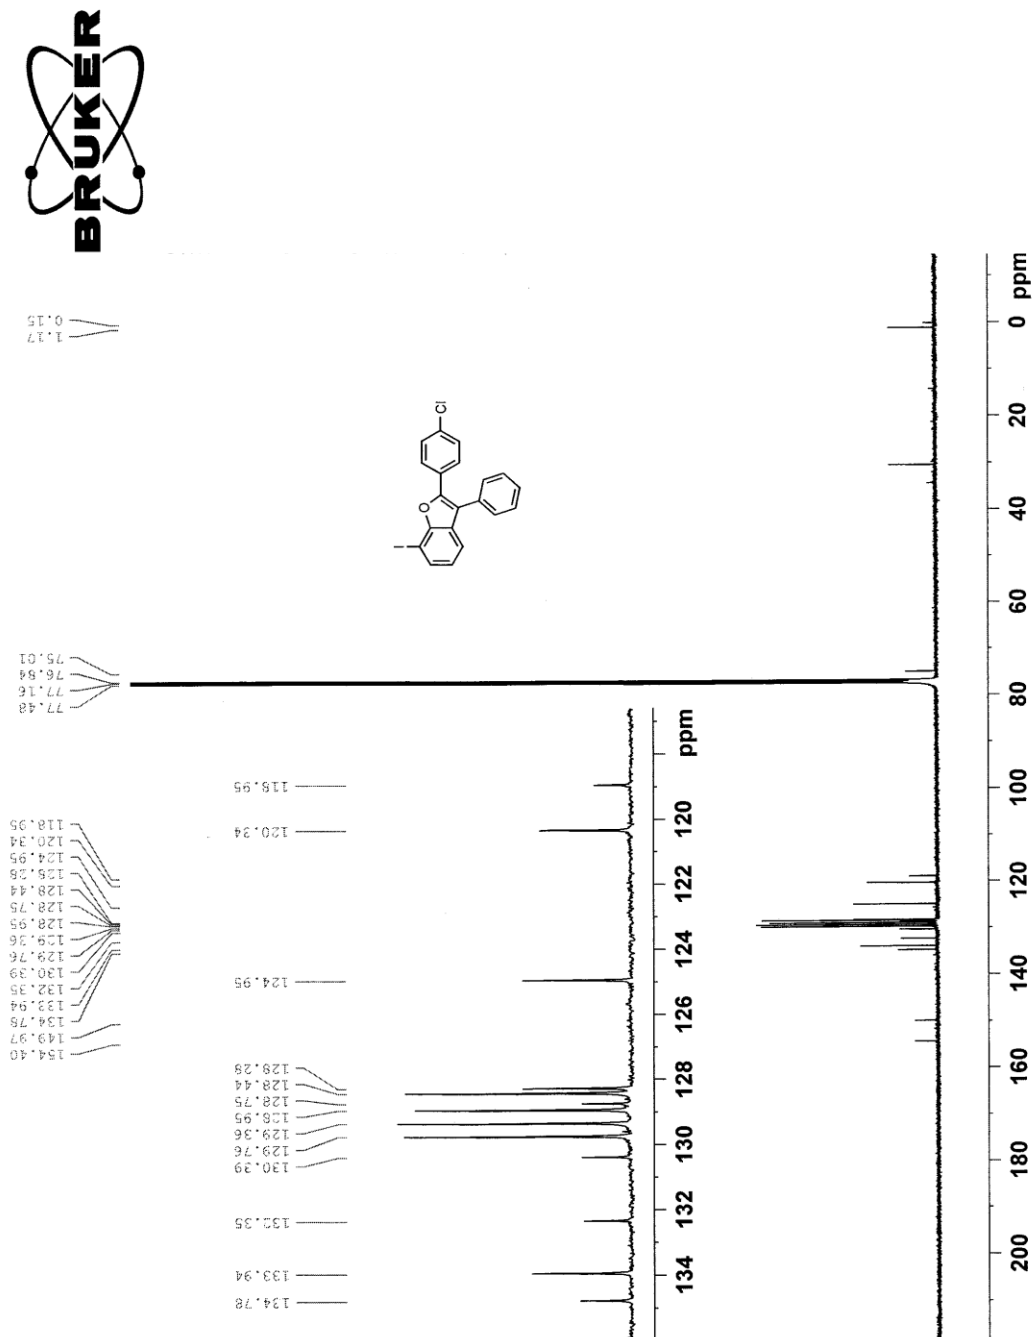

1.3.7 <sup>1</sup>H-NMR of 7-iodo-3-(4-methoxyphenyl)-2-methylbenzofuran (7d) in d-CDCl<sub>3</sub> at 25 °C

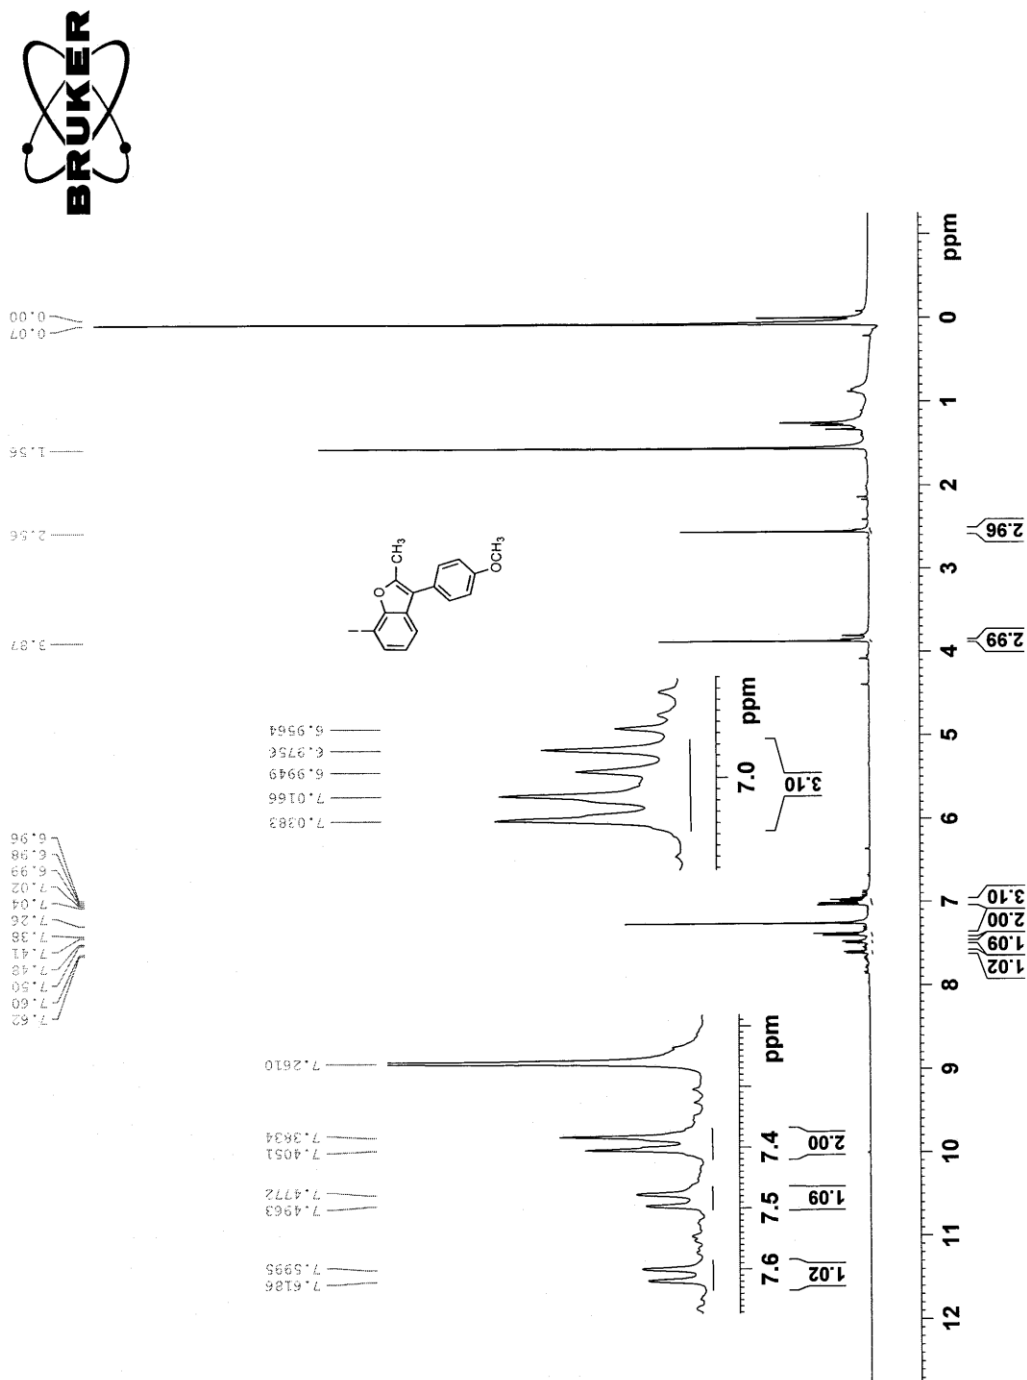









1.3.11  $^1\text{H-NMR}$  of 7-iodo-5-methyl-2,3-diphenylbenzofuran (7f) in  $d\text{-CDCl}_3$  at 25  $^\circ\text{C}$ .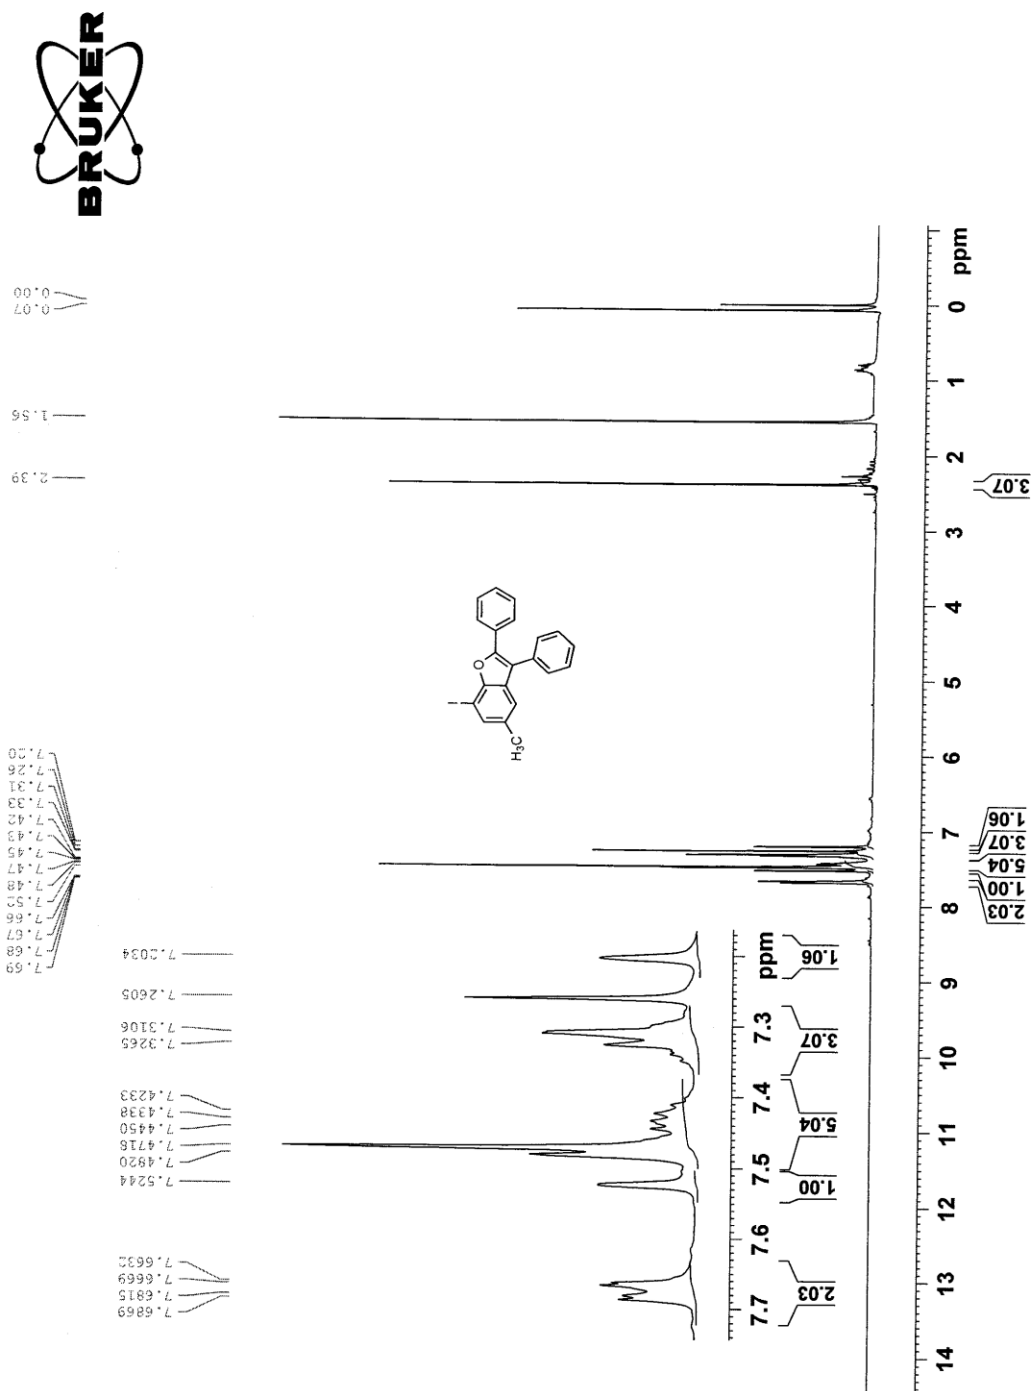

1.3.12  $^{13}\text{C}$ -NMR of 7-iodo-5-methyl-2,3-diphenylbenzofuran (7f) in  $d\text{-CDCl}_3$  at 25  $^\circ\text{C}$ .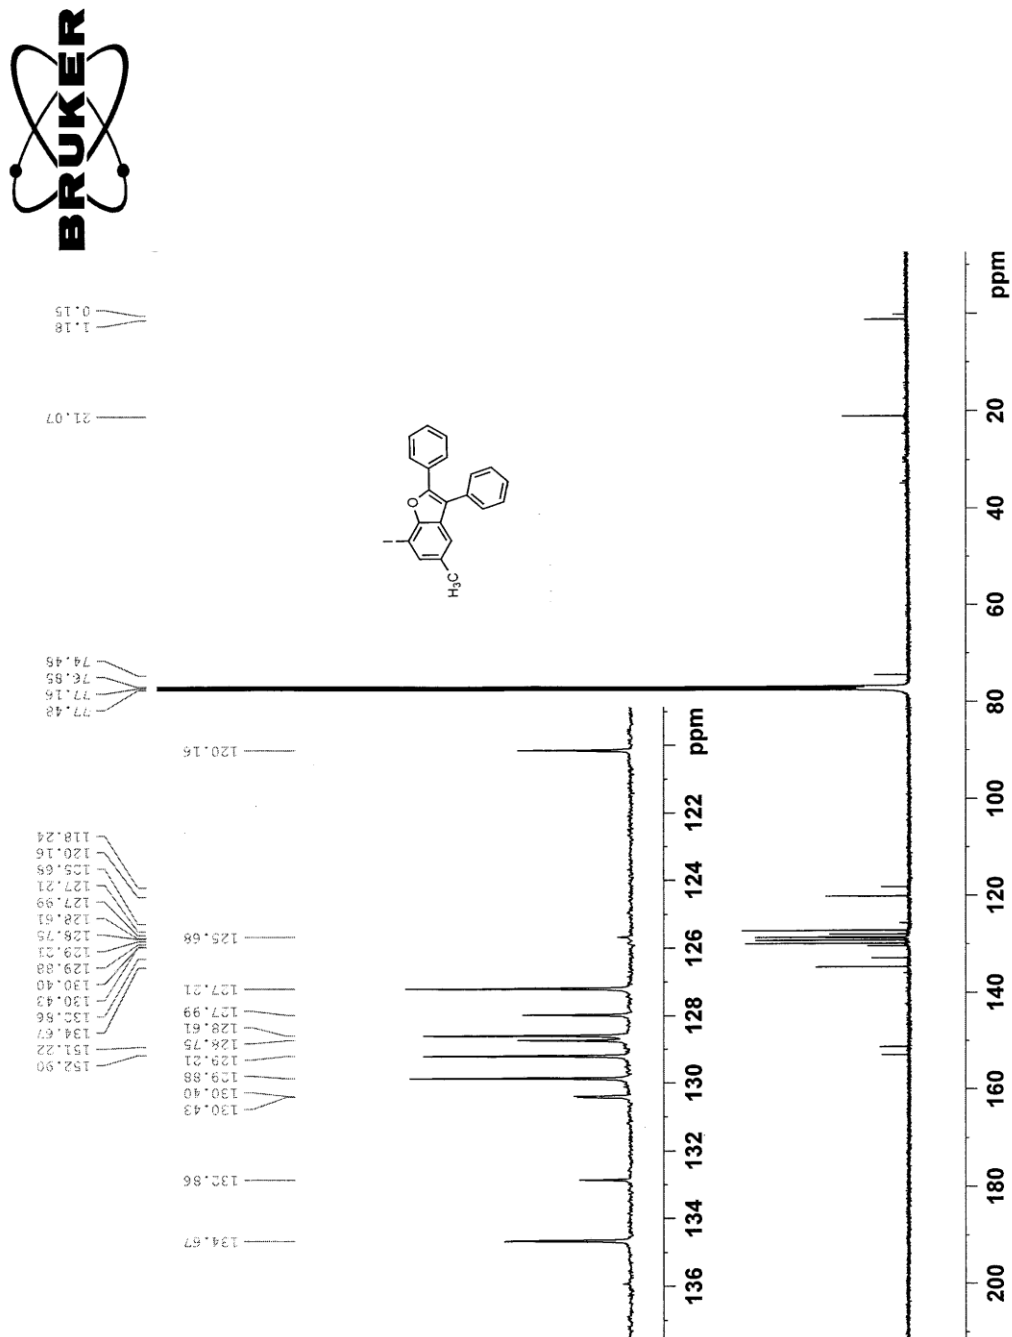

1.3.13 <sup>1</sup>H-NMR of 2-(4-chlorophenyl)-7-iodo-5-methyl-3-phenylbenzofuran (7g) in d-CDCl<sub>3</sub> at 25 °C.

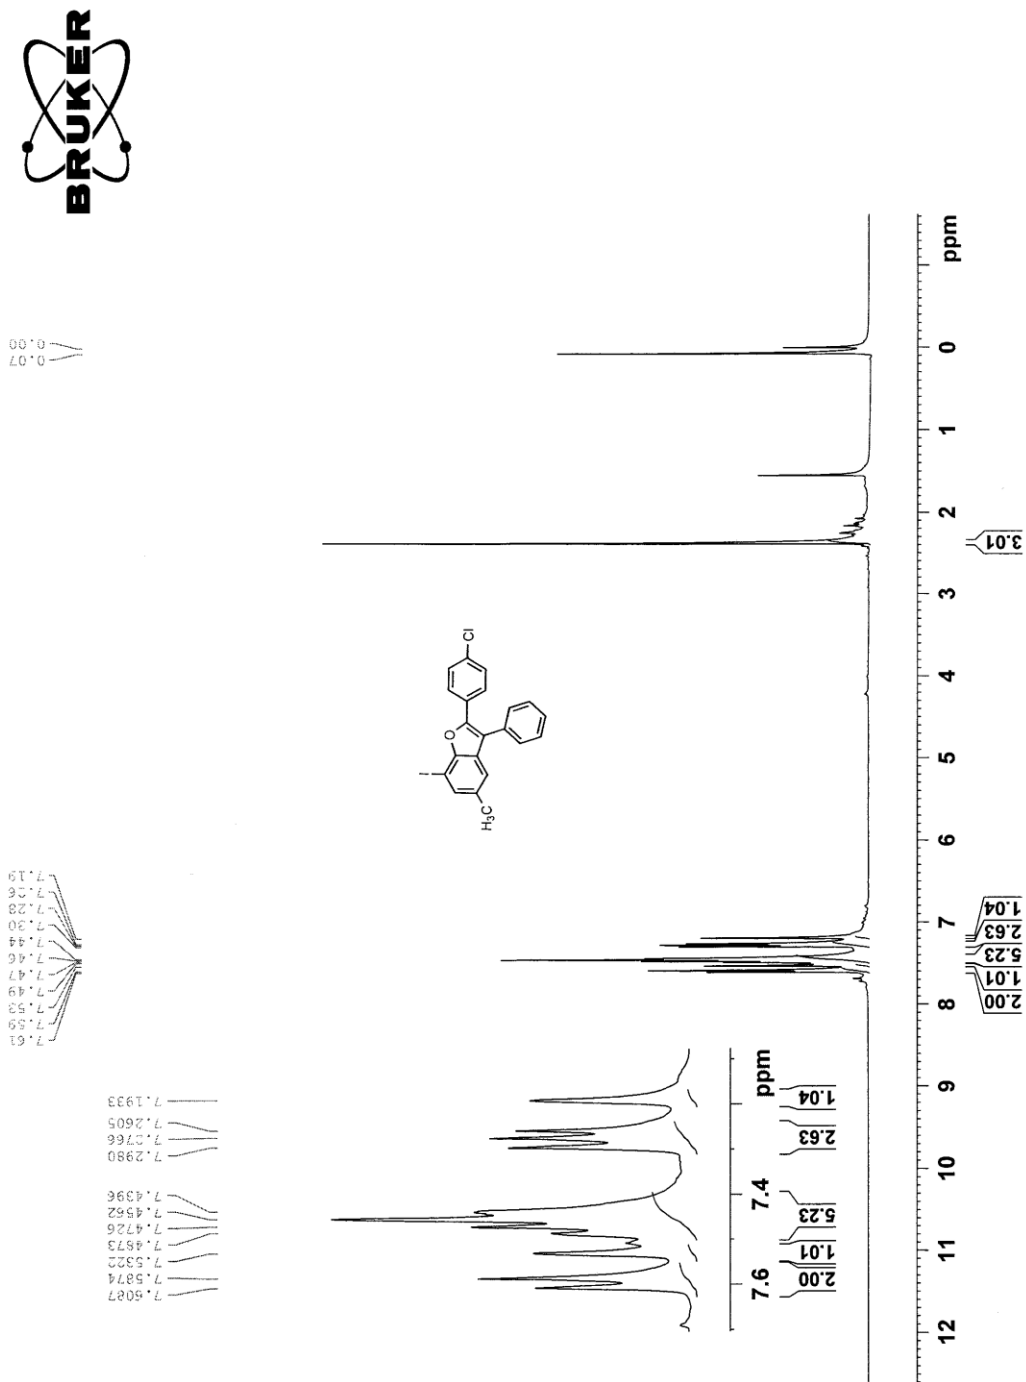

**1.3.14  $^{13}\text{C}$ -NMR of 2-(4-chlorophenyl)-7-iodo-5-methyl-3-phenylbenzofuran (7g) in  $d\text{-CDCl}_3$  at 25 °C.**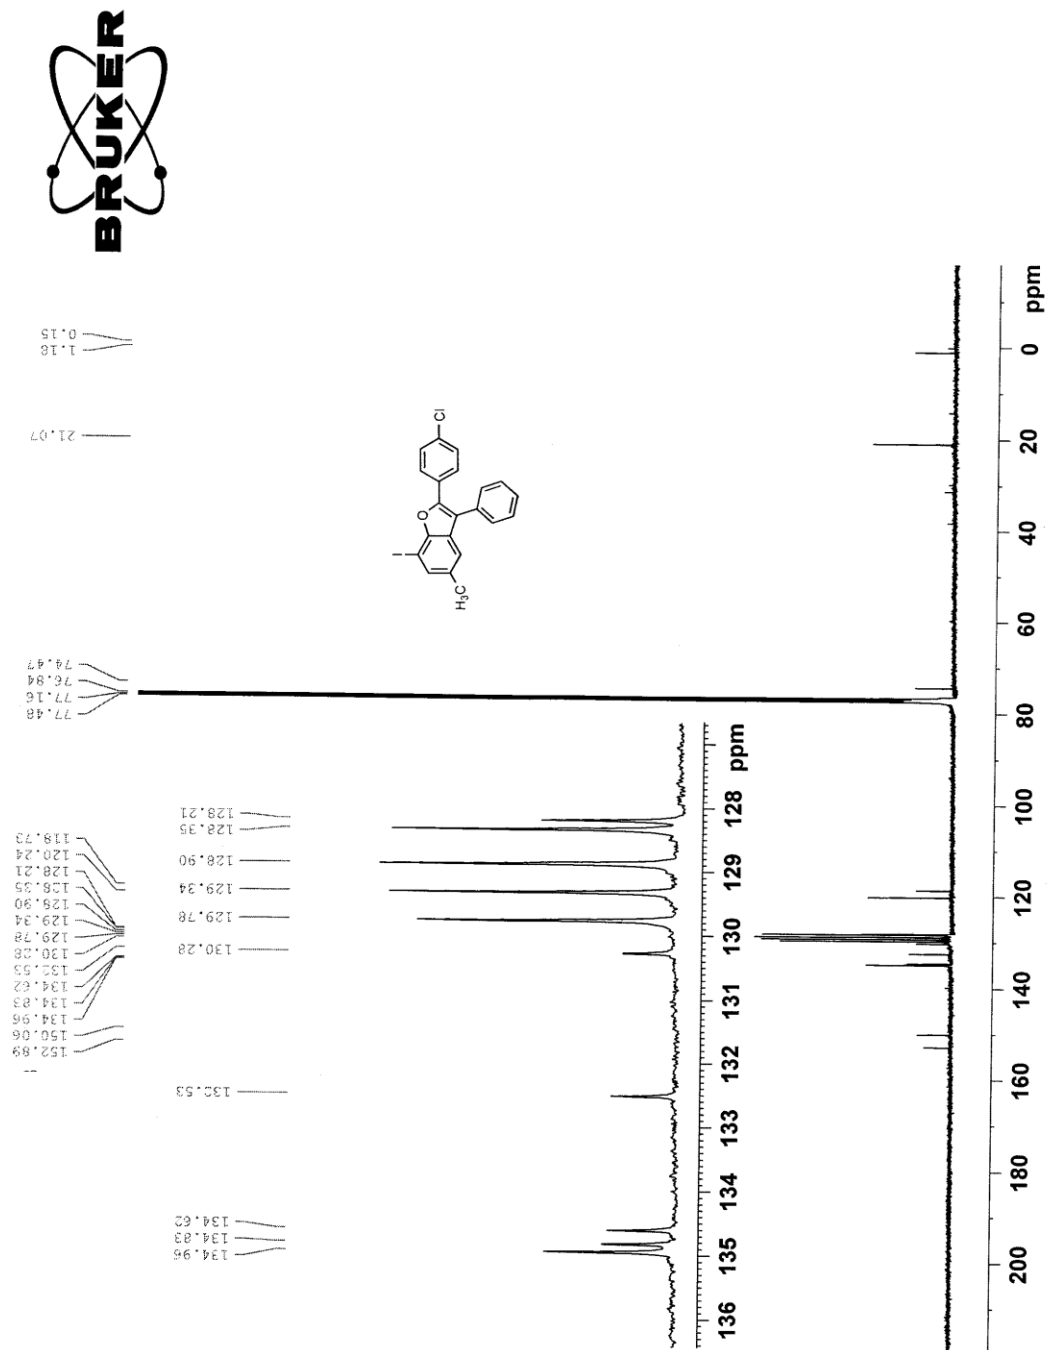

1.3.15  $^1\text{H-NMR}$  of 7-iodo-5-methoxy-2,3-bis(4-methoxyphenyl)benzofuran (7h) in  $d\text{-CDCl}_3$  at 25 °C.

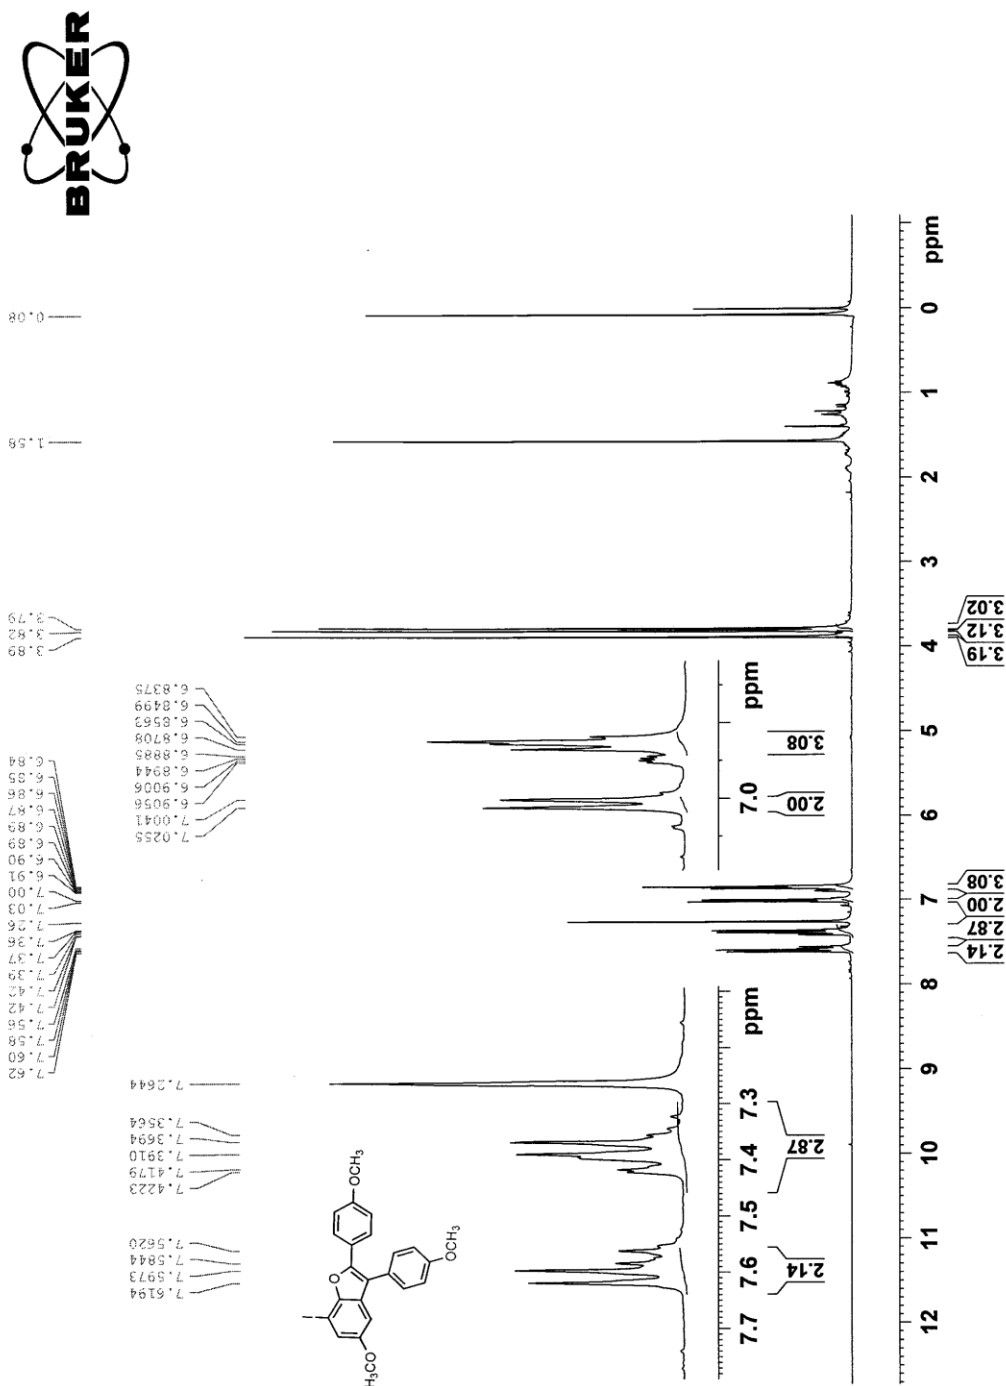

**1.3.16**  $^{13}\text{C}$ -NMR of 7-iodo-5-methoxy-2,3-bis(4-methoxyphenyl)benzofuran (**7h**) in  $d\text{-CDCl}_3$  at 25 °C.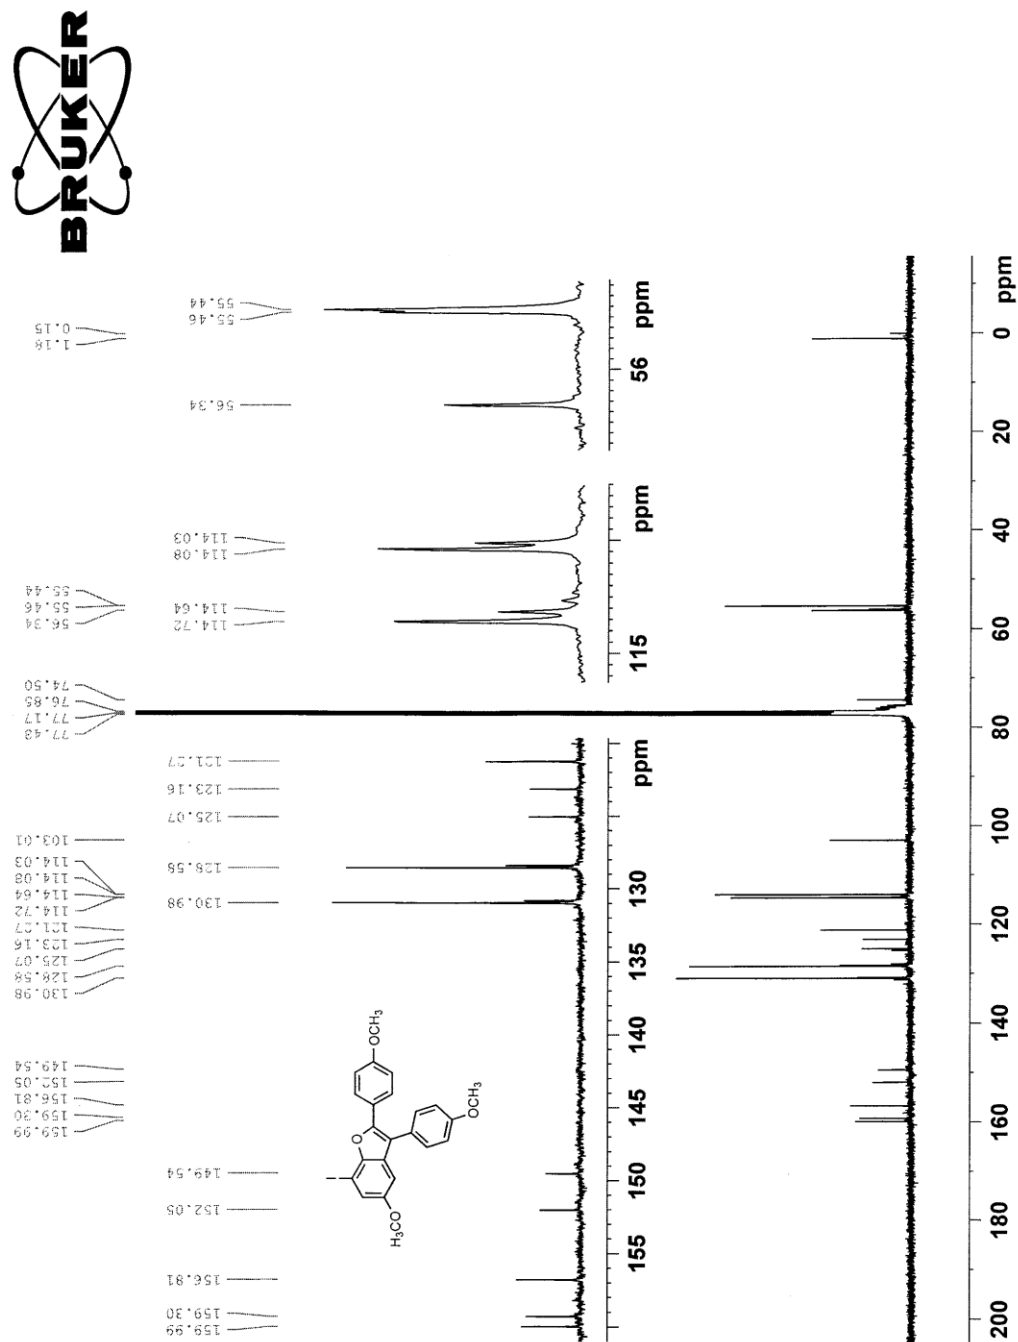

**1.3.17  $^1\text{H-NMR}$  of 7-iodo-5-methoxy-2,3-diphenylbenzofuran (7i) in  $d\text{-CDCl}_3$  at  $25^\circ\text{C}$ .**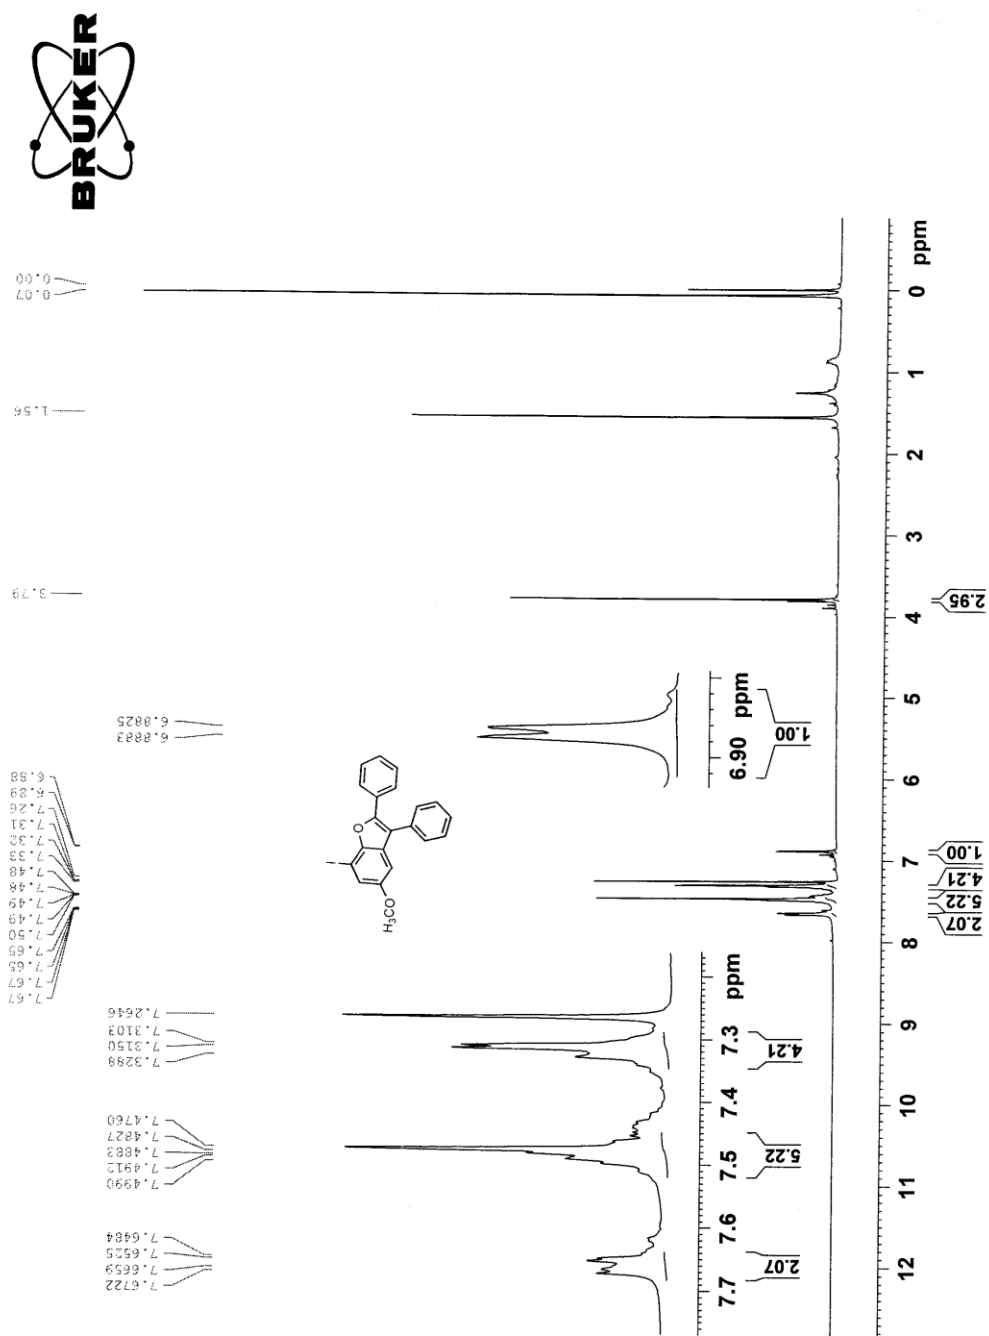

**1.3.18**  $^{13}\text{C}$ -NMR of 7-iodo-5-methoxy-2,3-diphenylbenzofuran (**7i**) in  $d\text{-CDCl}_3$  at  $25\text{ }^\circ\text{C}$ .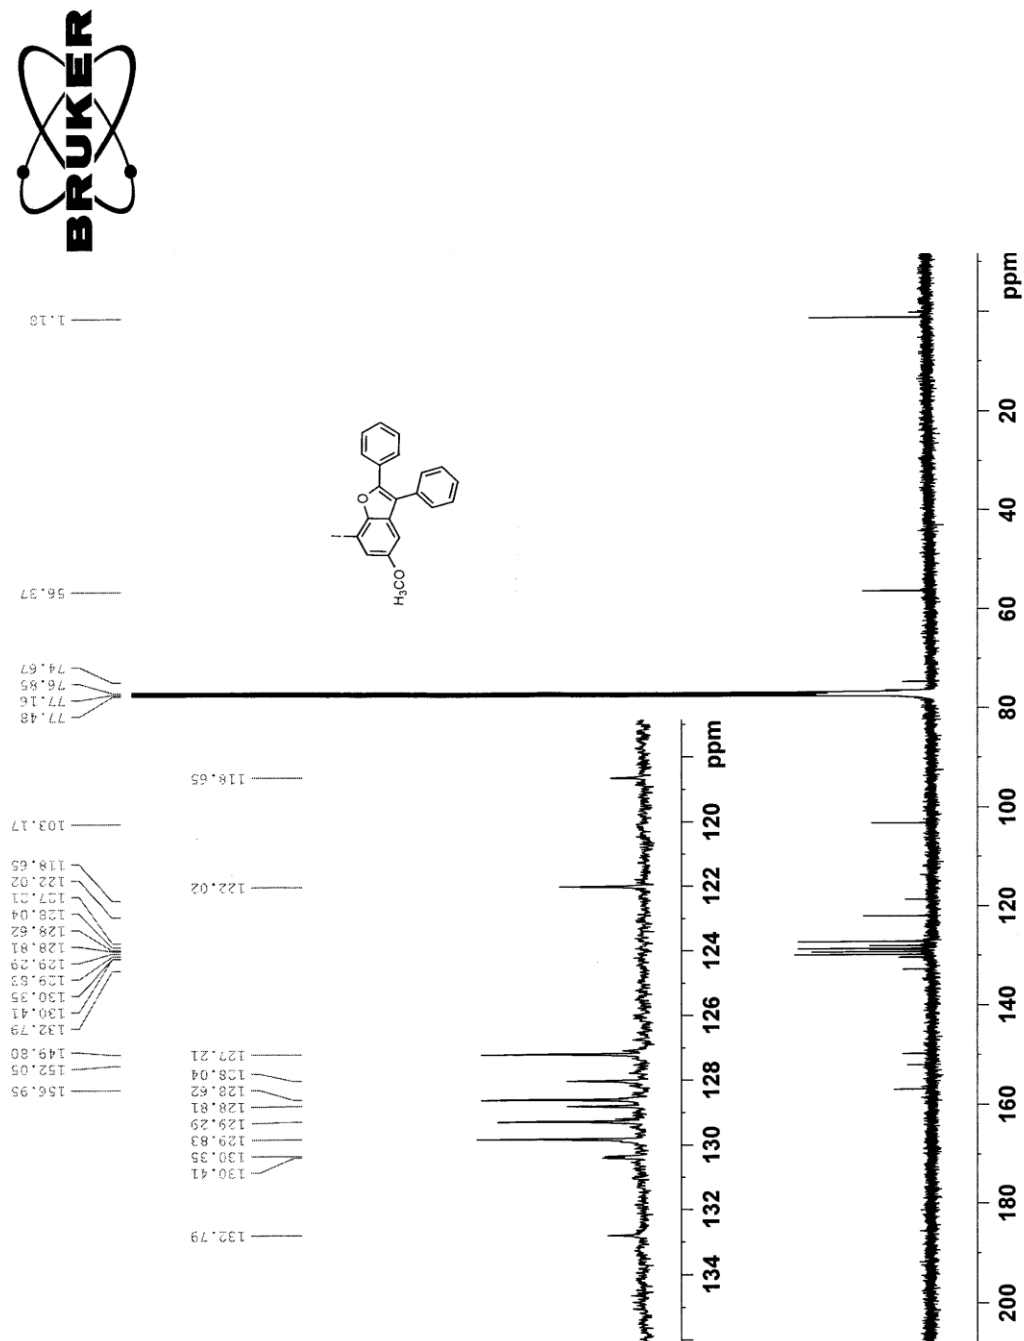



**1.3.19  $^1\text{H-NMR}$  of 7-iodo-5-methoxy-3-(4-methoxyphenyl)-2-methylbenzofuran (7j) in  $d\text{-CDCl}_3$  at 25 °C.**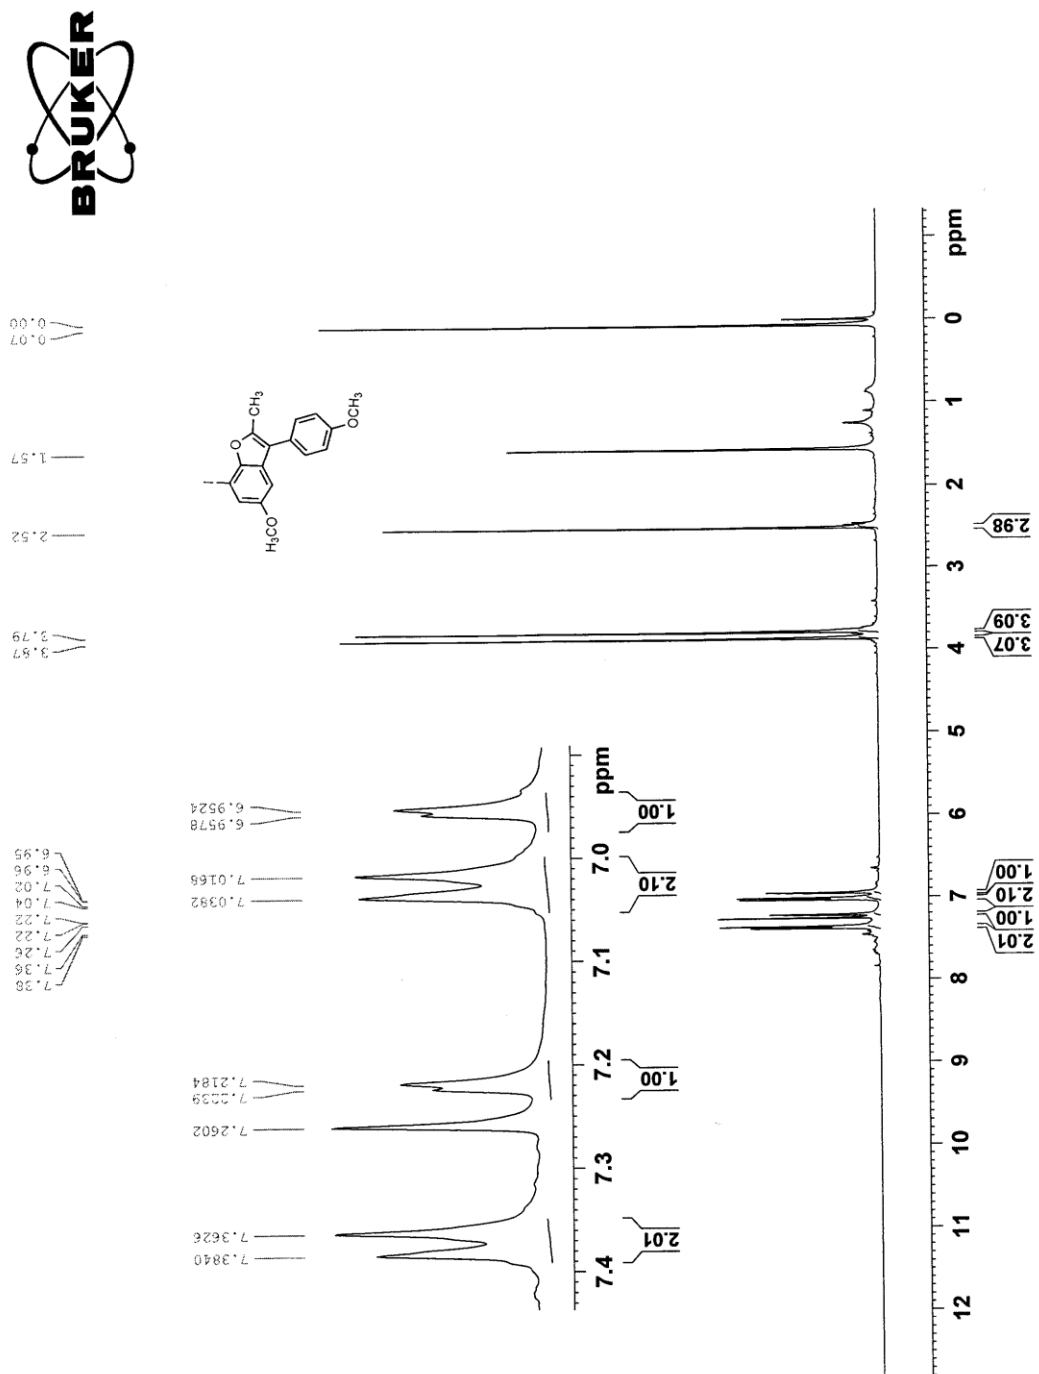



**1.3.21  $^1\text{H-NMR}$  of 5-fluoro-7-iodo-2,3-bis(4-methoxyphenyl)benzofuran in  $d\text{-CDCl}_3$  at  $25^\circ\text{C}$** 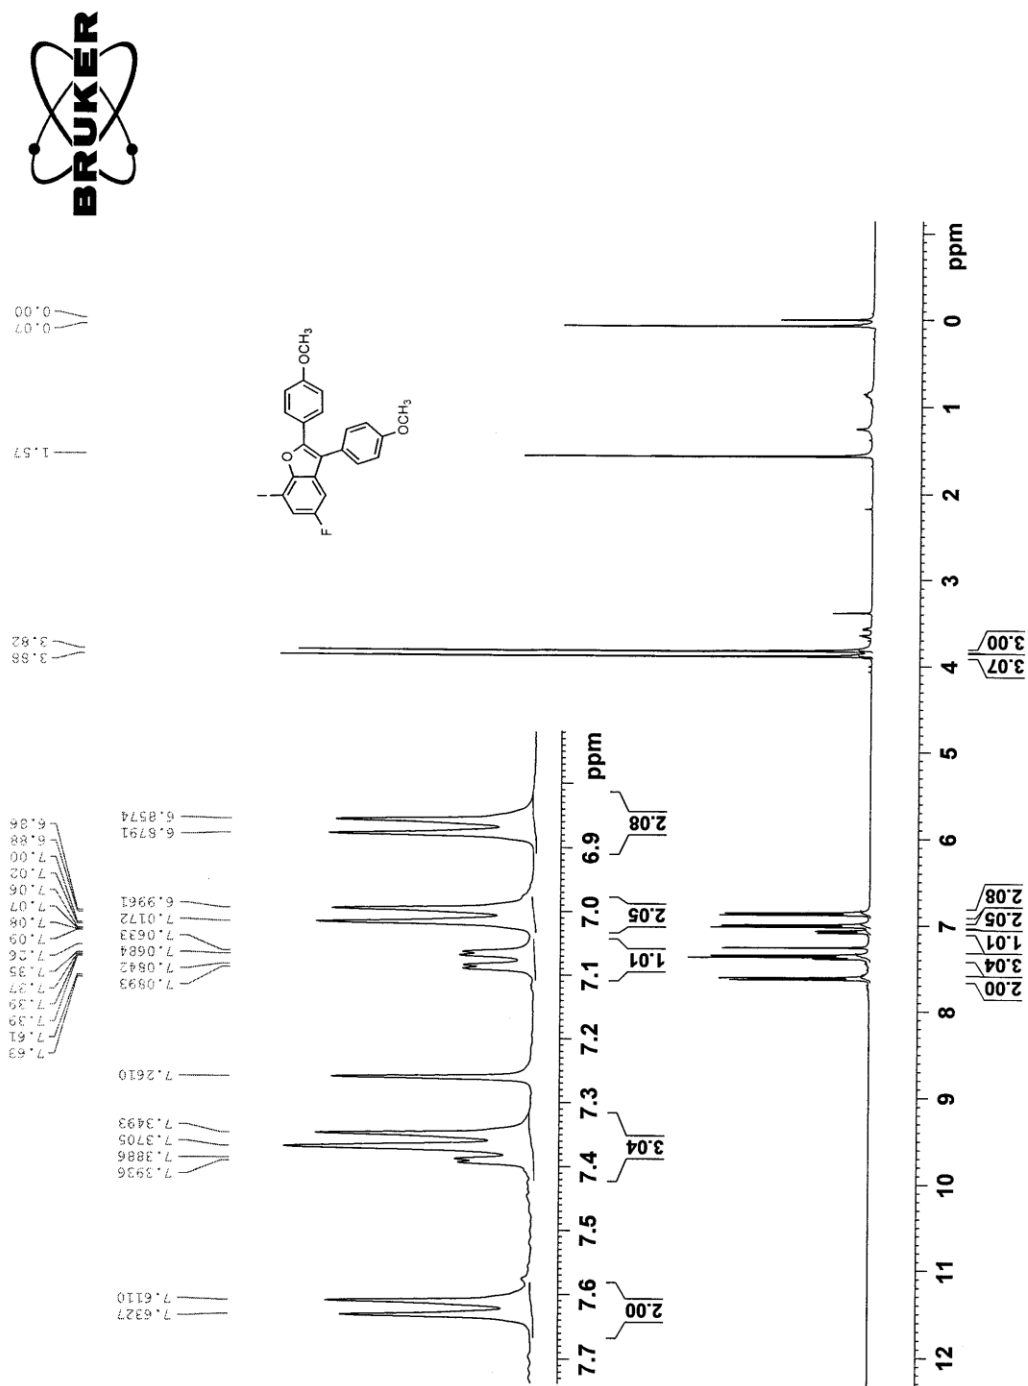

1.3.22  $^{13}\text{C}$ -NMR of 5-fluoro-7-iodo-2,3-bis(4-methoxyphenyl)benzofuran (7k) in  $d\text{-CDCl}_3$  at 25 °C.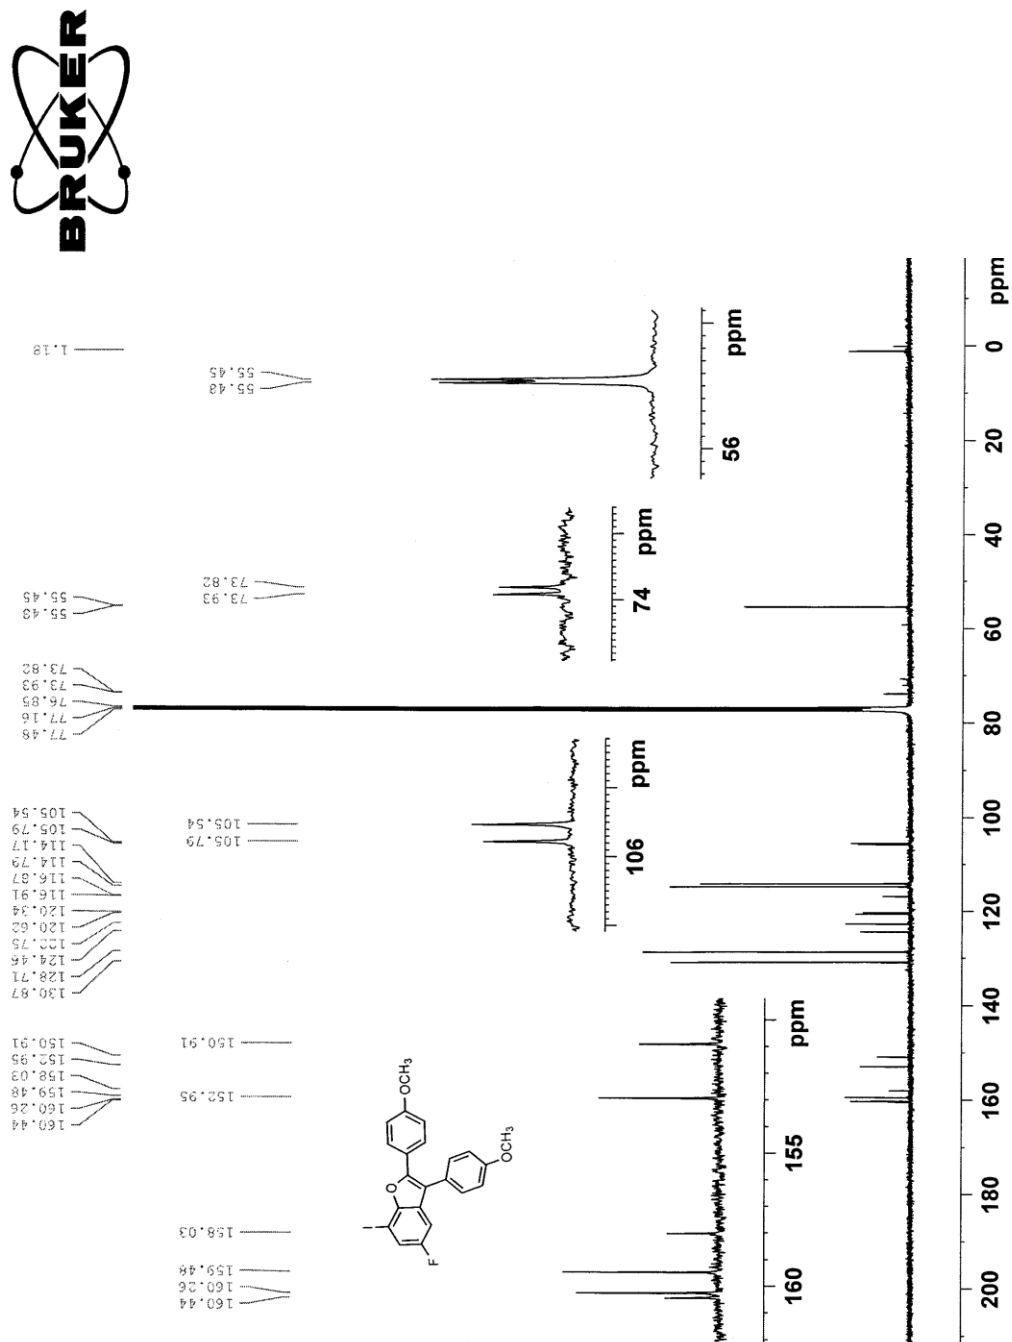

**1.3.23  $^1\text{H-NMR}$  of 5-chloro-7-iodo-2,3-bis(4-methoxyphenyl)benzofuran (7I) in  $d\text{-CDCl}_3$  at 25 °C**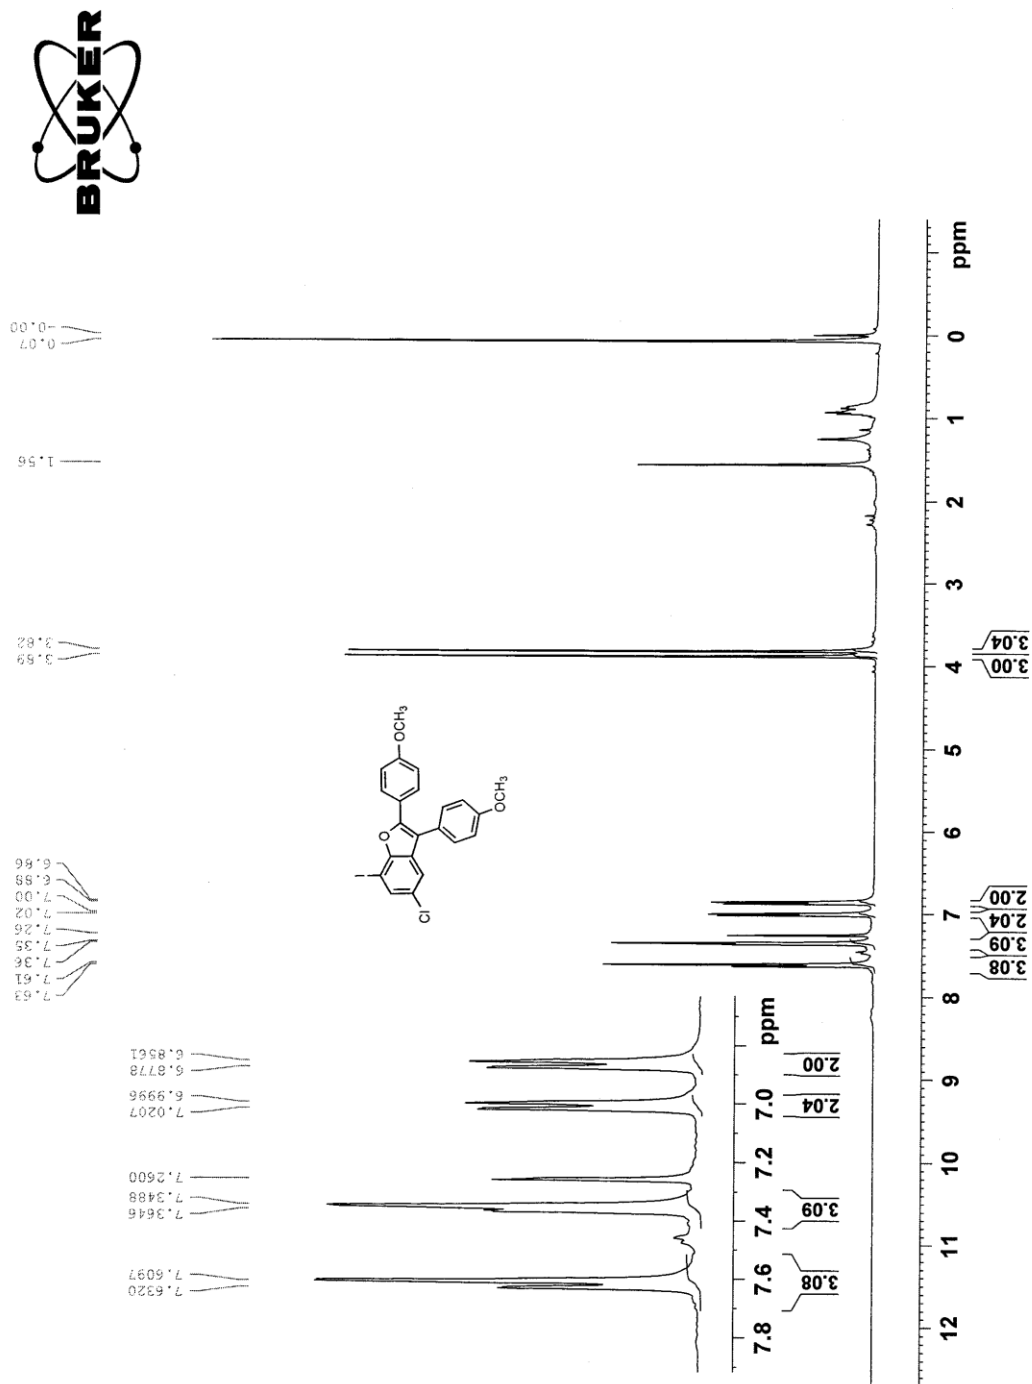

**1.3.24**  $^{13}\text{C}$ -NMR of 5-chloro-7-iodo-2,3-bis(4-methoxyphenyl)benzofuran (**7l**) in  $d\text{-CDCl}_3$  at 25 °C.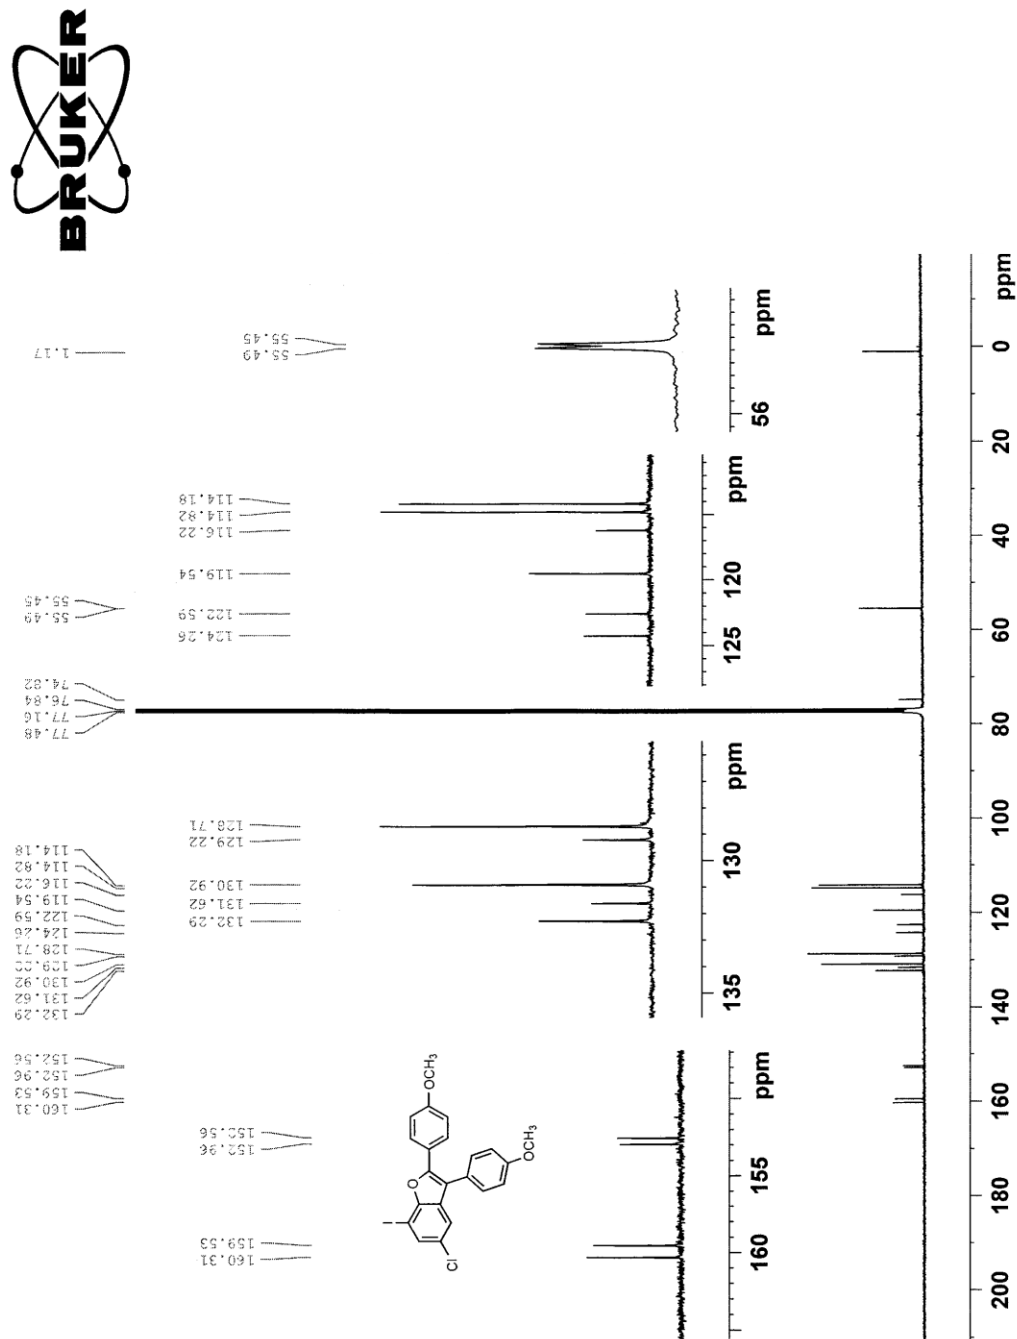

1.3.25  $^1\text{H-NMR}$  of 5-chloro-7-iodo-2,3-diphenylbenzofuran (7m) in  $d\text{-CDCl}_3$  at 25  $^\circ\text{C}$ 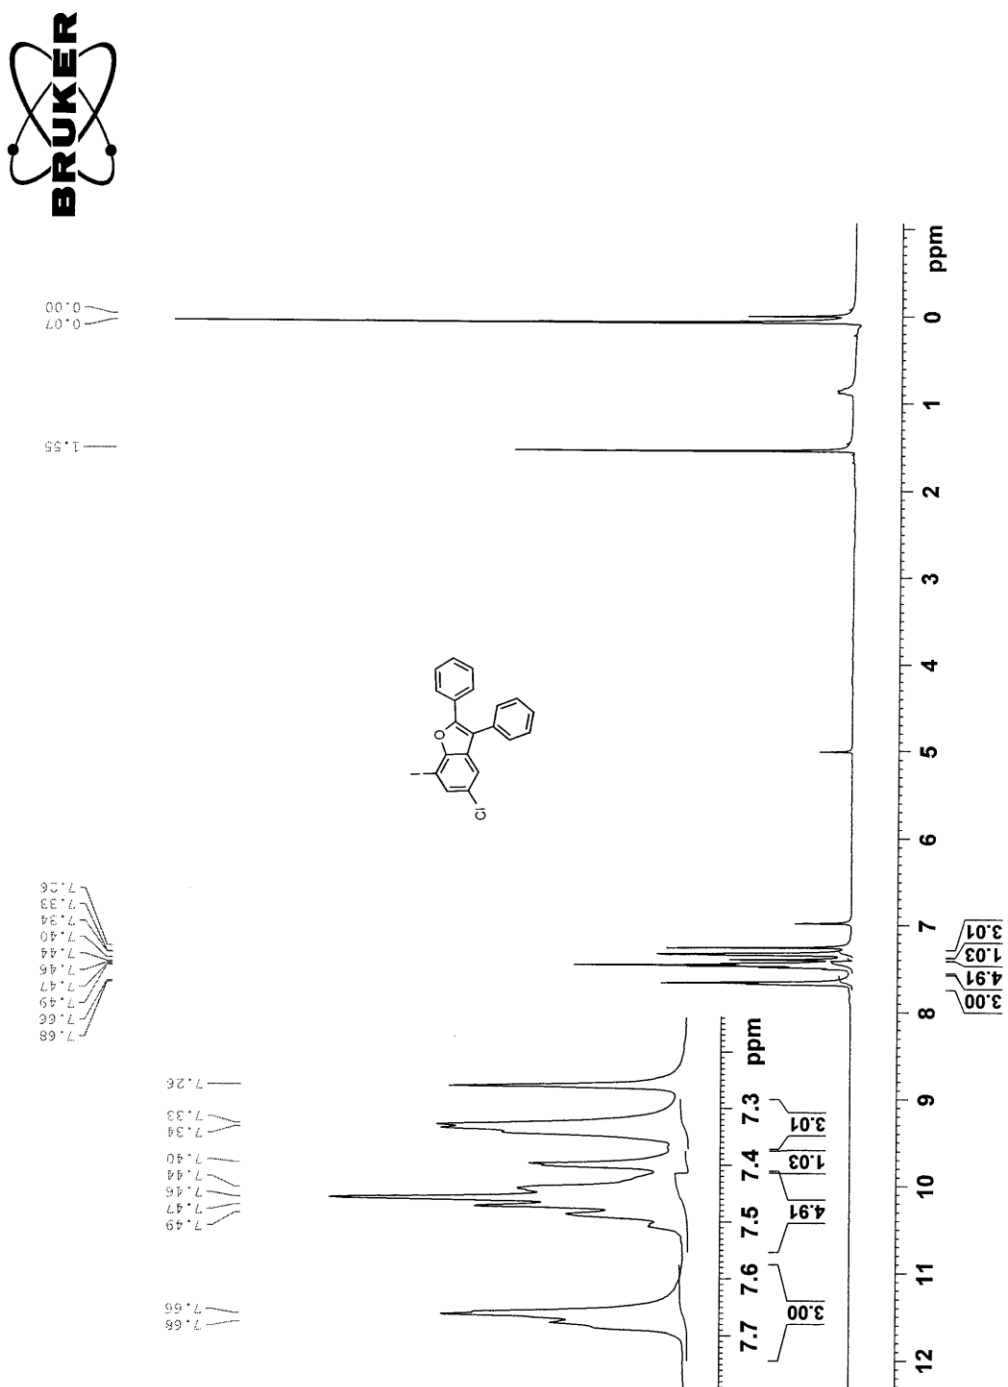









**1.3.29  $^1\text{H-NMR}$  of 5-bromo-7-iodo-2,3-bis(4-methoxyphenyl)benzofuran (7p) in  $d\text{-CDCl}_3$  at 25 °C**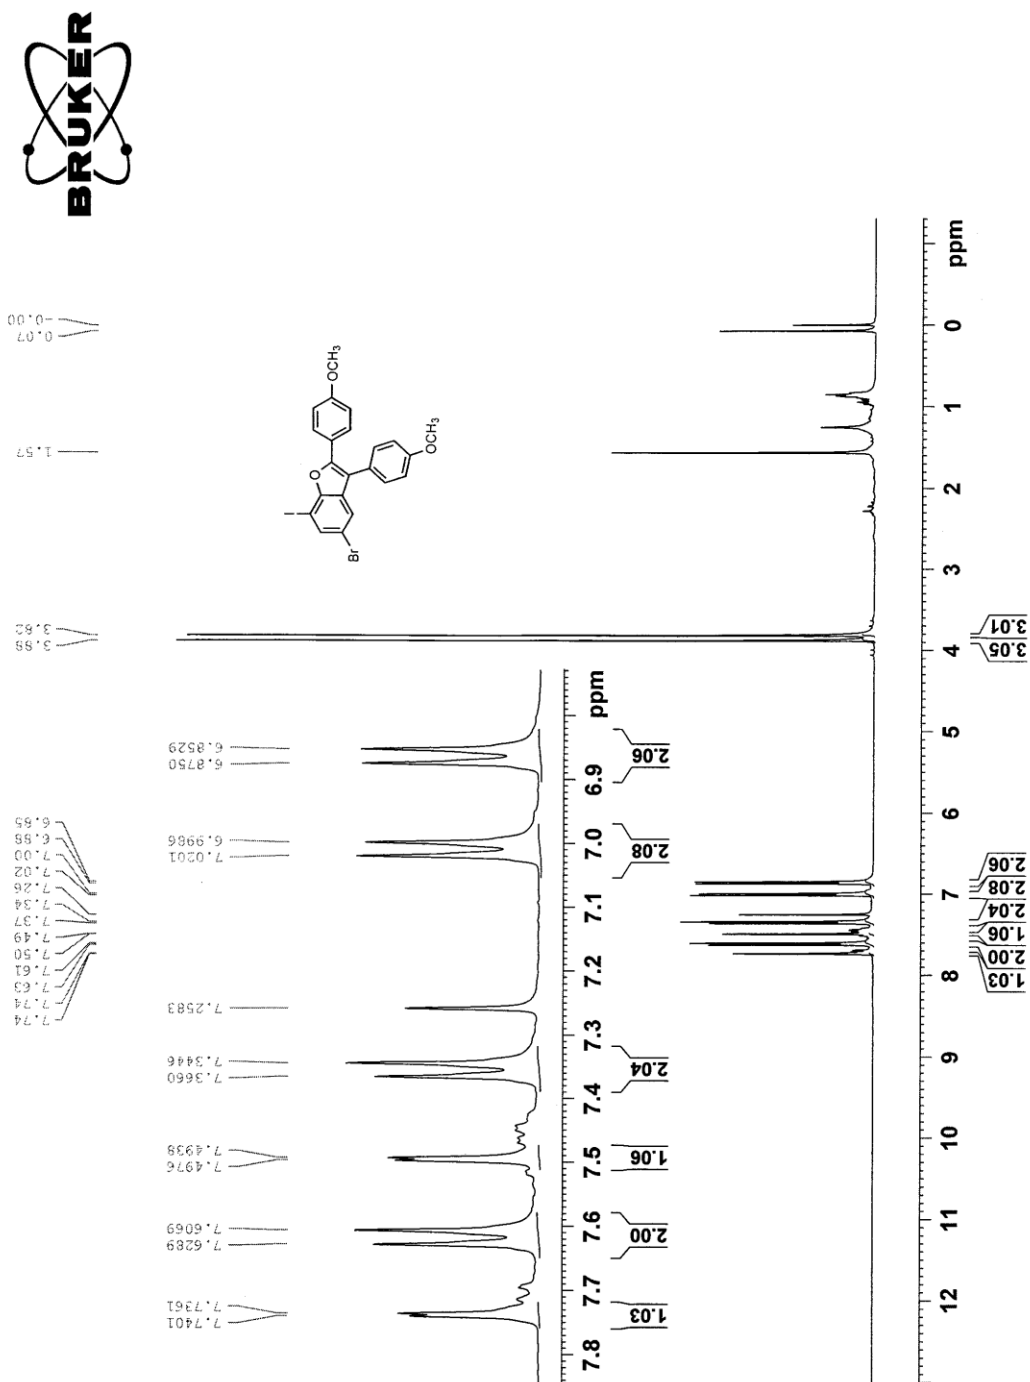

**1.3.30**  $^{13}\text{C}$ -NMR of 5-bromo-7-iodo-2,3-bis(4-methoxyphenyl)benzofuran (7p) in  $d\text{-CDCl}_3$  at 25 °C.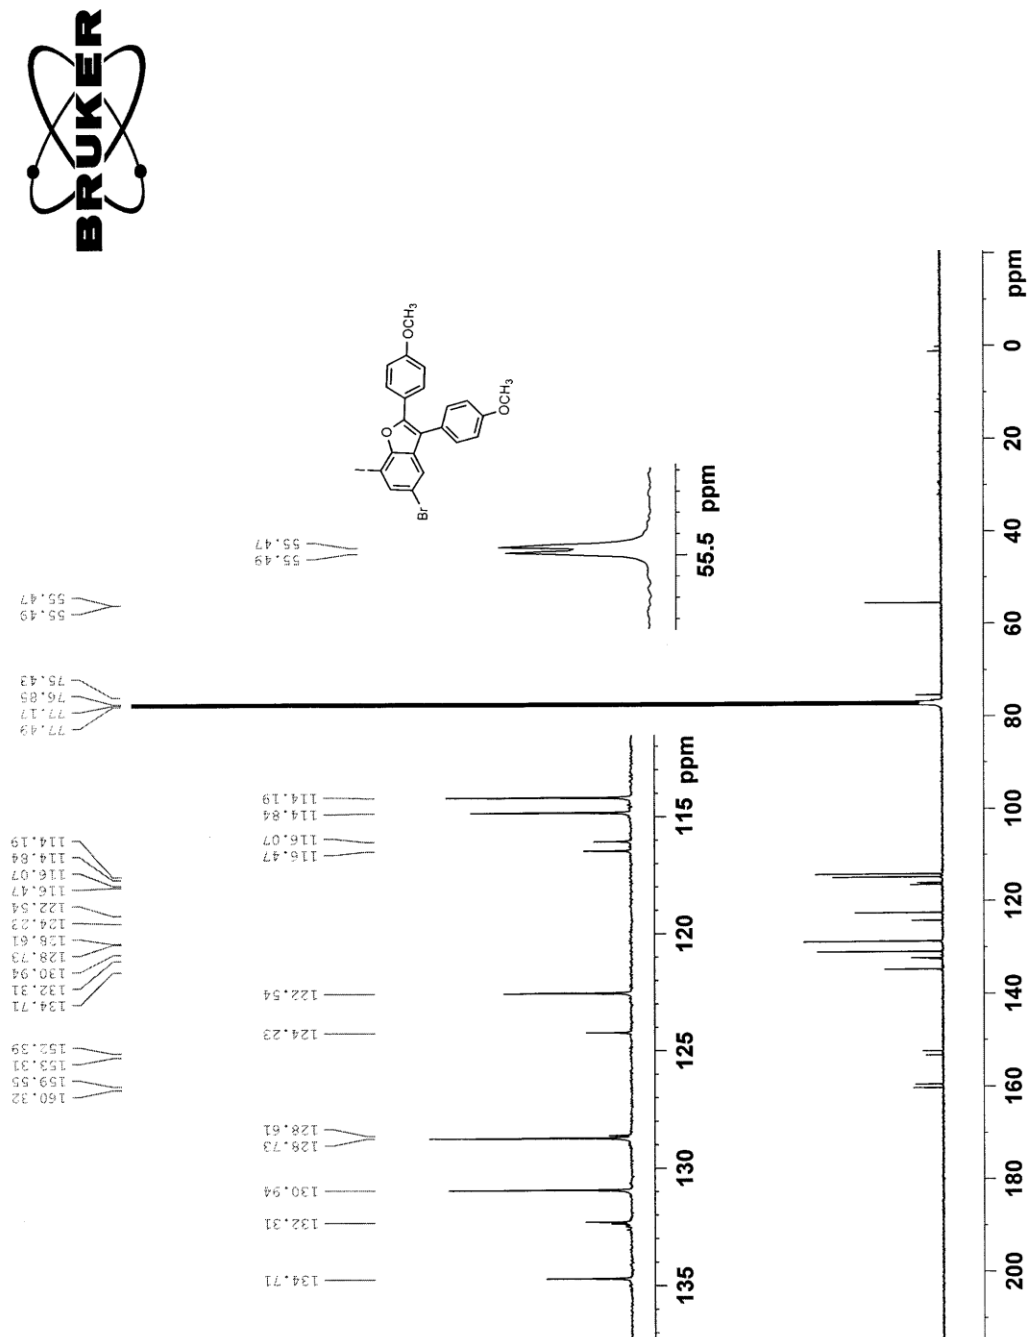





1.3.33 <sup>1</sup>H-NMR of 7-chloro-2,3-bis(4-methoxyphenyl)benzofuran (7r) in d-CDCl<sub>3</sub> at 25 °C

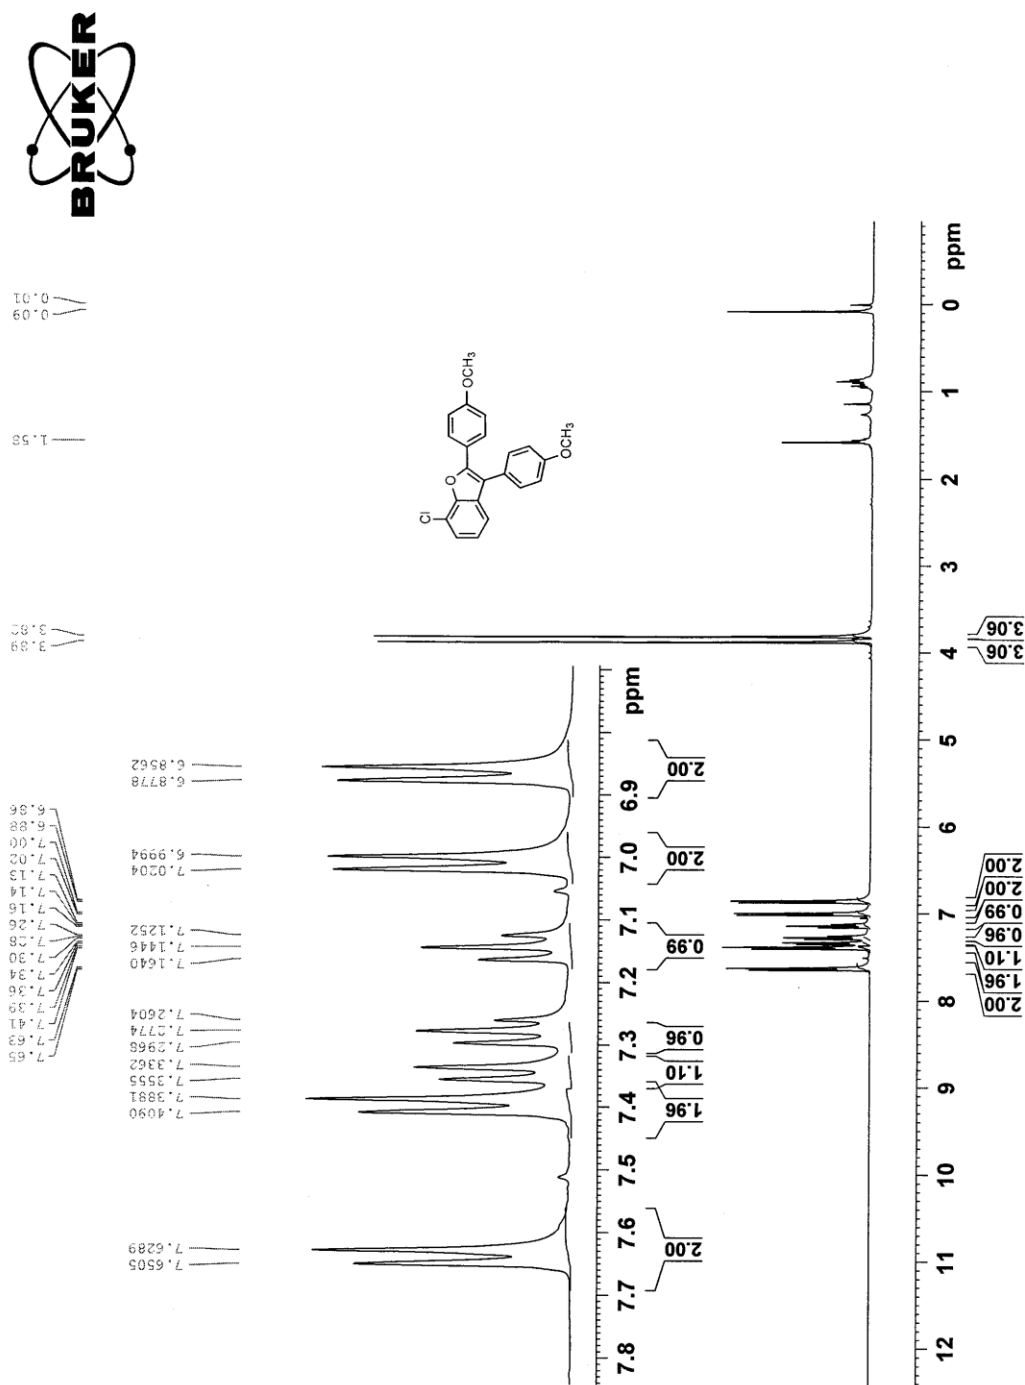





1.3.35 <sup>1</sup>H-NMR of 7-bromo-2,3-bis(4-methoxyphenyl)benzofuran (7t) in d-CDCl<sub>3</sub> at 25 °C

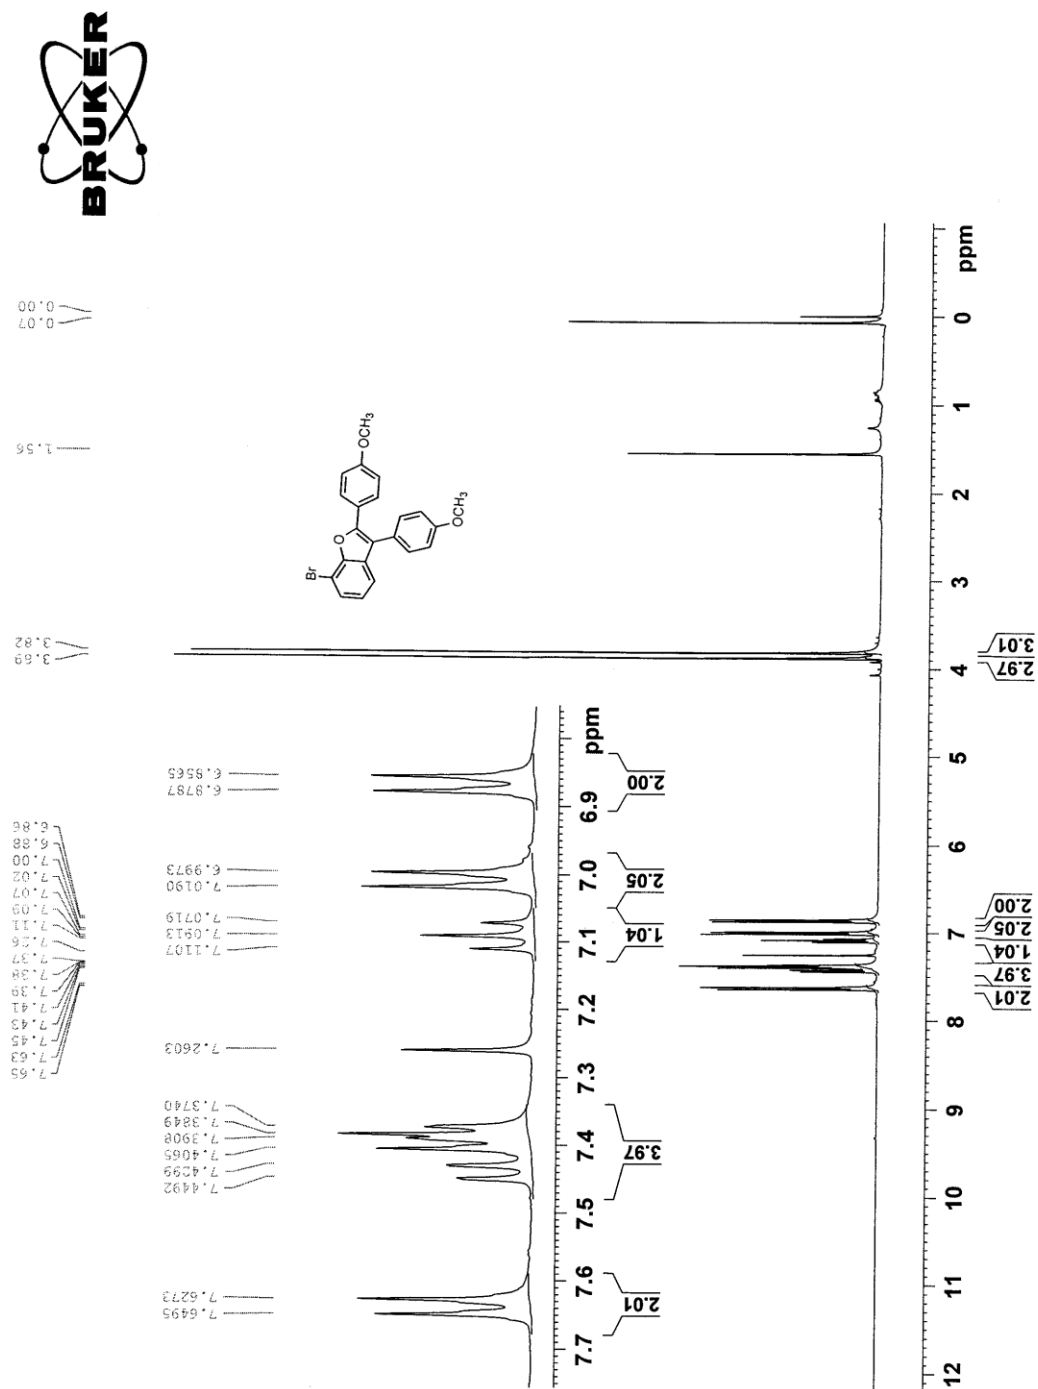

**1.3.36**  $^{13}\text{C}$ -NMR of 7-bromo-2,3-bis(4-methoxyphenyl)benzofuran (**7t**) in  $d\text{-CDCl}_3$  at 25 °C.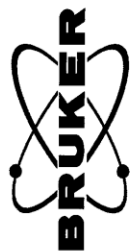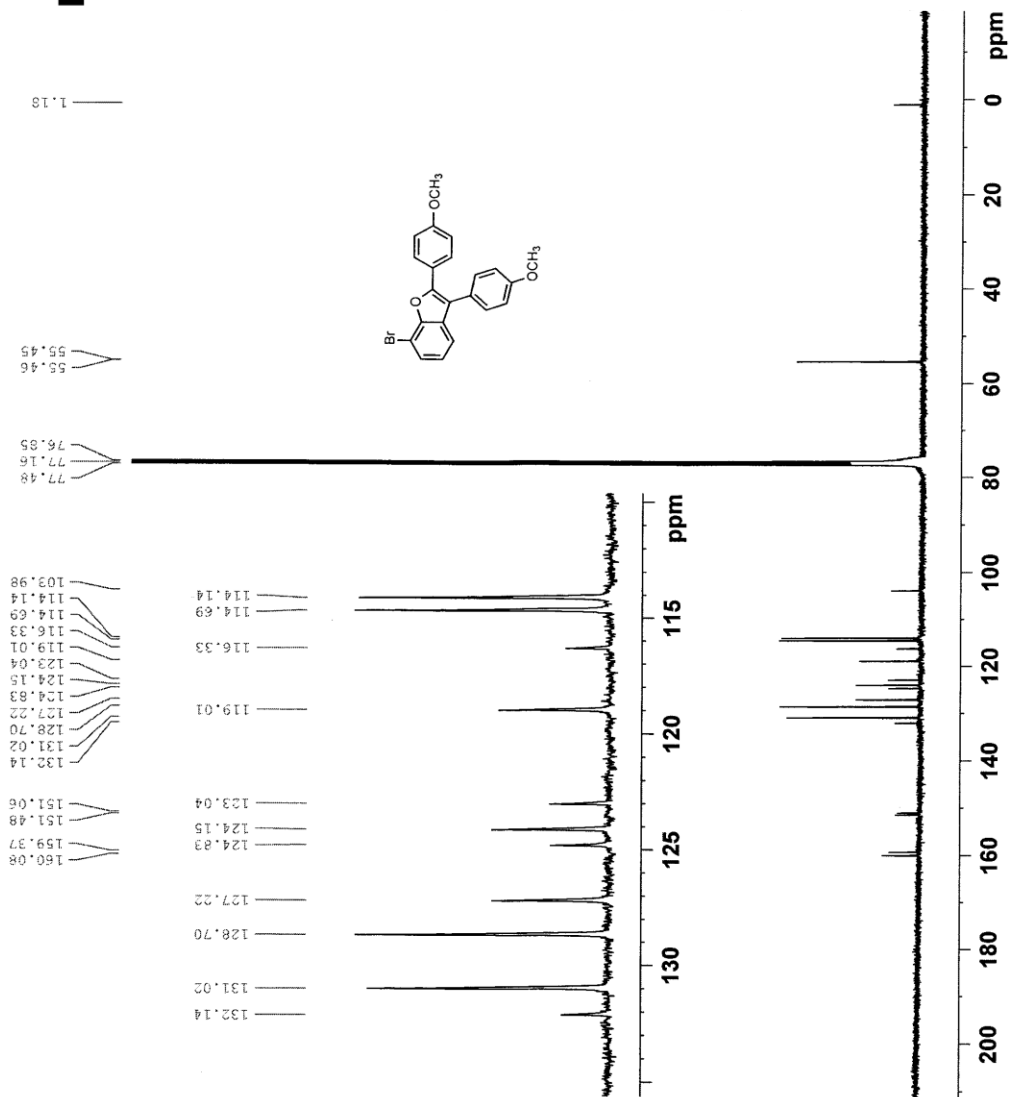

**1.3.37  $^1\text{H-NMR}$  of 1-(5-chloro-2,3-diiodophenyl)-1-(4-methoxyphenyl)propan-2-one in  $d\text{-CDCl}_3$  at 25 °C**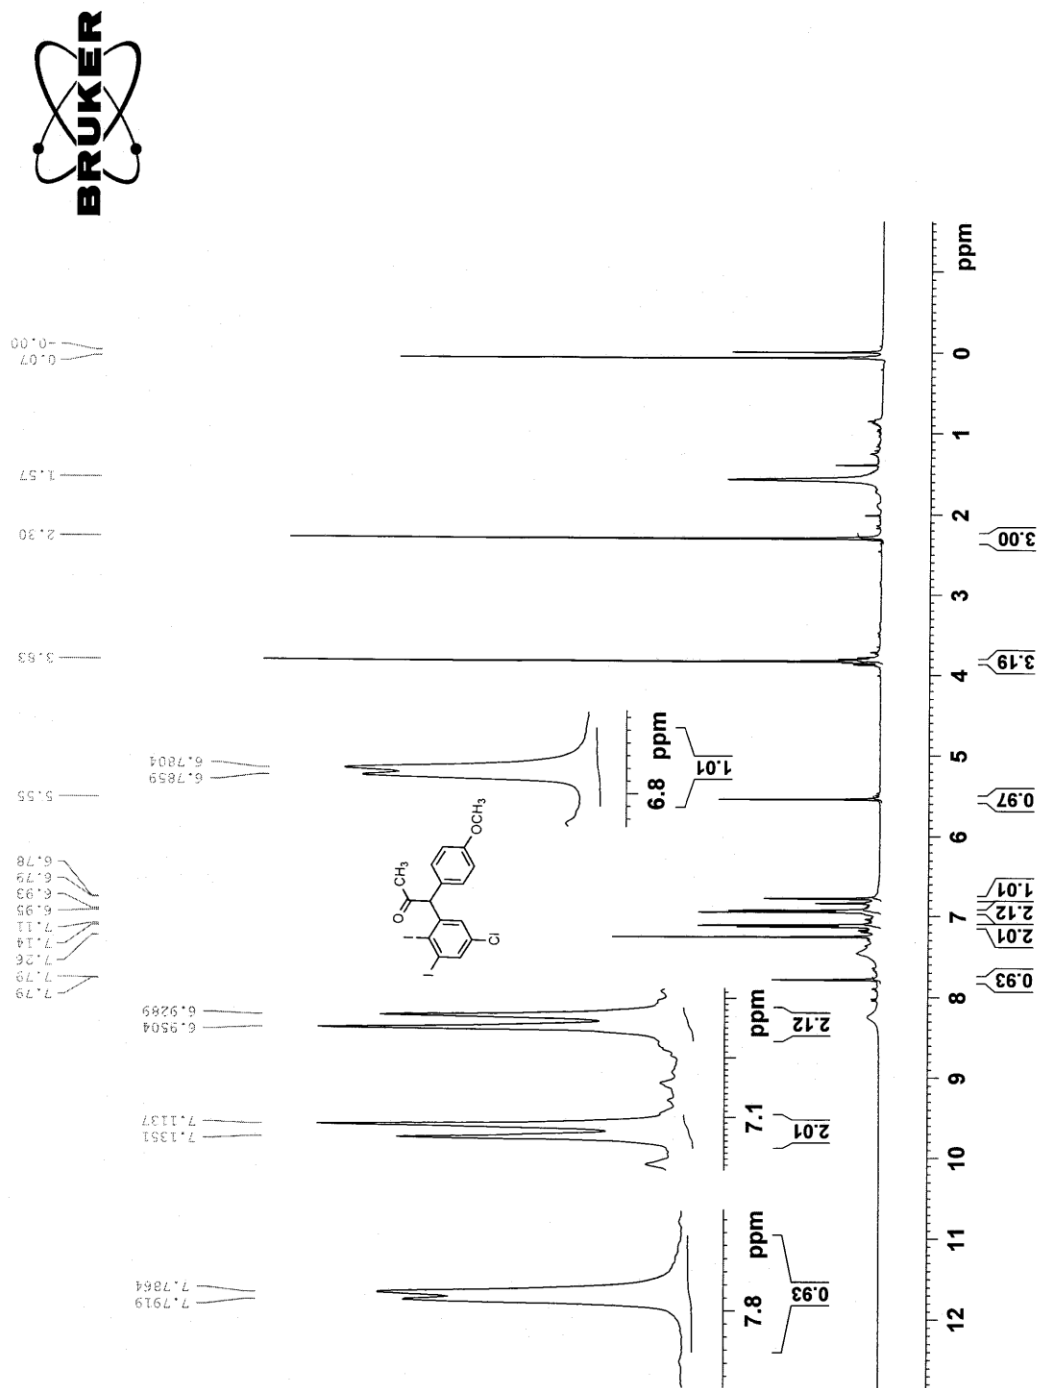

**1.3.38**  $^{13}\text{C}$ -NMR of 1-(5-chloro-2,3-diiodophenyl)-1-(4-methoxyphenyl)propan-2-one in  $d\text{-CDCl}_3$  at 25 °C.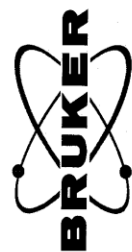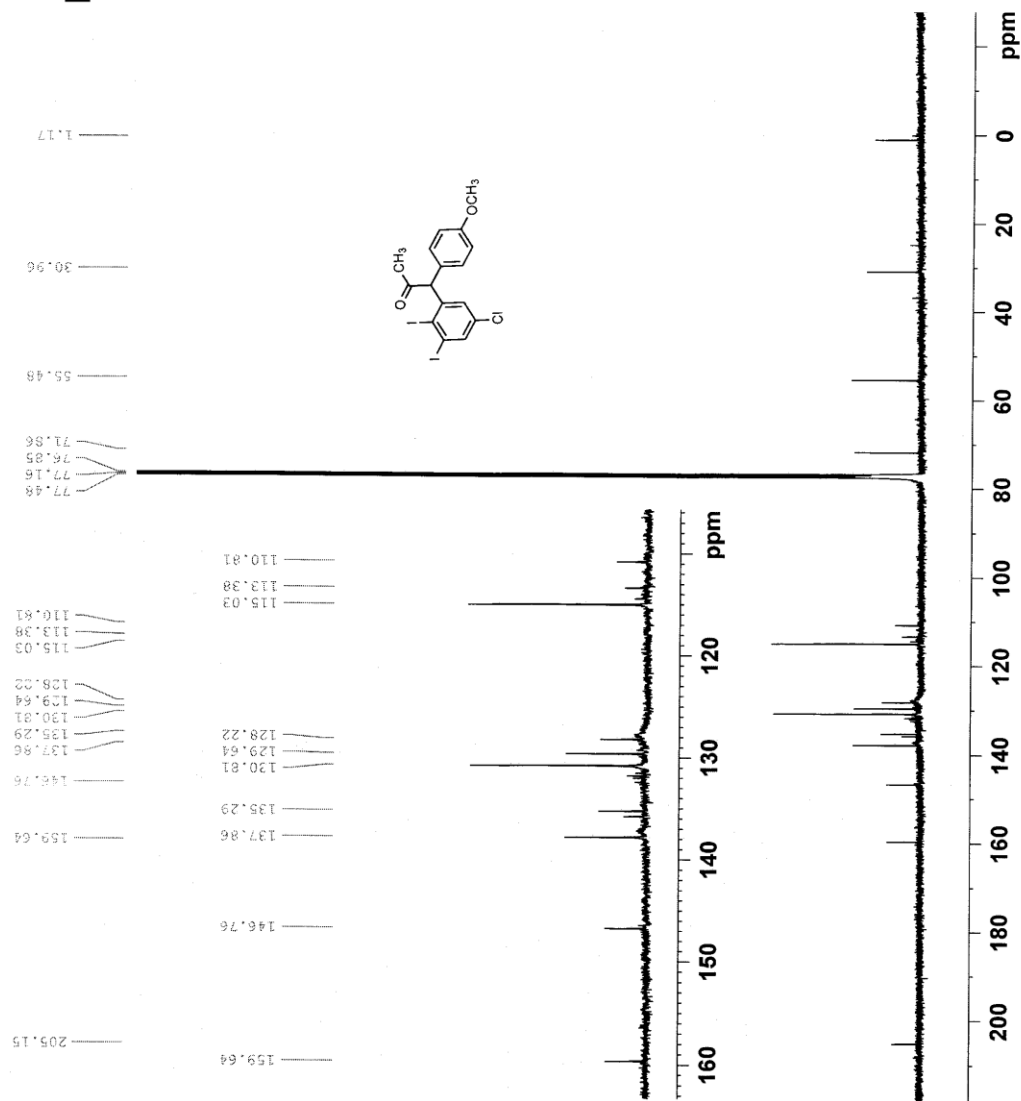

1.4.1 X-ray data of 2-(4-chlorophenyl)-7-iodo-3-phenyl-1-benzofuran (**7c**)

## STRUCTURE REPORT

**XCL Code:** JUS1802

**Date:** 19 September 2018

**Compound:** 2-(4-chlorophenyl)-7-iodo-3-phenyl-1-benzofuran

**Formula:** C<sub>20</sub>H<sub>12</sub>ClIO

**Supervisor:** R. Al-Zoubi, Jordan University of Science and Technology

**Crystallographer:** M. J. Ferguson

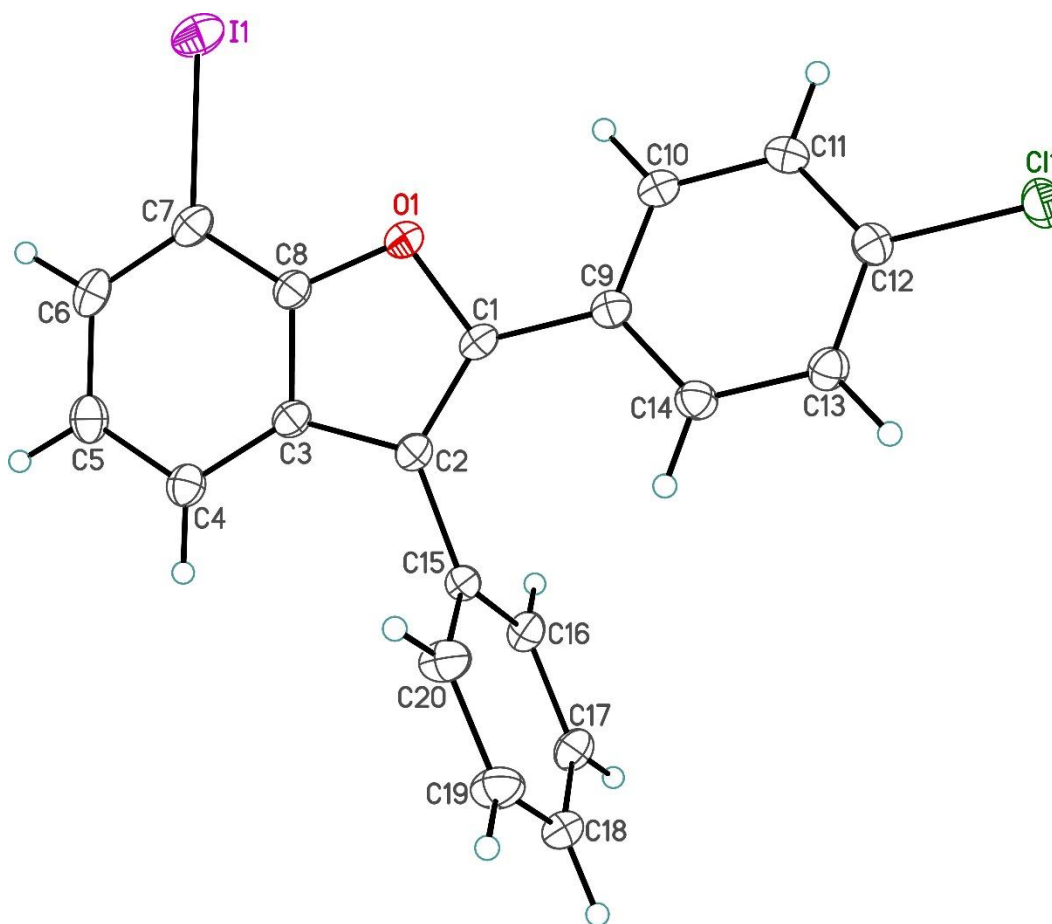

### Figure Legends

**Figure 1.** Perspective view of the 2-(4-chlorophenyl)-7-iodo-3-phenyl-1-benzofuran molecule showing the atom labelling scheme. Non-hydrogen atoms are represented by Gaussian ellipsoids at the 30% probability level. Hydrogen atoms are shown with arbitrarily small thermal parameters.

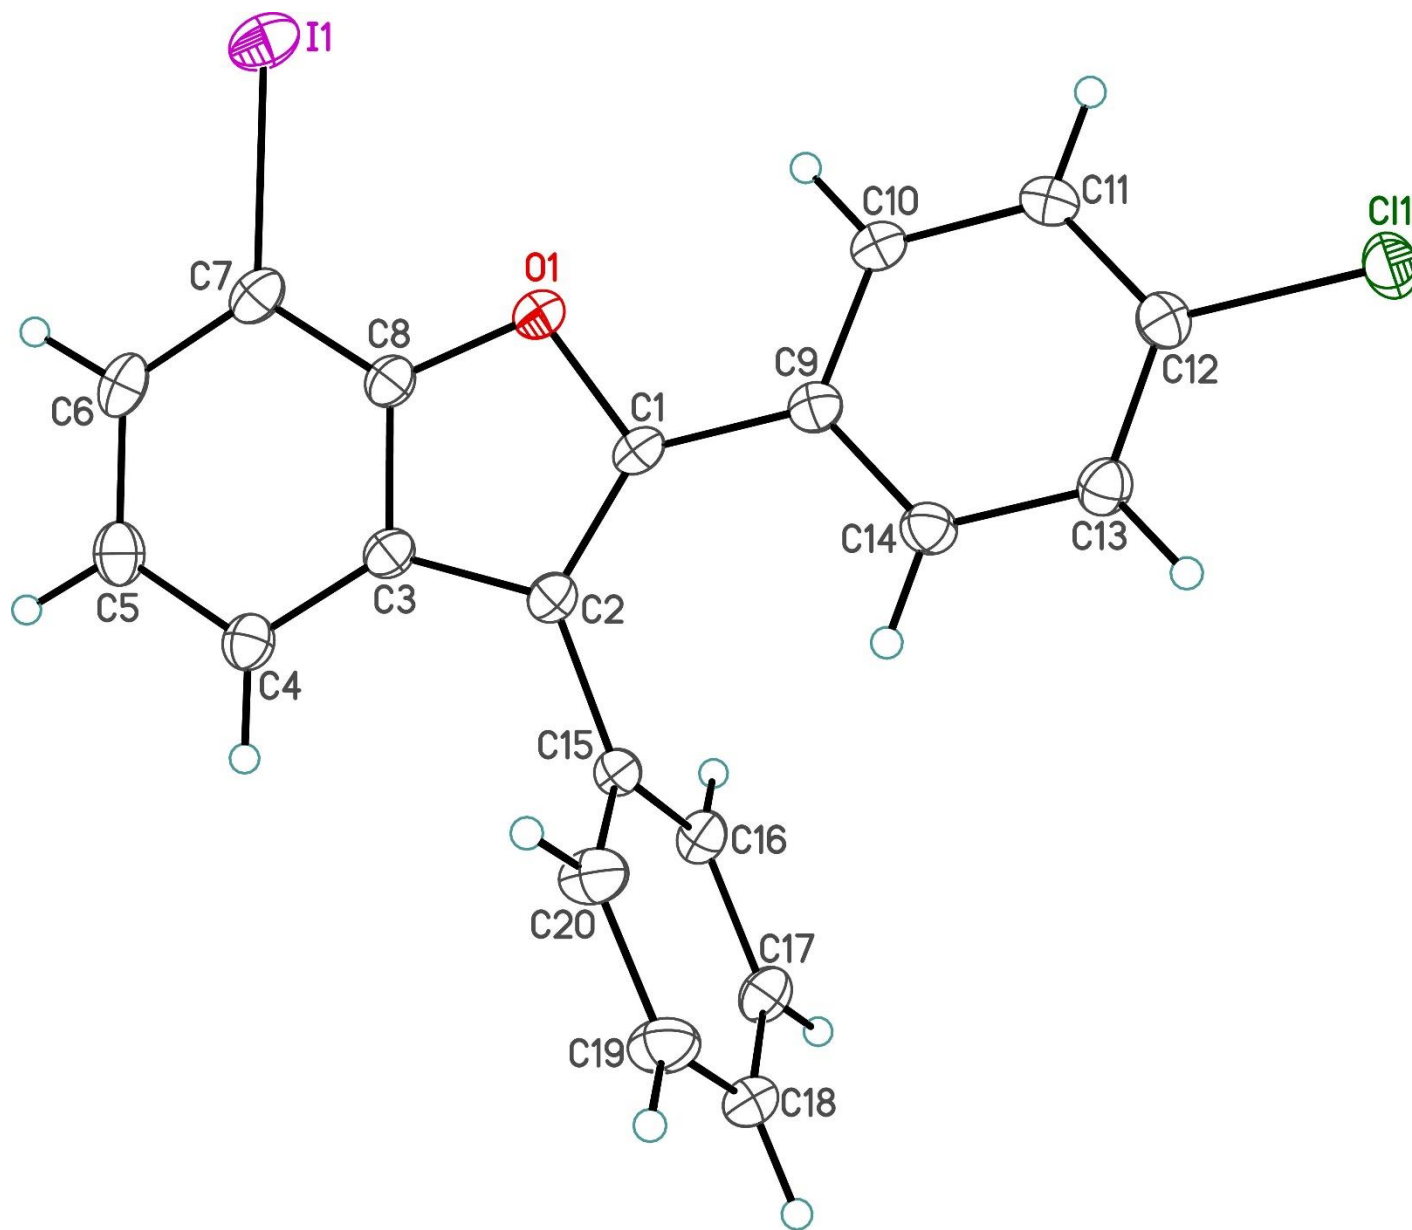

## List of Tables

- Table 1.** Crystallographic Experimental Details
- Table 2.** Atomic Coordinates and Equivalent Isotropic Displacement Parameters
- Table 3.** Selected Interatomic Distances
- Table 4.** Selected Interatomic Angles
- Table 5.** Torsional Angles
- Table 6.** Anisotropic Displacement Parameters
- Table 7.** Derived Atomic Coordinates and Displacement Parameters for Hydrogen Atoms



**Table 1.** Crystallographic Experimental Details**A. Crystal Data**

|                                             |                                      |
|---------------------------------------------|--------------------------------------|
| formula                                     | C <sub>20</sub> H <sub>12</sub> ClIO |
| formula weight                              | 430.65                               |
| crystal dimensions (mm)                     | 0.23 × 0.19 × 0.04                   |
| crystal system                              | triclinic                            |
| space group                                 | <i>P</i> $\bar{1}$ (No. 2)           |
| unit cell parameters <sup>a</sup>           |                                      |
| <i>a</i> (Å)                                | 9.244(2)                             |
| <i>b</i> (Å)                                | 9.988(3)                             |
| <i>c</i> (Å)                                | 10.515(3)                            |
| $\alpha$ (deg)                              | 86.607(3)                            |
| $\beta$ (deg)                               | 65.448(3)                            |
| $\gamma$ (deg)                              | 70.670(3)                            |
| <i>V</i> (Å <sup>3</sup> )                  | 829.8(4)                             |
| <i>Z</i>                                    | 2                                    |
| $\rho_{\text{calcd}}$ (g cm <sup>-3</sup> ) | 1.724                                |
| $\mu$ (mm <sup>-1</sup> )                   | 2.092                                |

**B. Data Collection and Refinement Conditions**

|                                                       |                                                                             |
|-------------------------------------------------------|-----------------------------------------------------------------------------|
| diffractometer                                        | Bruker PLATFORM/APEX II CCD <sup>b</sup>                                    |
| radiation ( $\lambda$ [Å])                            | graphite-monochromated Mo K $\alpha$ (0.71073)                              |
| temperature (°C)                                      | -80                                                                         |
| scan type                                             | $\omega$ scans (0.3°) (20 s exposures)                                      |
| data collection $2\theta$ limit (deg)                 | 55.27                                                                       |
| total data collected                                  | 7499 ( $-12 \leq h \leq 12$ , $-13 \leq k \leq 13$ , $-13 \leq l \leq 13$ ) |
| independent reflections                               | 3843 ( $R_{\text{int}} = 0.0149$ )                                          |
| number of observed reflections ( <i>NO</i> )          | 3365 [ $F_o^2 \geq 2\sigma(F_o^2)$ ]                                        |
| structure solution method                             | intrinsic phasing ( <i>SHELXT-2014</i> <sup>c</sup> )                       |
| refinement method                                     | full-matrix least-squares on $F^2$ ( <i>SHELXL-2016</i> <sup>d</sup> )      |
| absorption correction method                          | Gaussian integration (face-indexed)                                         |
| range of transmission factors                         | 0.9393–0.7307                                                               |
| data/restraints/parameters                            | 3843 / 0 / 208                                                              |
| goodness-of-fit ( <i>S</i> ) <sup>e</sup> [all data]  | 1.051                                                                       |
| final <i>R</i> indices <sup>f</sup>                   |                                                                             |
| <i>R</i> <sub>1</sub> [ $F_o^2 \geq 2\sigma(F_o^2)$ ] | 0.0265                                                                      |
| <i>wR</i> <sub>2</sub> [all data]                     | 0.0676                                                                      |
| largest difference peak and hole                      | 0.636 and -0.727 e Å <sup>-3</sup>                                          |

<sup>a</sup>Obtained from least-squares refinement of 6231 reflections with  $4.34^\circ < 2\theta < 55.24^\circ$ .

(continued)

**Table 1.** Crystallographic Experimental Details (continued)

<sup>b</sup>Programs for diffractometer operation, data collection, data reduction and absorption correction were those supplied by Bruker

<sup>c</sup>Sheldrick, G. M. *Acta Crystallogr.* **2015**, *A71*, 3–8. (*SHELXT-2014*)

<sup>d</sup>Sheldrick, G. M. *Acta Crystallogr.* **2015**, *C71*, 3–8. (*SHELXL-2016*)

<sup>e</sup> $S = [\Sigma w(F_o^2 - F_c^2)^2 / (n - p)]^{1/2}$  ( $n$  = number of data;  $p$  = number of parameters varied;  $w = [\sigma^2(F_o^2) + (0.0329P)^2 + 0.3747P]^{-1}$  where  $P = [\text{Max}(F_o^2, 0) + 2F_c^2]/3$ ).

<sup>f</sup> $R_1 = \Sigma ||F_o| - |F_c|| / \Sigma |F_o|$ ;  $wR_2 = [\Sigma w(F_o^2 - F_c^2)^2 / \Sigma w(F_o^4)]^{1/2}$ .

**Table 2.** Atomic Coordinates and Equivalent Isotropic Displacement Parameters

| Atom | <i>x</i>    | <i>y</i>    | <i>z</i>    | <i>U</i> <sub>eq</sub> , Å <sup>2</sup> |
|------|-------------|-------------|-------------|-----------------------------------------|
| I1   | 0.79344(2)  | -0.01350(2) | 0.34954(2)  | 0.04862(8)*                             |
| Cl1  | -0.27026(7) | 0.67509(6)  | 0.82007(6)  | 0.03918(14)*                            |
| O1   | 0.52940(19) | 0.31735(15) | 0.37816(16) | 0.0291(3)*                              |
| C1   | 0.4391(3)   | 0.4592(2)   | 0.3730(2)   | 0.0267(4)*                              |
| C2   | 0.5323(3)   | 0.5162(2)   | 0.2616(2)   | 0.0274(4)*                              |
| C3   | 0.6931(3)   | 0.4057(2)   | 0.1897(2)   | 0.0275(4)*                              |
| C4   | 0.8424(3)   | 0.3965(3)   | 0.0697(2)   | 0.0330(5)*                              |
| C5   | 0.9737(3)   | 0.2671(3)   | 0.0317(3)   | 0.0368(5)*                              |
| C6   | 0.9607(3)   | 0.1487(3)   | 0.1081(3)   | 0.0360(5)*                              |
| C7   | 0.8149(3)   | 0.1571(2)   | 0.2265(2)   | 0.0326(5)*                              |
| C8   | 0.6826(3)   | 0.2866(2)   | 0.2648(2)   | 0.0283(4)*                              |
| C9   | 0.2664(3)   | 0.5130(2)   | 0.4836(2)   | 0.0271(4)*                              |
| C10  | 0.1913(3)   | 0.4185(2)   | 0.5657(2)   | 0.0300(4)*                              |
| C11  | 0.0271(3)   | 0.4674(2)   | 0.6693(2)   | 0.0324(5)*                              |
| C12  | -0.0633(3)  | 0.6122(2)   | 0.6910(2)   | 0.0301(4)*                              |
| C13  | 0.0079(3)   | 0.7085(2)   | 0.6113(2)   | 0.0311(5)*                              |
| C14  | 0.1720(3)   | 0.6590(2)   | 0.5086(2)   | 0.0304(5)*                              |
| C15  | 0.4773(3)   | 0.6594(2)   | 0.2136(2)   | 0.0267(4)*                              |
| C16  | 0.3862(3)   | 0.6816(2)   | 0.1326(2)   | 0.0311(5)*                              |
| C17  | 0.3306(3)   | 0.8156(2)   | 0.0891(3)   | 0.0350(5)*                              |
| C18  | 0.3652(3)   | 0.9283(2)   | 0.1257(3)   | 0.0372(5)*                              |
| C19  | 0.4568(4)   | 0.9065(3)   | 0.2050(3)   | 0.0427(6)*                              |
| C20  | 0.5144(3)   | 0.7729(3)   | 0.2481(3)   | 0.0386(5)*                              |

Anisotropically-refined atoms are marked with an asterisk (\*). The form of the anisotropic displacement parameter is:  $\exp[-2\pi^2(h^2a^{*2}U_{11} + k^2b^{*2}U_{22} + l^2c^{*2}U_{33} + 2klb^{*c^{*}}U_{23} + 2hla^{*c^{*}}U_{13} + 2hka^{*b^{*}}U_{12})]$ .

**Table 3.** Selected Interatomic Distances (Å)

| Atom1 | Atom2 | Distance | Atom1 | Atom2 | Distance |
|-------|-------|----------|-------|-------|----------|
| I1    | C7    | 2.090(2) | C7    | C8    | 1.391(3) |
| C11   | C12   | 1.744(2) | C9    | C10   | 1.399(3) |
| O1    | C1    | 1.397(2) | C9    | C14   | 1.403(3) |
| O1    | C8    | 1.369(3) | C10   | C11   | 1.389(3) |
| C1    | C2    | 1.359(3) | C11   | C12   | 1.387(3) |
| C1    | C9    | 1.467(3) | C12   | C13   | 1.388(3) |
| C2    | C3    | 1.442(3) | C13   | C14   | 1.384(3) |
| C2    | C15   | 1.485(3) | C15   | C16   | 1.390(3) |
| C3    | C4    | 1.409(3) | C15   | C20   | 1.394(3) |
| C3    | C8    | 1.397(3) | C16   | C17   | 1.390(3) |
| C4    | C5    | 1.387(3) | C17   | C18   | 1.382(3) |
| C5    | C6    | 1.400(4) | C18   | C19   | 1.379(4) |
| C6    | C7    | 1.384(3) | C19   | C20   | 1.389(4) |

**Table 4.** Selected Interatomic Angles (deg)

| Atom1 | Atom2 | Atom3 | Angle      | Atom1 | Atom2 | Atom3 | Angle      |
|-------|-------|-------|------------|-------|-------|-------|------------|
| C1    | O1    | C8    | 105.83(16) | C1    | C9    | C10   | 120.22(19) |
| O1    | C1    | C2    | 111.13(18) | C1    | C9    | C14   | 121.30(19) |
| O1    | C1    | C9    | 114.90(18) | C10   | C9    | C14   | 118.5(2)   |
| C2    | C1    | C9    | 133.95(19) | C9    | C10   | C11   | 121.0(2)   |
| C1    | C2    | C3    | 106.62(18) | C10   | C11   | C12   | 119.2(2)   |
| C1    | C2    | C15   | 127.57(19) | C11   | C12   | C11   | 119.73(17) |
| C3    | C2    | C15   | 125.60(19) | C11   | C12   | C13   | 119.20(17) |
| C2    | C3    | C4    | 134.8(2)   | C11   | C12   | C13   | 121.1(2)   |
| C2    | C3    | C8    | 105.60(19) | C12   | C13   | C14   | 119.4(2)   |
| C4    | C3    | C8    | 119.6(2)   | C9    | C14   | C13   | 120.9(2)   |
| C3    | C4    | C5    | 117.6(2)   | C2    | C15   | C16   | 119.56(19) |
| C4    | C5    | C6    | 122.0(2)   | C2    | C15   | C20   | 121.5(2)   |
| C5    | C6    | C7    | 120.8(2)   | C16   | C15   | C20   | 118.9(2)   |
| I1    | C7    | C6    | 122.23(17) | C15   | C16   | C17   | 120.4(2)   |
| I1    | C7    | C8    | 120.32(17) | C16   | C17   | C18   | 120.5(2)   |
| C6    | C7    | C8    | 117.4(2)   | C17   | C18   | C19   | 119.4(2)   |
| O1    | C8    | C3    | 110.80(18) | C18   | C19   | C20   | 120.7(2)   |
| O1    | C8    | C7    | 126.6(2)   | C15   | C20   | C19   | 120.1(2)   |
| C3    | C8    | C7    | 122.6(2)   |       |       |       |            |

**Table 5.** Torsional Angles (deg)

| Atom1 | Atom2 | Atom3 | Atom4 | Angle       | Atom1 | Atom2 | Atom3 | Atom4 | Angle       |
|-------|-------|-------|-------|-------------|-------|-------|-------|-------|-------------|
| C8    | O1    | C1    | C2    | -0.6(2)     | C3    | C4    | C5    | C6    | 0.2(3)      |
| C8    | O1    | C1    | C9    | 177.81(17)  | C4    | C5    | C6    | C7    | -0.6(3)     |
| C1    | O1    | C8    | C3    | 1.2(2)      | C5    | C6    | C7    | II    | -177.03(17) |
| C1    | O1    | C8    | C7    | -179.9(2)   | C5    | C6    | C7    | C8    | 0.7(3)      |
| O1    | C1    | C2    | C3    | -0.1(2)     | II    | C7    | C8    | O1    | -1.6(3)     |
| O1    | C1    | C2    | C15   | 174.78(19)  | II    | C7    | C8    | C3    | 177.24(15)  |
| C9    | C1    | C2    | C3    | -178.2(2)   | C6    | C7    | C8    | O1    | -179.41(19) |
| C9    | C1    | C2    | C15   | -3.3(4)     | C6    | C7    | C8    | C3    | -0.6(3)     |
| O1    | C1    | C9    | C10   | -13.2(3)    | C1    | C9    | C10   | C11   | -178.9(2)   |
| O1    | C1    | C9    | C14   | 167.77(18)  | C14   | C9    | C10   | C11   | 0.2(3)      |
| C2    | C1    | C9    | C10   | 164.8(2)    | C1    | C9    | C14   | C13   | 178.7(2)    |
| C2    | C1    | C9    | C14   | -14.2(4)    | C10   | C9    | C14   | C13   | -0.4(3)     |
| C1    | C2    | C3    | C4    | -179.8(2)   | C9    | C10   | C11   | C12   | 0.1(3)      |
| C1    | C2    | C3    | C8    | 0.8(2)      | C10   | C11   | C12   | CI1   | 179.61(17)  |
| C15   | C2    | C3    | C4    | 5.2(4)      | C10   | C11   | C12   | C13   | -0.1(3)     |
| C15   | C2    | C3    | C8    | -174.21(19) | CI1   | C12   | C13   | C14   | -179.83(17) |
| C1    | C2    | C15   | C16   | -81.0(3)    | C11   | C12   | C13   | C14   | -0.1(3)     |
| C1    | C2    | C15   | C20   | 98.9(3)     | C12   | C13   | C14   | C9    | 0.3(3)      |
| C3    | C2    | C15   | C16   | 93.0(3)     | C2    | C15   | C16   | C17   | 178.7(2)    |
| C3    | C2    | C15   | C20   | -87.1(3)    | C20   | C15   | C16   | C17   | -1.2(3)     |
| C2    | C3    | C4    | C5    | -179.4(2)   | C2    | C15   | C20   | C19   | -178.1(2)   |
| C8    | C3    | C4    | C5    | 0.0(3)      | C16   | C15   | C20   | C19   | 1.7(4)      |
| C2    | C3    | C8    | O1    | -1.2(2)     | C15   | C16   | C17   | C18   | 0.1(4)      |
| C2    | C3    | C8    | C7    | 179.8(2)    | C16   | C17   | C18   | C19   | 0.5(4)      |
| C4    | C3    | C8    | O1    | 179.21(18)  | C17   | C18   | C19   | C20   | 0.1(4)      |
| C4    | C3    | C8    | C7    | 0.2(3)      | C18   | C19   | C20   | C15   | -1.2(4)     |

**Table 6.** Anisotropic Displacement Parameters ( $U_{ij}$ , Å<sup>2</sup>)

| Atom | $U_{11}$    | $U_{22}$    | $U_{33}$    | $U_{23}$    | $U_{13}$     | $U_{12}$    |
|------|-------------|-------------|-------------|-------------|--------------|-------------|
| II   | 0.05814(13) | 0.02749(10) | 0.05816(13) | 0.00755(7)  | -0.02792(10) | -0.00803(8) |
| Cl1  | 0.0314(3)   | 0.0386(3)   | 0.0386(3)   | -0.0007(2)  | -0.0057(2)   | -0.0119(2)  |
| O1   | 0.0299(8)   | 0.0243(7)   | 0.0321(8)   | 0.0041(6)   | -0.0141(6)   | -0.0067(6)  |
| C1   | 0.0292(11)  | 0.0202(9)   | 0.0319(11)  | 0.0030(8)   | -0.0165(9)   | -0.0050(8)  |
| C2   | 0.0271(10)  | 0.0272(10)  | 0.0290(11)  | 0.0035(8)   | -0.0140(9)   | -0.0075(8)  |
| C3   | 0.0299(11)  | 0.0265(10)  | 0.0280(11)  | 0.0021(8)   | -0.0152(9)   | -0.0079(8)  |
| C4   | 0.0318(11)  | 0.0357(12)  | 0.0326(12)  | 0.0015(9)   | -0.0158(10)  | -0.0094(9)  |
| C5   | 0.0303(12)  | 0.0405(13)  | 0.0348(13)  | -0.0063(10) | -0.0108(10)  | -0.0081(10) |
| C6   | 0.0310(12)  | 0.0319(12)  | 0.0417(13)  | -0.0071(10) | -0.0189(10)  | -0.0001(9)  |
| C7   | 0.0363(12)  | 0.0259(10)  | 0.0388(13)  | -0.0004(9)  | -0.0219(10)  | -0.0057(9)  |
| C8   | 0.0292(11)  | 0.0276(10)  | 0.0291(11)  | 0.0009(8)   | -0.0146(9)   | -0.0074(9)  |
| C9   | 0.0303(11)  | 0.0274(10)  | 0.0277(11)  | 0.0032(8)   | -0.0155(9)   | -0.0104(9)  |
| C10  | 0.0332(11)  | 0.0249(10)  | 0.0328(12)  | 0.0050(8)   | -0.0160(10)  | -0.0085(9)  |
| C11  | 0.0363(12)  | 0.0317(11)  | 0.0312(12)  | 0.0086(9)   | -0.0135(10)  | -0.0157(10) |
| C12  | 0.0301(11)  | 0.0332(11)  | 0.0274(11)  | 0.0010(9)   | -0.0115(9)   | -0.0115(9)  |
| C13  | 0.0313(11)  | 0.0266(10)  | 0.0334(12)  | -0.0006(9)  | -0.0129(9)   | -0.0077(9)  |
| C14  | 0.0329(11)  | 0.0274(10)  | 0.0309(11)  | 0.0037(9)   | -0.0117(9)   | -0.0125(9)  |
| C15  | 0.0245(10)  | 0.0260(10)  | 0.0255(10)  | 0.0042(8)   | -0.0083(8)   | -0.0067(8)  |
| C16  | 0.0294(11)  | 0.0276(11)  | 0.0359(12)  | 0.0002(9)   | -0.0155(10)  | -0.0065(9)  |
| C17  | 0.0326(12)  | 0.0352(12)  | 0.0391(13)  | 0.0057(10)  | -0.0206(10)  | -0.0067(10) |
| C18  | 0.0336(12)  | 0.0265(11)  | 0.0471(14)  | 0.0082(10)  | -0.0157(11)  | -0.0072(9)  |
| C19  | 0.0521(15)  | 0.0318(12)  | 0.0565(16)  | 0.0108(11)  | -0.0303(13)  | -0.0205(11) |
| C20  | 0.0480(14)  | 0.0354(12)  | 0.0490(15)  | 0.0121(11)  | -0.0324(12)  | -0.0199(11) |

The form of the anisotropic displacement parameter is:

$$\exp[-2\pi^2(h^2a^*{}^2U_{11} + k^2b^*{}^2U_{22} + l^2c^*{}^2U_{33} + 2klb^*c^*U_{23} + 2hla^*c^*U_{13} + 2hka^*b^*U_{12})]$$

**Table 7.** Derived Atomic Coordinates and Displacement Parameters for Hydrogen Atoms

| Atom | <i>x</i>  | <i>y</i> | <i>z</i>  | $U_{eq}, \text{\AA}^2$ |
|------|-----------|----------|-----------|------------------------|
| H4   | 0.852628  | 0.476011 | 0.016856  | 0.040                  |
| H5   | 1.075609  | 0.258576 | -0.048673 | 0.044                  |
| H6   | 1.053036  | 0.061524 | 0.078350  | 0.043                  |
| H10  | 0.253679  | 0.319351 | 0.550268  | 0.036                  |
| H11  | -0.022786 | 0.402387 | 0.724557  | 0.039                  |
| H13  | -0.055278 | 0.807474 | 0.627120  | 0.037                  |
| H14  | 0.221265  | 0.724729 | 0.454201  | 0.036                  |
| H16  | 0.361866  | 0.604755 | 0.106810  | 0.037                  |
| H17  | 0.268378  | 0.829803 | 0.033845  | 0.042                  |
| H18  | 0.326260  | 1.019935 | 0.096522  | 0.045                  |
| H19  | 0.480702  | 0.983730 | 0.230433  | 0.051                  |
| H20  | 0.579176  | 0.758781 | 0.301169  | 0.046                  |



1.4.2 X-ray data of 2-(4-Chlorophenyl)-7-iodo-5-methyl-3-phenyl-1-benzofuran (**7g**)

### STRUCTURE REPORT

**XCL Code:** JUS1705

**Date:** 21 June 2017

**Compound:** 2-(4-Chlorophenyl)-7-iodo-5-methyl-3-phenyl-1-benzofuran

**Formula:** C<sub>21</sub>H<sub>14</sub>ClI

**Supervisor:** R. M. Al-Zoubi, Jordan University of Science and Technology

**Crystallographer:** R. McDonald

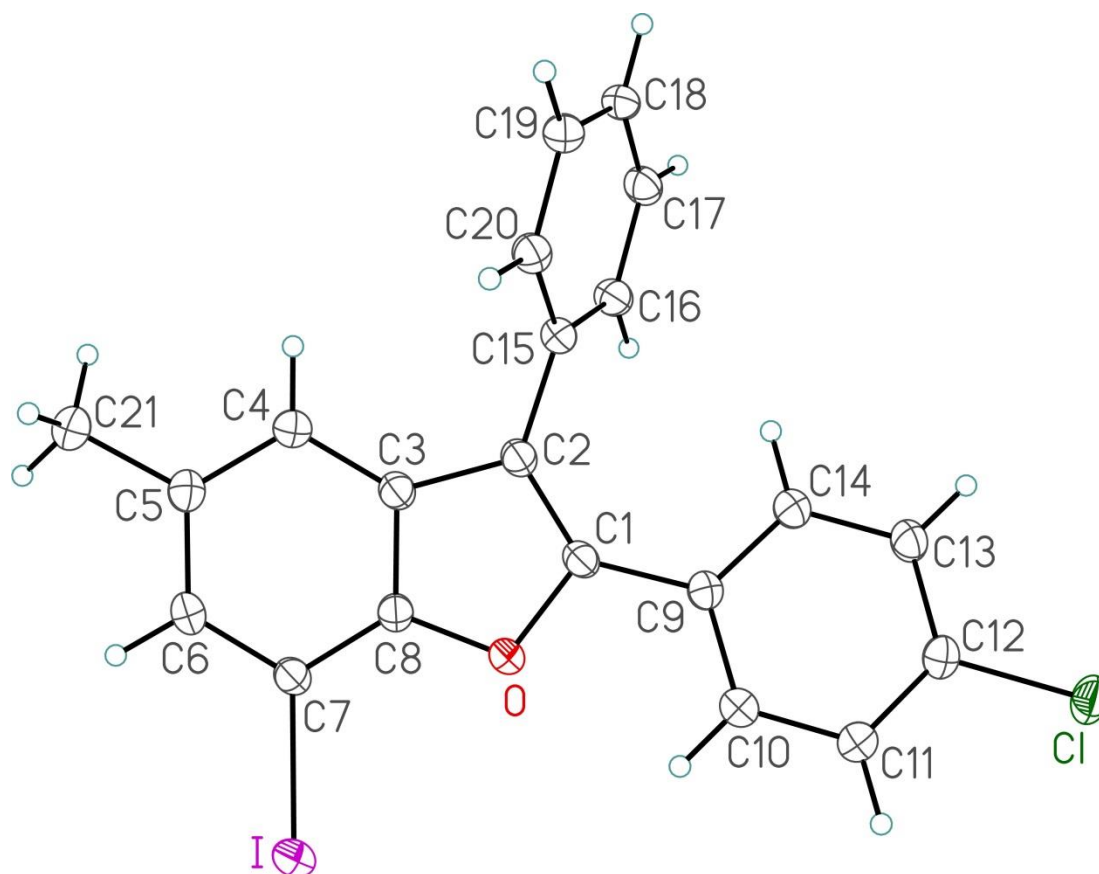

### Figure Legends

- Figure 1.** Perspective view of the 2-(4-chlorophenyl)-7-iodo-5-methyl-3-phenyl-1-benzofuran molecule showing the atom labelling scheme. Non-hydrogen atoms are represented by Gaussian ellipsoids at the 30% probability level. Hydrogen atoms are shown with arbitrarily small thermal parameters.
- Figure 2.** Alternate view of the molecule.

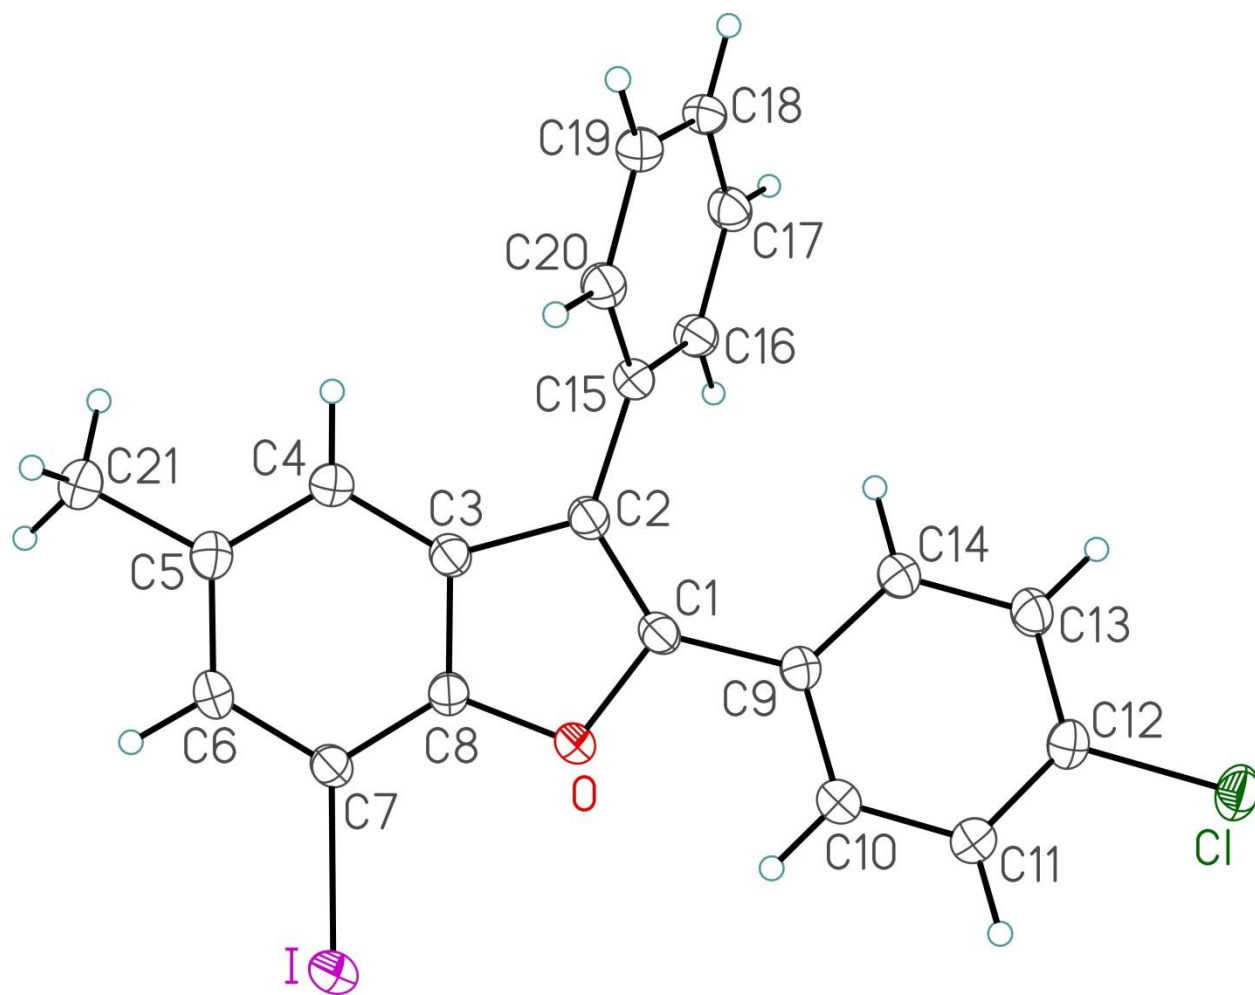

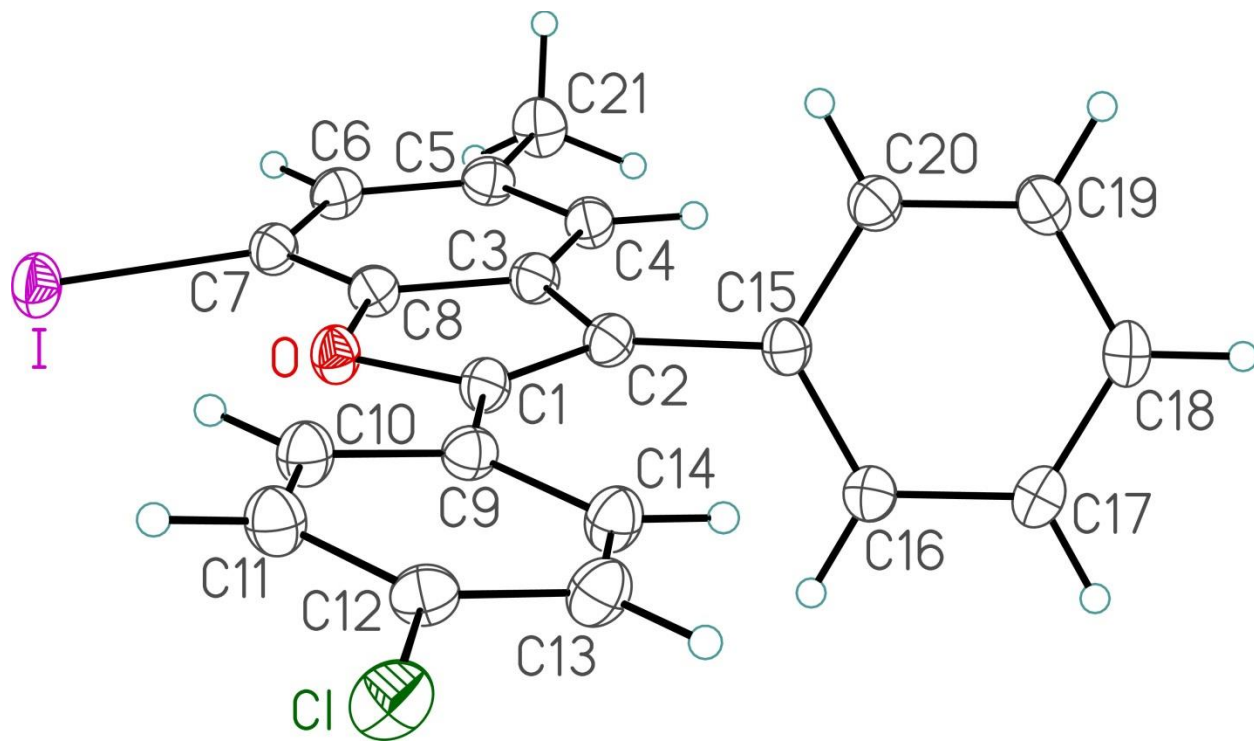

## List of Tables

- Table 1.** Crystallographic Experimental Details
- Table 2.** Atomic Coordinates and Equivalent Isotropic Displacement Parameters
- Table 3.** Selected Interatomic Distances
- Table 4.** Selected Interatomic Angles
- Table 5.** Torsional Angles
- Table 6.** Anisotropic Displacement Parameters
- Table 7.** Derived Atomic Coordinates and Displacement Parameters for Hydrogen Atoms

**Table 1.** Crystallographic Experimental Details**A. Crystal Data**

|                                             |                                      |
|---------------------------------------------|--------------------------------------|
| formula                                     | C <sub>21</sub> H <sub>14</sub> ClIO |
| formula weight                              | 444.67                               |
| crystal dimensions (mm)                     | 0.34 × 0.13 × 0.11                   |
| crystal system                              | triclinic                            |
| space group                                 | <i>P</i> $\bar{1}$ (No. 2)           |
| unit cell parameters <sup>a</sup>           |                                      |
| <i>a</i> (Å)                                | 8.1585 (3)                           |
| <i>b</i> (Å)                                | 10.0268 (4)                          |
| <i>c</i> (Å)                                | 11.7398 (5)                          |
| $\alpha$ (deg)                              | 82.2199 (4)                          |
| $\beta$ (deg)                               | 69.7716 (4)                          |
| $\gamma$ (deg)                              | 70.2331 (4)                          |
| <i>V</i> (Å <sup>3</sup> )                  | 847.84 (6)                           |
| <i>Z</i>                                    | 2                                    |
| $\rho_{\text{calcd}}$ (g cm <sup>-3</sup> ) | 1.742                                |
| $\mu$ (mm <sup>-1</sup> )                   | 2.050                                |

**B. Data Collection and Refinement Conditions**

|                                                       |                                                                             |
|-------------------------------------------------------|-----------------------------------------------------------------------------|
| diffractometer                                        | Bruker PLATFORM/APEX II CCD <sup>b</sup>                                    |
| radiation ( $\lambda$ [Å])                            | graphite-monochromated Mo K $\alpha$ (0.71073)                              |
| temperature (°C)                                      | -80                                                                         |
| scan type                                             | $\omega$ scans (0.3°) (15 s exposures)                                      |
| data collection $2\theta$ limit (deg)                 | 58.13                                                                       |
| total data collected                                  | 8279 ( $-10 \leq h \leq 11$ , $-13 \leq k \leq 13$ , $-15 \leq l \leq 15$ ) |
| independent reflections                               | 4253 ( $R_{\text{int}} = 0.0088$ )                                          |
| number of observed reflections ( <i>NO</i> )          | 4008 [ $F_o^2 \geq 2\sigma(F_o^2)$ ]                                        |
| structure solution method                             | Patterson/structure expansion ( <i>DIRDIF-2008</i> <sup>c</sup> )           |
| refinement method                                     | full-matrix least-squares on $F^2$ ( <i>SHELXL-2014</i> <sup>d</sup> )      |
| absorption correction method                          | Gaussian integration (face-indexed)                                         |
| range of transmission factors                         | 0.0365–0.0125                                                               |
| data/restraints/parameters                            | 4253 / 0 / 218                                                              |
| goodness-of-fit ( <i>S</i> ) <sup>e</sup> [all data]  | 1.053                                                                       |
| final <i>R</i> indices <sup>f</sup>                   |                                                                             |
| <i>R</i> <sub>1</sub> [ $F_o^2 \geq 2\sigma(F_o^2)$ ] | 0.0338                                                                      |
| <i>wR</i> <sub>2</sub> [all data]                     | 0.0944                                                                      |
| largest difference peak and hole                      | 3.038 and -0.273 e Å <sup>-3</sup>                                          |

<sup>a</sup>Obtained from least-squares refinement of 9922 reflections with  $4.32^\circ < 2\theta < 57.58^\circ$ .

(continued)



**Table 1.** Crystallographic Experimental Details (continued)

<sup>b</sup>Programs for diffractometer operation, data collection, data reduction and absorption correction were those supplied by Bruker.

<sup>c</sup>Beurskens, P. T.; Beurskens, G.; de Gelder, R.; Smits, J. M. M.; Garcia-Granda, S.; Gould, R. O. (2008). The *DIRDIF-2008* program system. Crystallography Laboratory, Radboud University Nijmegen, The Netherlands.

<sup>d</sup>Sheldrick, G. M. *Acta Crystallogr.* **2015**, *C71*, 3–8.

<sup>e</sup> $S = [\Sigma w(F_o^2 - F_c^2)^2 / (n - p)]^{1/2}$  ( $n$  = number of data;  $p$  = number of parameters varied;  $w = [\sigma^2(F_o^2) + (0.0555P)^2 + 0.8241P]^{-1}$  where  $P = [\text{Max}(F_o^2, 0) + 2F_c^2]/3$ ).

<sup>f</sup> $R_1 = \Sigma ||F_o| - |F_c|| / \Sigma |F_o|$ ;  $wR_2 = [\Sigma w(F_o^2 - F_c^2)^2 / \Sigma w(F_o^4)]^{1/2}$ .



**Table 2.** Atomic Coordinates and Equivalent Isotropic Displacement Parameters

| Atom | <i>x</i>    | <i>y</i>    | <i>z</i>    | <i>U</i> <sub>eq</sub> , Å <sup>2</sup> |
|------|-------------|-------------|-------------|-----------------------------------------|
| I    | -0.16274(3) | 1.01251(2)  | 0.38126(2)  | 0.04528(9)*                             |
| Cl   | 0.45284(12) | 0.31982(8)  | 0.82656(7)  | 0.04725(17)*                            |
| O    | 0.0996(3)   | 0.67582(19) | 0.40136(17) | 0.0340(4)*                              |
| C1   | 0.1987(3)   | 0.5312(3)   | 0.3946(2)   | 0.0326(5)*                              |
| C2   | 0.2207(3)   | 0.4777(3)   | 0.2874(2)   | 0.0325(5)*                              |
| C3   | 0.1325(3)   | 0.5952(3)   | 0.2200(2)   | 0.0328(5)*                              |
| C4   | 0.1058(4)   | 0.6091(3)   | 0.1072(2)   | 0.0350(5)*                              |
| C5   | 0.0076(4)   | 0.7423(3)   | 0.0707(2)   | 0.0361(5)*                              |
| C6   | -0.0619(4)  | 0.8572(3)   | 0.1483(2)   | 0.0360(5)*                              |
| C7   | -0.0389(4)  | 0.8439(3)   | 0.2617(2)   | 0.0339(5)*                              |
| C8   | 0.0604(3)   | 0.7121(3)   | 0.2949(2)   | 0.0321(5)*                              |
| C9   | 0.2623(3)   | 0.4759(3)   | 0.4994(2)   | 0.0317(5)*                              |
| C10  | 0.2462(4)   | 0.5707(3)   | 0.5825(3)   | 0.0372(5)*                              |
| C11  | 0.3065(4)   | 0.5239(3)   | 0.6818(3)   | 0.0394(5)*                              |
| C12  | 0.3806(4)   | 0.3798(3)   | 0.7000(2)   | 0.0359(5)*                              |
| C13  | 0.4003(4)   | 0.2823(3)   | 0.6191(3)   | 0.0398(6)*                              |
| C14  | 0.3412(4)   | 0.3309(3)   | 0.5189(3)   | 0.0385(5)*                              |
| C15  | 0.3167(3)   | 0.3325(3)   | 0.2393(2)   | 0.0325(5)*                              |
| C16  | 0.2530(4)   | 0.2188(3)   | 0.2925(3)   | 0.0367(5)*                              |
| C17  | 0.3407(4)   | 0.0852(3)   | 0.2418(3)   | 0.0390(5)*                              |
| C18  | 0.4917(4)   | 0.0628(3)   | 0.1376(3)   | 0.0371(5)*                              |
| C19  | 0.5566(4)   | 0.1767(3)   | 0.0828(2)   | 0.0387(5)*                              |
| C20  | 0.4691(4)   | 0.3100(3)   | 0.1339(2)   | 0.0361(5)*                              |
| C21  | -0.0254(5)  | 0.7632(4)   | -0.0501(3)  | 0.0458(6)*                              |

Anisotropically-refined atoms are marked with an asterisk (\*). The form of the anisotropic displacement parameter is:  $\exp[-2\pi^2(h^2a^{*2}U_{11} + k^2b^{*2}U_{22} + l^2c^{*2}U_{33} + 2klb^*c^*U_{23} + 2hla^*c^*U_{13} + 2hka^*b^*U_{12})]$ .

**Table 3.** Selected Interatomic Distances (Å)

| Atom1 | Atom2 | Distance | Atom1 | Atom2 | Distance |
|-------|-------|----------|-------|-------|----------|
| I     | C7    | 2.087(3) | C7    | C8    | 1.382(3) |
| Cl    | C12   | 1.744(3) | C9    | C10   | 1.397(4) |
| O     | C1    | 1.399(3) | C9    | C14   | 1.399(4) |
| O     | C8    | 1.368(3) | C10   | C11   | 1.384(4) |
| C1    | C2    | 1.366(4) | C11   | C12   | 1.383(4) |
| C1    | C9    | 1.467(3) | C12   | C13   | 1.388(4) |
| C2    | C3    | 1.450(3) | C13   | C14   | 1.390(4) |
| C2    | C15   | 1.482(3) | C15   | C16   | 1.394(4) |
| C3    | C4    | 1.396(4) | C15   | C20   | 1.396(4) |
| C3    | C8    | 1.396(4) | C16   | C17   | 1.391(4) |
| C4    | C5    | 1.402(4) | C17   | C18   | 1.382(4) |
| C5    | C6    | 1.402(4) | C18   | C19   | 1.405(4) |
| C5    | C21   | 1.508(4) | C19   | C20   | 1.390(4) |
| C6    | C7    | 1.389(4) |       |       |          |

**Table 4.** Selected Interatomic Angles (deg)

| Atom1 | Atom2 | Atom3 | Angle      | Atom1 | Atom2 | Atom3 | Angle    |
|-------|-------|-------|------------|-------|-------|-------|----------|
| C1    | O     | C8    | 106.08(19) | C3    | C8    | C7    | 122.1(2) |
| O     | C1    | C2    | 111.0(2)   | C1    | C9    | C10   | 119.2(2) |
| O     | C1    | C9    | 113.4(2)   | C1    | C9    | C14   | 122.5(2) |
| C2    | C1    | C9    | 135.5(2)   | C10   | C9    | C14   | 118.3(2) |
| C1    | C2    | C3    | 106.3(2)   | C9    | C10   | C11   | 121.4(3) |
| C1    | C2    | C15   | 130.5(2)   | C10   | C11   | C12   | 119.0(3) |
| C3    | C2    | C15   | 123.1(2)   | Cl    | C12   | C11   | 119.2(2) |
| C2    | C3    | C4    | 134.2(2)   | Cl    | C12   | C13   | 119.4(2) |
| C2    | C3    | C8    | 105.6(2)   | C11   | C12   | C13   | 121.4(2) |
| C4    | C3    | C8    | 120.1(2)   | C12   | C13   | C14   | 119.0(3) |
| C3    | C4    | C5    | 118.8(2)   | C9    | C14   | C13   | 120.9(3) |
| C4    | C5    | C6    | 119.3(2)   | C2    | C15   | C16   | 121.7(2) |
| C4    | C5    | C21   | 121.0(3)   | C2    | C15   | C20   | 119.3(2) |
| C6    | C5    | C21   | 119.7(2)   | C16   | C15   | C20   | 118.8(2) |
| C5    | C6    | C7    | 122.3(2)   | C15   | C16   | C17   | 120.4(3) |
| I     | C7    | C6    | 121.41(19) | C16   | C17   | C18   | 120.7(3) |
| I     | C7    | C8    | 121.20(19) | C17   | C18   | C19   | 119.3(2) |
| C6    | C7    | C8    | 117.3(2)   | C18   | C19   | C20   | 119.8(3) |
| O     | C8    | C3    | 110.9(2)   | C15   | C20   | C19   | 120.8(3) |
| O     | C8    | C7    | 126.9(2)   |       |       |       |          |

**Table 5.** Torsional Angles (deg)

| Atom1 | Atom2 | Atom3 | Atom4 | Angle     | Atom1 | Atom2 | Atom3 | Atom4 | Angle      |
|-------|-------|-------|-------|-----------|-------|-------|-------|-------|------------|
| C8    | O     | C1    | C2    | -0.3(3)   | C3    | C4    | C5    | C21   | -179.9(3)  |
| C8    | O     | C1    | C9    | 176.5(2)  | C4    | C5    | C6    | C7    | -0.7(4)    |
| C1    | O     | C8    | C3    | -0.3(3)   | C21   | C5    | C6    | C7    | 178.8(3)   |
| C1    | O     | C8    | C7    | 178.6(3)  | C5    | C6    | C7    | I     | -174.8(2)  |
| O     | C1    | C2    | C3    | 0.8(3)    | C5    | C6    | C7    | C8    | 1.6(4)     |
| O     | C1    | C2    | C15   | 179.2(2)  | I     | C7    | C8    | O     | -3.7(4)    |
| C9    | C1    | C2    | C3    | -175.0(3) | I     | C7    | C8    | C3    | 175.02(19) |
| C9    | C1    | C2    | C15   | 3.4(5)    | C6    | C7    | C8    | O     | 179.9(2)   |
| O     | C1    | C9    | C10   | -10.0(3)  | C6    | C7    | C8    | C3    | -1.4(4)    |
| O     | C1    | C9    | C14   | 170.9(2)  | C1    | C9    | C10   | C11   | -179.1(3)  |
| C2    | C1    | C9    | C10   | 165.7(3)  | C14   | C9    | C10   | C11   | 0.1(4)     |
| C2    | C1    | C9    | C14   | -13.4(5)  | C1    | C9    | C14   | C13   | 179.8(3)   |
| C1    | C2    | C3    | C4    | -179.0(3) | C10   | C9    | C14   | C13   | 0.7(4)     |
| C1    | C2    | C3    | C8    | -0.9(3)   | C9    | C10   | C11   | C12   | -1.4(4)    |
| C15   | C2    | C3    | C4    | 2.4(4)    | C10   | C11   | C12   | Cl    | -178.8(2)  |
| C15   | C2    | C3    | C8    | -179.5(2) | C10   | C11   | C12   | C13   | 1.9(4)     |
| C1    | C2    | C15   | C16   | 67.0(4)   | Cl    | C12   | C13   | C14   | 179.5(2)   |
| C1    | C2    | C15   | C20   | -116.6(3) | C11   | C12   | C13   | C14   | -1.2(4)    |
| C3    | C2    | C15   | C16   | -114.8(3) | C12   | C13   | C14   | C9    | -0.2(4)    |
| C3    | C2    | C15   | C20   | 61.5(3)   | C2    | C15   | C16   | C17   | 176.8(2)   |
| C2    | C3    | C4    | C5    | 178.5(3)  | C20   | C15   | C16   | C17   | 0.4(4)     |
| C8    | C3    | C4    | C5    | 0.7(4)    | C2    | C15   | C20   | C19   | -176.6(2)  |
| C2    | C3    | C8    | O     | 0.8(3)    | C16   | C15   | C20   | C19   | -0.2(4)    |
| C2    | C3    | C8    | C7    | -178.2(2) | C15   | C16   | C17   | C18   | -0.3(4)    |
| C4    | C3    | C8    | O     | 179.2(2)  | C16   | C17   | C18   | C19   | 0.0(4)     |
| C4    | C3    | C8    | C7    | 0.2(4)    | C17   | C18   | C19   | C20   | 0.2(4)     |
| C3    | C4    | C5    | C6    | -0.4(4)   | C18   | C19   | C20   | C15   | -0.1(4)    |

**Table 6.** Anisotropic Displacement Parameters ( $U_{ij}$ , Å<sup>2</sup>)

| Atom | $U_{11}$    | $U_{22}$    | $U_{33}$    | $U_{23}$    | $U_{13}$    | $U_{12}$    |
|------|-------------|-------------|-------------|-------------|-------------|-------------|
| I    | 0.05562(14) | 0.03080(12) | 0.04463(13) | -0.00449(8) | -0.01609(9) | -0.00624(9) |
| Cl   | 0.0623(4)   | 0.0477(4)   | 0.0436(4)   | 0.0100(3)   | -0.0305(3)  | -0.0224(3)  |
| O    | 0.0386(9)   | 0.0267(8)   | 0.0332(8)   | -0.0012(7)  | -0.0133(7)  | -0.0038(7)  |
| C1   | 0.0321(11)  | 0.0263(11)  | 0.0353(12)  | 0.0001(9)   | -0.0103(9)  | -0.0048(9)  |
| C2   | 0.0333(11)  | 0.0286(11)  | 0.0340(11)  | 0.0011(9)   | -0.0118(9)  | -0.0075(9)  |
| C3   | 0.0321(11)  | 0.0301(12)  | 0.0332(11)  | 0.0006(9)   | -0.0099(9)  | -0.0072(9)  |
| C4   | 0.0356(12)  | 0.0335(12)  | 0.0341(12)  | -0.0019(10) | -0.0105(10) | -0.0089(10) |
| C5   | 0.0362(12)  | 0.0378(13)  | 0.0340(12)  | 0.0035(10)  | -0.0120(10) | -0.0119(10) |
| C6   | 0.0373(12)  | 0.0314(12)  | 0.0387(13)  | 0.0060(10)  | -0.0164(10) | -0.0084(10) |
| C7   | 0.0355(12)  | 0.0283(11)  | 0.0349(12)  | 0.0001(9)   | -0.0111(10) | -0.0068(9)  |
| C8   | 0.0331(11)  | 0.0316(12)  | 0.0306(11)  | 0.0012(9)   | -0.0116(9)  | -0.0084(9)  |
| C9   | 0.0323(11)  | 0.0310(12)  | 0.0314(11)  | 0.0022(9)   | -0.0111(9)  | -0.0098(9)  |
| C10  | 0.0394(13)  | 0.0316(12)  | 0.0391(13)  | -0.0016(10) | -0.0148(11) | -0.0064(10) |
| C11  | 0.0428(14)  | 0.0386(14)  | 0.0364(13)  | -0.0035(10) | -0.0151(11) | -0.0090(11) |
| C12  | 0.0375(12)  | 0.0389(13)  | 0.0342(12)  | 0.0051(10)  | -0.0149(10) | -0.0146(10) |
| C13  | 0.0478(14)  | 0.0323(13)  | 0.0425(14)  | 0.0053(11)  | -0.0214(12) | -0.0118(11) |
| C14  | 0.0470(14)  | 0.0310(12)  | 0.0387(13)  | 0.0014(10)  | -0.0184(11) | -0.0098(11) |
| C15  | 0.0333(11)  | 0.0297(12)  | 0.0332(11)  | -0.0021(9)  | -0.0130(9)  | -0.0053(9)  |
| C16  | 0.0367(12)  | 0.0330(13)  | 0.0374(12)  | -0.0011(10) | -0.0102(10) | -0.0091(10) |
| C17  | 0.0446(14)  | 0.0298(12)  | 0.0452(14)  | 0.0004(10)  | -0.0188(12) | -0.0109(11) |
| C18  | 0.0425(13)  | 0.0293(12)  | 0.0400(13)  | -0.0072(10) | -0.0184(11) | -0.0039(10) |
| C19  | 0.0374(13)  | 0.0384(14)  | 0.0338(12)  | -0.0034(10) | -0.0089(10) | -0.0052(11) |
| C20  | 0.0372(12)  | 0.0334(13)  | 0.0347(12)  | 0.0005(10)  | -0.0108(10) | -0.0088(10) |
| C21  | 0.0537(17)  | 0.0459(16)  | 0.0381(14)  | 0.0006(12)  | -0.0210(12) | -0.0101(13) |

The form of the anisotropic displacement parameter is:

$$\exp[-2\pi^2(h^2a^*{}^2U_{11} + k^2b^*{}^2U_{22} + l^2c^*{}^2U_{33} + 2klb^*c^*U_{23} + 2hla^*c^*U_{13} + 2hka^*b^*U_{12})]$$

**Table 7.** Derived Atomic Coordinates and Displacement Parameters for Hydrogen Atoms

| Atom | <i>x</i> | <i>y</i> | <i>z</i> | $U_{\text{eq}}, \text{\AA}^2$ |
|------|----------|----------|----------|-------------------------------|
| H4   | 0.1533   | 0.5298   | 0.0561   | 0.042                         |
| H6   | -0.1270  | 0.9473   | 0.1226   | 0.043                         |
| H10  | 0.1927   | 0.6695   | 0.5705   | 0.045                         |
| H11  | 0.2972   | 0.5897   | 0.7366   | 0.047                         |
| H13  | 0.4535   | 0.1837   | 0.6319   | 0.048                         |
| H14  | 0.3544   | 0.2649   | 0.4629   | 0.046                         |
| H16  | 0.1489   | 0.2327   | 0.3640   | 0.044                         |
| H17  | 0.2963   | 0.0085   | 0.2791   | 0.047                         |
| H18  | 0.5510   | -0.0287  | 0.1033   | 0.045                         |
| H19  | 0.6600   | 0.1627   | 0.0109   | 0.046                         |
| H20  | 0.5136   | 0.3867   | 0.0967   | 0.043                         |
| H21A | -0.1452  | 0.8346   | -0.0427  | 0.055                         |
| H21B | -0.0241  | 0.6734   | -0.0750  | 0.055                         |
| H21C | 0.0716   | 0.7953   | -0.1111  | 0.055                         |
